# Supplementary material for: Global research trends at the intersection of coronavirus disease 2019 (COVID-19) and traditional, integrative, and complementary and alternative medicine: a bibliometric analysis
Source: BMC Complement Med Ther. 2020 Nov 23;20:353. doi: 10.1186/s12906-020-03151-8 (PMC7680977; doi:10.1186/s12906-020-03151-8)
Supplement: Supplementary file 1 — Additional file 1. Supplementary file 1. Characteristics of All Eligible Articles Published at the Intersection of COVID-19 and TICAM. [file 12906_2020_3151_MOESM1_ESM.xlsx]

## Sheet: Sheet1
Article Title	Author Names	Affiliations	Author Affiliated Countries [Listed in the Order of Affiliations if More Than One Country]	Digital Object Identifer	Language of Publication	Publication Type [As Indexed by the Academic Databases]	Year of Publication	Journal	TICAM-Focussed Journal	2018 Journal Impact Factor [As Per Journal Citation Reports]	TICAMs Mentioned
A critical review: Traditional uses, phytochemistry, pharmacology and toxicology of Stephania tetrandra S. Moore (Fen Fang Ji)	Jiang Y, Liu M, Liu H, Liu S	Department of Pharmacy, Xiangya Hospital, Central South University, Changsha, 410008, China Institute of Hospital Pharmacy, Central South University, Changsha, 410008, China Institute for Rational and Safe Medication Practices, National Clinical Research Center for Geriatric Disorders, Xiangya Hospital, Central South University, Changsha, 410008, China	China	https://doi.org/10.1007/s11101-020-09673-w	English	Review	2020	Phytochemistry Reviews	Yes	4.257	TCM
A molecular modeling approach to identify effective antiviral phytochemicals against the main protease of SARS-CoV-2	Islam R, Parves MR, Paul AS, Uddin N, Rahman MS, Mamun AA, Hossain MN, Ali MA, Halim MA	Division of Computer Aided Drug Design, The Red-Green Research Centre, BICCB, Dhaka, Bangladesh Department of Chemistry and Biochemistry, South Dakota State University, Brookings, SD, United States Key Laboratory of Soft Chemistry and Functional Materials of MOE, School of Chemical Engineering, Nanjing University of Science and Technology, Nanjing, China Department of Physical Sciences, Universit…	Bangladesh, United States, China	https://doi.org/10.1080/07391102.2020.1761883	English	Article	2020	Journal of Biomolecular Structure & Dynamics	No	3.31	Phytochemicals
A new clinical trial to test high-dose vitamin C in patients with COVID-19	Carr AC	Department of Pathology and Biomedical Science, University of Otago, Christchurch, PO Box 4345, Christchurch, 8140, New Zealand	New Zealand	https://doi.org/10.1186/s13054-020-02851-4	English	Letter	2020	Critical Care	No	6.959	Vitamin C
A novel combination of vitamin C, curcumin and glycyrrhizic acid potentially regulates immune and inflammatory response associated with coronavirus infections: A perspective from system biology analysis	Chen L, Hu C, Hood M, Zhang X, Zhang L, Kan J, Du J	Nutrilite Health Institute, 720 Cailun Road, Shanghai, 201203, China Nutrilite Health Institute, 5600 Beach Boulevard, Buena Park, CA 90621, United States Nutrilite Health Institute, 7575 East Fulton Avenue, Ada, MI 49355, United States	China, United States	https://doi.org/10.3390/nu12041193	English	Article	2020	Nutrients	No	4.171	Vitamin C, Curcumin, Glycyrrhizic Acid
A possible probiotic (S. salivarius K12) approach to improve oral and lung microbiotas and raise defenses against SARS-CoV-2	Di Pierro F	Velleja Research, Milan, Italy	Italy	https://doi.org/10.23736/S0026-4806.20.06570-2	English	Article	2020	Minerva Medica	No	2.475	Probiotics
A randomized multicenter clinical trial to evaluate the efficacy of melatonin in the prophylaxis of SARS-CoV-2 infection in high-risk contacts (MeCOVID Trial): A structured summary of a study protocol for a randomised controlled trial	Garcia IG, Rodriguez-Rubio M, Mariblanca AR, de Soto LM, Garcia LD, Villatoro JM, Parada JQ, Meseguer ES, Rosales MJ, Gonzalez J, Arribas JR, Carcas AJ, de la Oliva P, Borobia AM	Clinical Pharmacology Department, Clinical Trial Unit, La Paz University Hospital - IdiPAZ, Paseo de la Castellana, 261, 28046, Madrid, Spain. School of Medicine, Universidad Autonoma de Madrid, Madrid, Spain. Pediatric Intensive Care Department, La Paz University Hospital - IdiPAZ, Paseo de la Castellana, 261, 28046, Madrid, Spain. Clinical Trial Unit, La Paz University Hospital - IdiPAZ, Madrid…	Spain	https://doi.org/10.1186/s13063-020-04436-6	English	Letter	2020	Trials	No	1.975	Melatonin
A review of therapeutic agents and Chinese herbal medicines against SARS-COV-2 (COVID-19)	Huang F, Li Y, Leung EL-H, Liu X, Liu K, Wang Q, Lan Y, Li X, Yu H, Cui L, Luo H, Luo L	Graduate School of Guangdong Medical University, Zhanjiang, 524023, China University of Texas Health Science Center at San Antonio, San Antonio, TX 78229, United States State Key Laboratory of Quality Research in Chinese Medicine, Macau University of Science and Technology Macau, SAR, China The First Clinical College of Guangdong Medical University, Zhanjiang, 524023, China Animal Experiment Cent…	United States, China	https://doi.org/10.1016/j.phrs.2020.104929	English	Review	2020	Pharmacological Research	No	5.574	TCM
A review on clinical application of high frequency traditional Chinese medicine in treatment of coronavirus pneumonia 2019 [临床使用治疗新型冠状病毒肺炎中药复方中高频数中药抗病毒研究概述]	Shao Z-B, Zhu Y-X, Liu S-H, Jiang K-J, Wu Q, Shen J-Y, Liu W-W	Jiangsu Ocean University, Lianyungang, 222000, China Lianyungang Food and Drug Inspection and Testing Center, Lianyungang, 222000, China	China	https://doi.org/10.7501/j.issn.0253-2670.2020.05.009	Chinese	Article	2020	Chinese Traditional and Herbal Drugs	Yes	N/A	TCM
A united statement of the global chiropractic research community against the pseudoscientific claim that chiropractic care boosts immunity	Côté P, Bussières A, Cassidy JD, Hartvigsen J, Kawchuk GN, Leboeuf-Yde C, Mior S, Schneider M, Aillet L, Ammendolia C, Arnbak B, Axen I, Baechler M, Barbier-Cazorla F, Barbier G, Bergstrøm C, Beynon A, Blanchette M-A, Bolton PS, Breen A, Brinch J, Bronfort G, Brown B, Bruno P, Konner MB, Burrell C, Busse JW, Byfield D, Campello M, Cancelliere C, Carroll L, Cedraschi C, Chéron C, Chow N, Christens…	Faculty of Health Sciences, Ontario Tech University, Oshawa, Canada Centre for Disability Prevention and Rehabilitation at Ontario Tech University and CMCC, Oshawa, Canada Division of Epidemiology, Dalla Lana School of Public Health, University of Toronto, Toronto, Canada Département Chiropratique, Université du Québec À Trois-Rivières, Trois-Rivières, Canada School of Physical and Occupational T…	Canada, Denmark, United States	https://doi.org/10.1186/s12998-020-00312-x	English	Review	2020	Chiropractic and Manual Therapies	Yes	N/A	Chiropractic
Active constituents and mechanisms of Respiratory Detox Shot, a traditional Chinese medicine prescription, for COVID-19 control and prevention: Network-molecular docking-LC–MSE analysis	Zhang Z-J, Wu W-Y, Hou J-J, Zhang L-L, Li F-F, Gao L, Wu X-D, Shi J-Y, Zhang R, Long H-L, Lei M, Wu W-Y, Guo D-A, Chen K-X, Hofmann LA, Ci Z-H	Shanghai Institute of Materia Medica, Chinese Academy of Sciences, Shanghai, 201203, China University of Chinese Academy of Sciences, Beijing, 100049, China World Health Science Organization, Leesburg, VA 20176, United States	China, United States	https://doi.org/10.1016/j.joim.2020.03.004	English	Article	2020	Journal of Integrative Medicine	Yes	N/A	TCM
Acute inflammation and pathogenesis of SARS-CoV-2 infection: Cannabidiol as a potential anti-inflammatory treatment?	Costiniuk CT, Jenabian M-A	Infectious Diseases and Immunity in Global Health, Research Institute of McGill University Health Centre, Montreal, QC, Canada Division of Infectious Diseases/Chronic Viral Illness Service, McGill University Health Centre, Montreal, QC, Canada Department of Microbiology & Immunology, McGill University, Montreal, QC, Canada Department of Microbiology & Immunology, McGill University, Montreal, QC, …	Canada	https://doi.org/10.1016/j.cytogfr.2020.05.008	English	Letter	2020	Cytokine & Growth Factor Reviews	No	5.458	Cannabis
Analysis of medication characteristics of traditional Chinese medicine in treating coronavirus disease-19 based on data mining	Fan T, Chen Y, Bai Y, Ma F, Wang H, Yang Y, Chen J, Lin Y	College of Basic Medical Sciences, Zhejiang Chinese Medical University, Hangzhou, 310053, China Gastroenterology of Chinese Medicine, Tongde Hospital of Zhejiang Province, Hangzhou, 310007, China	China		Chinese	Article	2020	Zhejiang Da Xue Xue Bao. (Journal of Zhejiang University Medical Sciences)	Yes	N/A	TCM
Analysis of property and efficacy of traditional Chinese medicine in staging revention and treatment of coronavirus disease 2019	Gu M, Liu J, Shi N-N, Li X-D, Huang Z, Wu J-K, Wang Y-G, Wang Y-P, Zhai H-Q, Wang Y-Y	School of Chinese Materia Medica, Beijing University of Chinese Medicine Beijing 102488, China Institute of Basic Research in Clinical Medicine, China Academy of Chinese Medical Sciences Beijing 100700, China Hubei Provincial Hospital of Traditional Chinese Medicine Wuhan 434100, China Beijing Hospital of Traditional Chinese Medicine, Capital Medical University Beijing 100010, China	China	https://doi.org/10.19540/j.cnki.cjcmm.20200225.501	Chinese	Article	2020	Zhongguo Zhongyao Zazhi (China Journal of Chinese Materia Medica)	Yes	N/A	TCM
Analysis of TCM in prevention and treatment of post-traumatic stress disorder induced by COVID-19 [中医药防治新型冠状病毒肺炎所致创伤后应激障碍用药探析]	Li Y-F, Zhang Y-G, Niu J-T, Si X-L, Yan X-K	Gansu University of Chinese Medicine, Lanzhou, 730000, China Gansu Key Laboratory of Molecular Medicine and Traditional Chinese Medicine for Prevention and Treatment of Major Diseases, Lanzhou, 730000, China	China	https://doi.org/10.7501/j.issn.0253-2670.2020.05.006	Chinese	Article	2020	Chinese Traditional and Herbal Drugs	Yes	N/A	TCM
Analysis on clinical study protocols of traditional Chinese medicine for coronavirus disease 2019	Wang H, Jin X-Y, Pang B, Liu C-X, Zheng W-K, Yang F-W, Pang W-T, Zhang J-H	Evidence-based Medicine Center, Tianjin University of Traditional Chinese Medicine Tianjin 301617, China	China	https://doi.org/10.19540/j.cnki.cjcmm.20200220.501	Chinese	Article	2020	Zhongguo Zhongyao Zazhi (China Journal of Chinese Materia Medica)	Yes	N/A	TCM
Analysis on diagnosis and treatment scheme of traditional Chinese medicine in treatment of COVID-19 in Chinese provinces and regions [全国各省区中医药治疗新型冠状病毒肺炎（COVID-19）的诊疗方案分析]	Ren W-Y, Su J, Liu Y-Q, Hou W-Q, Zheng Y-J, Wei B-J, Jin X-J, Zhang L-Y, Zhang Z-M, Liu D-L, Ning Y-M	Gansu Key Laboratory for Molecular Medicine of Major Diseases and Prevention and Treatment with Traditional Chinese Medicine Research, Gansu University of Chinese Medicine, Lanzhou, 730000, China Gansu Clinical Center for Integrated Prevention and Treatment of Traditional Chinese and Western Medicine, Affiliated Hospital of Gansu University of Chinese Medicine, Lanzhou, 730000, China Dunhuang Key…	China	https://doi.org/10.7501/j.issn.0253-2670.2020.05.007	Chinese	Article	2020	Chinese Traditional and Herbal Drugs	Yes	N/A	TCM
Analysis on pattern of prescriptions and syndromes of traditional Chinese medicine for prevention and treatment of COVID-19	Pang W-T, Jin X-Y, Pang B, Yang F-W, Wang H, Liu C-X, Zheng W-K, Zhang J-H	Evidence-based Medicine Centre, Tianjin University of Traditional Chinese Medicine Tianjin 301617, China	China	https://doi.org/10.19540/j.cnki.cjcmm.20200218.502	Chinese	Article	2020	Zhongguo Zhongyao Zazhi (China Journal of Chinese Materia Medica)	Yes	N/A	TCM
Analysis on prevention plan of coronavirus disease 2019 (COVID-19) by traditional Chinese medicine in various regions [各地区中医药预防新型冠状病毒肺炎（COVID-19）方案分析]	Xu X, Zhang Y, Li X, Li X-X	Tianjin Key Laboratory of Traditional Chinese Medicine Quality Markers Research, Tianjin Institute of Pharmaceutical Research, Tianjin, 300301, China The First Affiliated Hospital of Tianjin University of Traditional Chinese Medicine, Tianjin, 300193, China North China University of Technology, Tangshan, 063210, China	China	https://doi.org/10.7501/j.issn.0253-2670.2020.04.006	Chinese	Article	2020	Chinese Traditional and Herbal Drugs	Yes	N/A	TCM
Antiviral Effects of probiotic metabolites on COVID-19	Anwar F, Altayb HN, Al-Abbasi FA, Al-Malki AL, Kamal MA, Kumar V	Department of Biochemistry, Faculty of Sciences, King Abdulaziz University, Jeddah, Saudi Arabia. King Fahd Medical Research Centre, King Abdulaziz University, Jeddah, Saudi Arabia. Enzymoics, 7 Peterlee Place, Hebersham, NSW 2770. Novel Global Community Educational Foundation, Australia. Natural Product Discovery Laboratory, Department of Pharmaceutical Sciences, Shalom Institute of Health and A…	Saudi Arabia, Australia, India	https://doi.org/10.1080/07391102.2020.1775123	English	Article	2020	Journal of Biomolecular Structure & Dynamics	No	3.31	Probiotics
Application of integrative medicine protocols in treatment of coronavirus disease 2019 [中西医结合治疗新型冠状病毒肺炎的应用分析]	Han Y-Y, Zhao M-R, Shi Y, Song Z-H, Zhou S-P, He Y	TCM Research Center, Tasly Holding Group Co., Ltd., Tianjin, 300410, China State Key Laboratory of Critical Technology in Innovative Chinese Medicine, Tasly Pharmaceutical Group Co., Ltd., Tianjin, 300410, China Tianjin University of Traditional Chinese Medicine, Tianjin, 301617, China	China	https://doi.org/10.7501/j.issn.0253-2670.2020.04.008	Chinese	Article	2020	Chinese Traditional and Herbal Drugs	Yes	N/A	Integrative Medicine
Application of traditional Chinese medicine in prevention and treatment of COVID-19 [基于中医药防治新型冠状病毒肺炎的用药探析]	Liu J, Cui Y, Bai M-X, Zhang H-W, Jin Y-L, Lv P	Zhengzhou Hospital of Traditional Chinese Medicine, Zhengzhou, 450007, China Henan College of Chinese Medicine, Zhengzhou, 450008, China NMPA Key Laboratory for Quality Control of Chinese Medicinal Materials and Prepared Slices, Henan Institute for Food and Drug Control, Zhengzhou, 450018, China	China	https://doi.org/10.7501/j.issn.0253-2670.2020.04.005	Chinese	Article	2020	Chinese Traditional and Herbal Drugs	Yes	N/A	TCM
Are probiotics effective adjuvant therapeutic choice in patients with COVID-19?	Di Renzo L, Merra G, Esposito E, De Lorenzo A	Section of Clinical Nutrition and Nutrigenomic, Department of Biomedicine and Prevention, University of Tor Vergata, Rome, Italy	Italy	https://doi.org/10.26355/eurrev_202004_20977	English	Letter	2020	European Review for Medical and Pharmacological Sciences	No	2.721	Probiotics
Authors of article ‘Optimisation of vitamin D status for enhanced immunoprotection against COVID-19’ by Mccartney et al (Ir med j; vol 113; no. 4; p58) Comment on response report ‘COVID-19, cocooning and vitamin D requirements’ by Mckenna et al (ir med j; vol 113; no. 5; p89)	McCartney DM, Byrne DG	School of Biological and Health Sciences, College of Sciences & Health, Technological University Dublin City Campus, Kevin Street, Dublin, D08 NF82, Ireland Department of Internal Medicine, St. James’s Hospital, James’s Street, Dublin 8, Ireland Dept. of Clinical Medicine, School of Medicine, Trinity College Dublin, Dublin 2, Ireland	Ireland		English	Editorial	2020	Irish Medical Journal	No	N/A	Vitamin D
Ayurveda and COVID-19: Where psychoneuroimmunology and the meaning response meet	Rajkumar RP	Department of Psychiatry, Jawaharlal Institute of Postgraduate Medical Education and Research (JIPMER), Dhanvantari Nagar PostPondicherry 605 006, India	India	https://doi.org/10.1016/j.bbi.2020.04.056	English	Review	2020	Brain, Behavior, and Immunity	No	6.17	Ayurveda
Ayurveda’s holistic lifestyle approach for the management of coronavirus disease (COVID-19): Possible role of Tulsi	Goothy SSK, Goothy S, Choudhary A, Potey GG, Chakraborty H, Kumar AHS, Mahadik VK	Department of Physiology, R D Gardi Medical College, Ujjain, Madhya Pradesh, India Department of Biochemistry, R D Gardi Medical College, Ujjain, Madhya Pradesh, India Department of Stemcology, University College, Dublin, Belfield, Dublin-4, Ireland R D Gardi Medical College, Ujjain, Madhya Pradesh, India	India, Ireland	https://doi.org/10.26452/ijrps.v11iSPL1.1976	English	Article	2020	International Journal of Research in Pharmaceutical Sciences	No	N/A	Ayurveda
Becoming a faithful defender: Traditional Chinese Medicine against Coronavirus Disease 2019 (COVID-19)	Zhang L, Yu J, Zhou Y, Shen M, Sun L	Clinical Medical College of Zhejiang Chinese Medical University, Hangzhou, Zhejiang, 310053, China College of Basic Medical Science, Zhejiang Chinese Medical University, Hangzhou, ZHEJIANG, 310053, China Department of Medical Oncology, Hospital of Zhejiang Chinese Medical University, No. 54, Youdian Road, Shangcheng District, Hangzhou, Zhejiang, 310006, China	China	https://doi.org/10.1142/S0192415X2050038X	English	Article	2020	American Journal of Chinese Medicine	No	3.51	TCM
Can complementary and alternative medicines be beneficial in the treatment of COVID-19 through improving immune system function?	Nilashi M, Samad S, Yusuf SYM, Akbari E	Informetrics Research Group, Ton Duc Thang University, Ho Chi Minh City, Vietnam Faculty of Information Technology, Ton Duc Thang University, Ho Chi Minh City, Vietnam Department of Business Administration, College of Business and Administration, Princess Nourah bint Abdulrahman University, Riyadh, Saudi Arabia Primary Care Medicine Discipline, Faculty of Medicine, Sungai Buloh, Universiti Teknol…	Vietnam, Saudi Arabia, Malaysia	https://doi.org/10.1016/j.jiph.2020.05.009	English	Letter	2020	Journal of Infection and Public Health	No	2.487	CAM General
Can early and high intravenous dose of vitamin C prevent and treat coronavirus disease 2019 (COVID-19)?	Cheng RZ	Cheng Integrative Health Center, Columbia, SC 29212, United States	United States	https://doi.org/10.1016/j.medidd.2020.100028	English	Editorial	2020	Medicine in Drug Discovery	No	N/A	Vitamin C
Can melatonin reduce the severity of COVID-19 pandemic?	Shneider A, Kudriavtsev A, Vakhrusheva A	CureLab Oncology, Inc, Dedham, MA, United States Department of Molecular Biology, Ariel University, Ariel, Israel Biological Faculty, Lomonosov Moscow State University, Moscow, Russian Federation Emanuel Institute of Biochemical Phisics, RAS, Moscow, Russian Federation	United States, Israel, Russia	https://doi.org/10.1080/08830185.2020.1756284	English	Note	2020	International Reviews of Immunology	No	3.481	Melatonin
Cannabidiol as prophylaxis for SARS-CoV-2 and COVID-19? Unfounded claims versus potential risks of medications during the pandemic	Brown JD	Center for Drug Evaluation & Safety, Department of Pharmaceutical Outcomes & Policy, University of Florida College of Pharmacy, United States	United States	https://doi.org/10.1016/j.sapharm.2020.03.020	English	Letter	2020	Research in Social and Administrative Pharmacy	No	2.719	Cannabis
Cannabinoid receptor type 2: A possible target in SARS-CoV-2 (CoV-19) infection?	Rossi F, Tortora C, Argenziano M, Di Paola A, Punzo F	Department of Woman, Child and General and Specialist Surgery, University of Campania "Luigi Vanvitelli", L. De Crecchio 4, Naples 80138, Italy Department of Experimental Medicine, University of Campania "Luigi Vanvitelli", S. Maria di Costantinopoli 16, Naples 80138, Italy	Italy	https://doi.org/10.3390/ijms21113809	English	Review	2020	International Journal of Molecular Sciences	No	4.183	Cannabis?
Cannabis in the Time of Coronavirus Disease 2019: The Yin and Yang of the Endocannabinoid System in Immunocompetence	Sexton M	Department of Anesthesiology, University of California, San Diego, San Diego, CA, USA	United States	https://doi.org/10.1089/acm.2020.0144	English	Article	2020	Journal of Alternative and Complementary Medicine	Yes	1.868	Cannabis
China is promoting coronavirus treatments based on unproven traditional medicines	Cyranoski D			https://doi.org/10.1038/d41586-020-01284-x	English	News	2020	Nature	No	43.07	TCM
Chinese herbal Huo-Gu Formula for treatment of steroid-associated osteonecrosis of femoral head: a 14-years follow-up of convalescent SARS patients	Huang Z, Fu F, Ye H, Gao H, Tan B, Wang R, Lin N, Qin L, Chen W	Wangjing Hospital, China Academy of Chinese Medical Sciences, PR China. Guizhou University of Traditional Chinese Medicine, PR China. The Third Affiliated Hospital of Beijing University of Chinese Medicine, PR China. Institute of Chinese Materia Medica, China Academy of Chinese Medical Sciences, PR China. Musculoskeletal Research Laboratory, Department of Orthopaedics & Traumatology, Innovative O…	China	https://doi.org/10.1016/j.jot.2020.03.014	English	Article	2020	Journal of Orthopaedic Translation	No	3.063	TCM
Chinese herbal medicine for SARS and SARS-CoV-2 treatment and prevention, encouraging using herbal medicine for COVID-19 outbreak	Shahrajabian MH, Sun W, Shen H, Cheng Q	Biotechnology Research Institute, Chinese Academy of Agricultural Sciences, Beijing, China NMPA Key Laboratory for Testing and Risk Warning of Pharmaceutical Microbiology, Biological Inspection Department, Zhejiang Institute for Food and Drug Control, Hangzhou, China College of Life Sciences, Hebei Agricultural University, Baoding, Hebei, 071000, China Global Alliance of HeBAU-CLS&HeQiS for BioAl…	China	https://doi.org/10.1080/09064710.2020.1763448	English	Article	2020	Acta Agriculturae Scandinavica Section B: Soil and Plant Science	No	0.81	TCM
Chiropractic students call for action against unsubstantiated claims	Plener J, Csiernik B, Bejarano G, Hjertstrand J, Goodall B	Canadian Memorial Chiropractic College, 6100 Leslie St., Toronto, ON M2H 3J1, Canada Palmer College of Chiropractic, Florida Campus, 4777 City Center Pkwy, Port Orange, FL 32129, United States University of South Wales, Treforest Campus, Llantwit Road, Pontypridd, CF37 1DL, United Kingdom AECC University College, Parkwood Campus, Bournemouth, England, BH5 2DF, United Kingdom	Canada, United Kingdom	https://doi.org/10.1186/s12998-020-00318-5	English	Review	2020	Chiropractic and Manual Therapies	Yes	N/A	Chiropractic
Comment on Melatonin as a potential adjuvant treatment for COVID-19	Herrera EA, González-Candia A	Laboratorio de Función y Reactividad Vascular, Programa de Fisiopatología, ICBM, Facultad de Medicina, Universidad de Chile, Chile	Chile	https://doi.org/10.1016/j.lfs.2020.117739	English	Note	2020	Life Sciences	No	3.448	Melatonin
Commentary: Myths and facts on vitamin D amidst the COVID-19 pandemic	Chakhtoura M, Napoli N, El Hajj Fuleihan G	Calcium Metabolism and Osteoporosis Program, American University of Beirut Medical Center, Beirut, Lebanon Scholars in HeAlth Research Program (SHARP), American University of Beirut Medical Center, Beirut, Lebanon Unit of Endocrinology and Diabetes, Department of Medicine, Università Campus Bio-Medico di Roma, Via Alvaro di Portillo 21, 00128, Roma, Italy Division of Bone and Mineral Diseases, Wa…	Lebanon, Italy, United States	https://doi.org/10.1016/j.metabol.2020.154276	English	Article	2020	Metabolism - Clinical and Experimental	No	6.513	Vitamin D
Consideration of traditional Chinese medicine in treatment of highly pathogenic human coronaviruses SARS-CoV-2 and SARS-CoV [中医药治疗人类高致病性冠状病毒SARS-CoV-2与SARS-CoV感染肺炎的思考]	Yang Y-J, E X-H, Ren H-W, He Y, Zhou S-P	Tasly Academy, Tasly Pharmaceutical Group Co., Ltd., Tianjin, 300410, China Key Laboratory of Critical Technology in Innovative Chinese Medicine, Tasly Pharmaceutical Group Co., Ltd., Tianjin, 300410, China	China	https://doi.org/10.7501/j.issn.0253-2670.2020.06.007	Chinese	Article	2020	Chinese Traditional and Herbal Drugs	Yes	N/A	TCM
Considerations for obesity, vitamin D, and physical activity amidst the COVID-19 pandemic	Carter SJ, Baranauskas MN, Fly AD	Department of Kinesiology, School of Public Health, Indiana University, Bloomington, 47405, United States Department of Applied Health Sciences, School of Public Health, Indiana University, Bloomington, 47405, United States	United States	https://doi.org/10.1002/oby.22838	English	Article	2020	Obesity	No	3.969	Vitamin D
Correspondence COVID-19: Melatonin as a potential adjuvant treatment	Salles C	Bahiana's School of Medicine and Public Health, Salvador, Brazil	Brazil	https://doi.org/10.1016/j.lfs.2020.117716	English	Letter	2020	Life Sciences	No	3.448	Melatonin
Corrigendum to “Traditional Chinese medicine for COVID-19 treatment” [Pharmacol. Res. 155 (2020) 104743] (Pharmacological Research (2020) 155, (S1043661820307556), (10.1016/j.phrs.2020.104743))	Ren J-L, Zhang A-H, Wang X-J	Engineering Research Center of Efficacy Evaluation and Industrial Development of TCM Classic Formulae of the Ministry of Education, National Chinmedomics Research Center, Sino-America Chinmedomics, Technology Collaboration Center, Heilongjiang University of Chinese Medicine, Heping Road 24, Harbin, China	China	https://doi.org/10.1016/j.phrs.2020.104768	English	Erratum	2020	Pharmacological Research	No	5.574	TCM
COVID-19 and cardiovascular injury: A role for oxidative stress and antioxidant treatment?	Loffredo L, Violi F	Department of Clinical, Internal Medicine, Anesthesiology and Cardiovascular Sciences, Sapienza University of Rome, Italy	Italy	https://doi.org/10.1016/j.ijcard.2020.04.066	English	Letter	2020	International Journal of Cardiology	No	3.471	Antioxidants
COVID-19 and vitamin D-Is there a link and an opportunity for intervention?	Jakovac H	Department of Physiology and Immunology, Medical Faculty, University of Rijeka, Rijeka, Croatia	Croatia	https://doi.org/10.1152/ajpendo.00138.2020	English	Letter	2020	American Journal of Physiology - Endocrinology and Metabolism	No	4.125	Vitamin D
COVID-19 pandemic: A pragmatic plan for ayurveda intervention	Rastogi S, Pandey DN, Singh RH	Dept of Kaya Chikitsa, State Ayurvedic College and Hospital, Lucknow, 226003, India Department of Environment/Forests, Government of Rajasthan, Secretariat, Jaipur, Rajasthan 302005, India Faculty of Ayurveda, Institute of Medical Sciences, Banaras Hindu University, Varanasi, 221005, India	India	https://doi.org/10.1016/j.jaim.2020.04.002	English	Article	2020	Journal of Ayurveda and Integrative Medicine	Yes	N/A	Ayurveda
Covid-19, cocooning and vitamin D intake requirements	McKenna MJ, Flynn MAT	UCD School of Medicine, University College Dublin, Dublin, United Kingdom	Ireland		English	Article	2020	Irish Medical Journal	No	N/A	Vitamin D
COVID-19: Melatonin as a potential adjuvant treatment	Zhang R, Wang X, Ni L, Di X, Ma B, Niu S, Liu C, Reiter RJ	Department of Vascular Surgery, Peking Union Medical College Hospital, Chinese Academy of Medical Sciences and Peking Union Medical College, Beijing, China Department of Cell Systems and Anatomy, UT Health San Antonio, San Antonio, TX 78229, United States	China, United States	https://doi.org/10.1016/j.lfs.2020.117583	English	Review	2020	Life Sciences	No	3.448	Melatonin
Delirium and sleep disturbances in COVID–19: A possible role for melatonin in hospitalized patients?	Zambrelli E, Canevini M, Gambini O, D'Agostino A	Epilepsy Center - Sleep Medicine Center, Childhood and Adolescence Neuropsychiatry Unit, ASST Santi Paolo e Carlo, San Paolo Hospital, Milan, Italy Department of Health Sciences, Università Degli Studi di Milano, Italy Department of Mental Health, ASST Santi Paolo e Carlo, Milan, Italy “Aldo Ravelli” Research Center for Neurotechnology and Experimental Brain Therapeutics, Università Degli Studi d…	Italy	https://doi.org/10.1016/j.sleep.2020.04.006	English	Letter	2020	Sleep Medicine	No	3.36	Melatonin
Diagnosis and treatment of novel coronavirus pneumonia based on the theory of traditional Chinese medicine	Wang S-X, Wang Y, Lu Y-B, Li J-Y, Song Y-J, Nyamgerelt M, Wang X-X	School of Basic Medical Sciences, Lanzhou University, Lanzhou, Gansu Province 730000, China The Second Clinical Medical College, Lanzhou University, Lanzhou, Gansu Province 730000, China Key Laboratory of Evidence-Based Medicine and Knowledge Translation of Gansu Province, Lanzhou, Gansu Province 730000, China	China	https://doi.org/10.1016/j.joim.2020.04.001	English	Review	2020	Journal of Integrative Medicine	Yes	N/A	TCM
Diagnosis and treatment protocol for COVID-19 with traditional Chinese medicine [Protocolo de diagnóstico y tratamiento para COVID-19 mediante medicina tradicional china]	National Health Committee of the People's Republic of China	National Health Commission of the People's Republic of China, State Administration of Traditional Chinese Medicine of the People's Republic of China, Beijin, China	China	https://doi.org/10.1016/j.acu.2020.04.002	English; Spanish	Article	2020	Revista Internacional de Acupuntura (International Journal of Acupuncture)	Yes	N/A	TCM
Discovery of intervention effect of Chinese herbal formulas on COVID-19 pulmonary fibrosis treated by VEGFR and FGFR inhibitors [基于VEGFR, FGFR探讨中药方剂对COVID-19后遗症肺纤维化的干预作用]	Bian Y-Q, Ma J, Ren Y, Zhang Y-L, Qiao Y-J	Key Technology of Traditional Chinese Medicine Pharmacy and New Drug Development Engineering Research Center of Ministry of Education, School of Chinese Materia Medica, Beijing University of Chinese Medicine, Beijing, 102488, China	China	https://doi.org/10.19540/j.cnki.cjcmm.20200315.401	Chinese	Article	2020	Zhongguo Zhongyao Zazhi (China Journal of Chinese Materia Medica)	Yes	N/A	TCM
Does Vitamin D play a role in the management of Covid-19 in Brazil?	Ribeiro H, Santana KVS, Oliver SL, Rondo PHC, Mendes MM, Charlton K, Lanham-New S	Departamento de Saude Ambiental, Faculdade de Saude Publica, Universidade de Sao Paulo, Sao Paulo, SP, Brasil. Programa de Pos-Graduacao em Saude Global e Sustentabilidade, Faculdade de Saude Publica, Universidade de Sao Paulo, Sao Paulo, SP, Brasil. Departamento de Nutricao, Faculdade de Saude Publica, Universidade de Sao Paulo, Sao Paulo, SP, Brasil. Faculty of Health and Medical Sciences, Scho…	Brazil, United Kingdom, Australia	https://doi.org/10.11606/s1518-8787.2020054002545	English	Article	2020	Revista de Saude Publica (Journal of Public Health)	No	1.968	Vitamin D
Does vitamin D status impact mortality from SARS-CoV-2 infection?	Marik PE, Kory P, Varon J	Division of Pulmonary and Critical Care Medicine, Eastern Virginia Medical School, Norfolk, VA 23501, United States Trauma and Life Support Center, Critical, Care Service, University of Wisconsin School of Medicine and Public Health, Madison, WI 53705, United States Department of Critical Care Medicine, United Memorial Medical Center, Houston, TX 77076, United States	United States	https://doi.org/10.1016/j.medidd.2020.100041	English	Editorial	2020	Medicine in Drug Discovery	No	N/A	Vitamin D
Editorial: low population mortality from COVID-19 in countries south of latitude 35 degrees North supports vitamin D as a factor determining severity	Rhodes JM, Subramanian S, Laird E, Kenny RA	Department of Cellular and Molecular Physiology, Institute of Translational Medicine, University of Liverpool, Liverpool, United Kingdom The Irish Longitudinal Study on Ageing, School of Medicine, Trinity College Dublin, Dublin, Ireland Department of Medical Gerontology, Mercers Institute for Ageing, St James Hospital, Dublin 8, Ireland	United Kingdom, Ireland	https://doi.org/10.1111/apt.15777	English	Editorial	2020	Alimentary Pharmacology and Therapeutics	No	7.731	Vitamin D
Editorial: low population mortality from COVID-19 in countries south of latitude 35 degrees North—supports vitamin D as a factor determining severity. Authors' reply	Garg M, Al-Ani A, Mitchell H, Hendy P, Christensen B	Department of Gastroenterology, Northern Hospital, Melbourne, Vic., Australia Department of Gastroenterology, Royal Melbourne Hospital, Melbourne, Vic., Australia Department of Medicine, University of Melbourne, Melbourne, VIC, Australia Eastern Health Clinical School, Monash University, Melbourne, VIC, Australia Department of Gastroenterology, Chelsea and Westminster Hospital NHS Trust, London, …	Australia	https://doi.org/10.1111/apt.15796	English	Editorial	2020	Alimentary Pharmacology and Therapeutics	No	7.731	Vitamin D
Efficacy and safety of acupuncture therapy for COVID-19: A protocol for systematic review and meta-analysis	Huang S, Wang S, Wang M, Rong J, Yu W, Li J, Han J, Yang D	Shandong University of Traditional Chinese Medicine. People's Hospital of Lixia District, Jinan. Weifang Hospital of Traditional Chinese Medicine, Weifang. Affiliated Hospital of Shandong University of Traditional Chinese Medicine, Jinan, Shandong, China.	China	https://doi.org/10.1097/MD.0000000000020407	English	Article	2020	Medicine	No	1.87	Acupuncture
Efficacy and safety of Chinese herbal medicine for Coronavirus disease 2019: A protocol for systematic review and meta-analysis	Yang M, Hu Z, Yue R	Hospital of Chengdu University of Traditional Chinese Medicine, Chengdu, Sichuan Province, P.R. China.	China	https://doi.org/10.1097/MD.0000000000020157	English	Article	2020	Medicine	No	1.87	TCM
Efficacy and safety of Lianhuaqingwen capsules, a repurposed Chinese herb, in patients with coronavirus disease 2019: A multicenter, prospective, randomized controlled trial	Hu K, Guan W-J, Bi Y, Zhang W, Li L, Zhang B, Liu Q, Song Y, Li X, Duan Z, Zheng Q, Yang Z, Liang J, Han M, Ruan L, Wu C, Zhang Y, Jia Z-H, Zhong N-S	Hebei Yiling Hospital, National Key Laboratory of Collateral Disease Research and Innovative Chinese Medicine, Shijiazhuang, Hebei province 050035, China State Key Laboratory of Respiratory Disease, National Clinical Research Center for Respiratory Disease, Guangzhou Institute of Respiratory Health, the First Affiliated Hospital of Guangzhou Medical University, Guangzhou, Guangdong province 51012…	China	https://doi.org/10.1016/j.phymed.2020.153242	English	Article	2020	Phytomedicine	Yes	4.18	TCM
Ethical review of clinical study on intervention with traditional Chinese medicine in new public health emergencies [中医药干预新发突发公共卫生事件临床研究的伦理审查要点]	Gu H, Wang Z-F, Xie Y-M	Institute of Basic Research in Clinical Medicine, China Academy of Chinese Medical Sciences, Beijing, 100700, China	China	https://doi.org/10.19540/j.cnki.cjcmm.20200318.502	Chinese	Article	2020	Zhongguo Zhongyao Zazhi (China Journal of Chinese Materia Medica)	Yes	N/A	TCM
Evaluation of the adjuvant efficacy of natural herbal medicine on COVID-19: A retrospective matched case-control study	Zhang H-T, Huang M-X, Liu X, Zheng X-C, Li X-H, Chen G-Q, Xia J-Y, Hong Z-S	Department of Infectious Disease, Fifth Affiliated Hospital of Sun Yat-sen University, Zhuhai, Guangdong, China	China	https://doi.org/10.1142/S0192415X20500391	English	Article	2020	The American Journal of Chinese Medicine	Yes	N/A	Herbal Medicine
Evidence that vitamin D supplementation could reduce risk of influenza and covid-19 infections and deaths	Grant WB, Lahore H, McDonnell SL, Baggerly CA, French CB, Aliano JL, Bhattoa HP	Sunlight, Nutrition, and Health Research Center, P.O. Box 641603, San Francisco, CA 94164-1603, United States 2289 Highland Loop, Port Townsend, WA 98368, United States GrassrootsHealth, Encinitas, CA 92024, United States Department of Laboratory Medicine, Faculty of Medicine, University of Debrecen, Nagyerdei Blvd 98, Debrecen, H-4032, Hungary	United States, Hungary	https://doi.org/10.3390/nu12040988	English	Review	2020	Nutrients	No	4.171	Vitamin D
Exploration on scientific connotation of TCM syndromes and recommended prescriptions against COVID-19 based on TCMTP V2.0 [基于TCMIP V2.0探析新型冠状病毒肺炎全病程中医证候和推荐方剂的科学内涵]	Xu H-Y, Zhang Y-Q, Qing Y-W, Zhao H-Y, Wang P, Liu F	Institute of Chinese Materia Medica, China Academy of Chinese Medical Sciences, Beijing, 100700, China Shaanxi Institute of International Trade & Commerce, Xi'an, 712046, China Tianjin University of Traditional Chinese Medicine, Tianjin, 301617, China	China	https://doi.org/10.19540/j.cnki.cjcmm.20200229.401	Chinese	Article	2020	Zhongguo Zhongyao Zazhi (China Journal of Chinese Materia Medica)	Yes	N/A	TCM
Feasibility analysis on acupuncture therapy for the treatment of Corona Virus Disease 2019 and the exploration on the application scheme	Wang R-Q, Liu J-X, Zhang Z, Wen J, Han P, Wu H-H, Jia Y-J, Jia C-S, Pan L-J	Institute of Acupuncture Moxibustion and Massage of Hebei University of Chinese Medicine, Shijiazhuang, 050200, China	China	https://doi.org/10.13702/j.1000-0607.200275	Chinese	Article	2020	Zhen Ci Yan Jiu (Acupuncture Research)	Yes	N/A	Acupuncture
Glycyrrhetinic acid and its derivatives as potential alternative medicine to relieve symptoms in non-hospitalized COVID-19 patients	Ding H, Deng W, Ding L, Ye X, Yin S, Huang W	Key Laboratory of Combinatorial Biosynthesis and Drug Discovery, Ministry of Education, Wuhan University School of Pharmaceutical Sciences, Wuhan University, Wuhan, China Department of Neurology, Massachusetts General Hospital, MA, Boston Department of anatomy, school of basic medical sciences, Wuhan University, Wuhan, China Department of Respiratory Diseases, Second Affiliated Hospital of Nancha…	China, United States	https://doi.org/10.1002/jmv.26064	English	Article	2020	Journal of Medical Virology	No	2.049	Glycyrrhetinic Acid
Guidelines on acupuncture and moxibustion intervention for COVID-19 (second edition) [Guía sobre el uso de acupuntura y moxibustión para tratar COVID-19 (segunda edición)]	Grupo de expertos de la Asociacion China de Acupuntura-Moxibustion	Asociación China de Acupuntura-Moxibustión, Beijin, China	China	https://doi.org/10.1016/j.acu.2020.04.001	English; Spanish	Article	2020	Revista Internacional de Acupuntura (International Journal of Acupuncture)	Yes	N/A	Acupuncture, Moxibustion
Herbal drugs having antiviral potency can be used in treatment of corona virus disease	Chaddha V	Diploma Pharmacy Department, Laxman Seth Pharmacy College, Shivpuri, Madhya Pradesh, India	India		English	Article	2020	International Journal of Pharmaceutical Sciences Review and Research	No	N/A	Herbal Medicine
Herbal medicine and pattern identification for treating COVID-19: a rapid review of guidelines	Ang L, Lee HW, Choi JY, Zhang J, Soo Lee M	Clinical Medicine Division, Korea Institute of Oriental Medicine, Daejeon, South Korea Korean Convergence Medicine, University of Science and Technology, Daejeon, South Korea Herbal Medicine Research Division, Korea Institute of Oriental Medicine, Daejeon, South Korea School of Korean Medicine & Korean Medicine Hospital Lung Cancer & Pulmonology, Pusan National University, Busan, South Korea Evid…	South Korea, China	https://doi.org/10.1016/j.imr.2020.100407	English	Review	2020	Integrative Medicine Research	Yes	N/A	Herbal Medicine
Herbal medicine for the treatment of coronavirus disease 2019 (COVID-19): A systematic review and meta-analysis of randomized controlled trials	Ang L, Song E, Lee HW, Lee MS	Clinical Medicine Division, Korea Institute of Oriental Medicine, Daejeon 34054, South Korea Korean Convergence Medicine, University of Science and Technology, Daejeon 34113, South Korea Global Strategy Division, Korea Institute of Oriental Medicine, Daejeon 34054, South Korea Department of Preventive Medicine, College of Korean Medicine, Daejeon University, Daejeon 34520, South Korea Herbal Medi…	South Korea	https://doi.org/10.3390/jcm9051583	English	Review	2020	Journal of Clinical Medicine	No	5.688	Herbal Medicine
Herbal medicine for treatment of children diagnosed with COVID-19: A review of guidelines	Ang L, Lee HW, Kim A, Lee JA, Zhang J, Lee MS	Clinical Medicine Division, Korea Institute of Oriental Medicine, Daejeon, South Korea Korean Convergence Medicine, University of Science and Technology, Daejeon, South Korea Herbal Medicine Research Division, Korea Institute of Oriental Medicine, Daejeon, South Korea Future Medicine Division, Korea Institute of Oriental Medicine, Daejeon, South Korea Hwa-pyeong Institute of Integrative Medicine,…	South Korea, China	https://doi.org/10.1016/j.ctcp.2020.101174	English	Review	2020	Complementary Therapies in Clinical Practice	Yes	1.587	Herbal Medicine
Herbs that might be effective for the management of COVID-19: A bioinformatics analysis on anti-tyrosine kinase property	Sriwijitalai W, Wiwanitkit V	Private Academic Writer/Consultant, Bangkok, Thailand Department of Community Medicine, Dr. DY Patil University, Pune, Maharashtra, India Department of Tropical Medicine, Hainan Medical University, Haikou, China Department of Biological Science, Joseph Ayobabalola University, Ikeji-Arakeji, Nigeria	India, China, Nigeria	https://doi.org/10.4103/jrms.JRMS_312_20	English	Letter	2020	Journal of Research in Medical Sciences	No	1.467	Herbal Medicine
Highlights of traditional Chinese medicine frontline expert advice in the China national guideline for COVID-19	Ho LTF, Chan KKH, Chung VCH, Leung TH	School of Chinese Medicine, Faculty of Medicine, The Chinese University of Hong Kong, Hong Kong United Christian Nethersole Community Health Service - The Chinese University of Hong Kong Chinese Medicine Clinic cum Training and Research Centre (Tai Po District), Hong Kong Jockey Club School of Public Health and Primary Care, Faculty of Medicine, The Chinese University of Hong Kong, Hong Kong	Hong Kong	https://doi.org/10.1016/j.eujim.2020.101116	English	Article	2020	European Journal of Integrative Medicine	Yes	0.948	TCM
Identification of bioactive molecules from tea plant as SARS-CoV-2 main protease inhibitors	Bhardwaj VK, Singh R, Sharma J, Rajendran V, Purohit R, Kumar S	Structural Bioinformatics Lab, CSIR-Institute of Himalayan Bioresource Technology (CSIR-IHBT), Palampur, HP, India Biotechnology division, CSIR-IHBT, Palampur, HP, India Academy of Scientific & Innovative Research (AcSIR), CSIR-IHBT Campus, Palampur, HP, India	India	https://doi.org/10.1080/07391102.2020.1766572	English	Article	2020	Journal of Biomolecular Structure & Dynamics	No	3.31	Tea
Identification of phytochemical inhibitors against main protease of COVID-19 using molecular modeling approaches	Kumar A, Choudhir G, Shukla SK, Sharma M, Tyagi P, Bhushan A, Rathore M	Bioinformatics Laboratory, Uttarakhand Council for Biotechnology (UCB), Biotech Bhawan, Pantnagar ,U.S. Nagar, Uttarakhand 263145, India Advanced Centre for Computational and Applied Biotechnology, Uttarakhand Council for Biotechnology (UCB), Dehradun 248007, India Department of Botany, CCS University, Meerut, India Multidisciplinary Research Unit (MRU), Government Medical College, Haldwani, Utta…	India	https://doi.org/10.1080/07391102.2020.1772112	English	Article	2020	Journal of Biomolecular Structure & Dynamics	No	3.31	Phytochemicals
Identifying potential treatments of COVID-19 from Traditional Chinese Medicine (TCM) by using a data-driven approach	Ren X, Shao X-X, Li X-X, Jia X-H, Song T, Zhou W-Y, Wang P, Li Y, Wang X-L, Cui Q-H, Qiu P-J, Zhao Y-G, Li X-B, Zhang F-C, Li Z-Y, Zhong Y, Wang Z-G, Fu X-J	Shandong University of Traditional Chinese Medicine, Jinan, 250355, China Marine Traditional Chinese Medicine Research Center, Qingdao Academy of Traditional Chinese Medicine, Shandong University of Traditional Chinese Medicine, Qingdao, 266114, China Shandong Engineering and Technology Research Center of Traditional Chinese Medicine, Jinan, 250355, China Affiliated Hospital of Shandong Universit…	China	https://doi.org/10.1016/j.jep.2020.112932	English	Article	2020	Journal of Ethnopharmacology	Yes	3.414	TCM
In silico screening of Chinese herbal medicines with the potential to directly inhibit 2019 novel coronavirus	Zhang D-H, Wu K-L, Zhang X, Deng S-Q, Peng B	Shanghai Health Commission Key Lab of Artificial Intelligence (AI)-Based Management of Inflammation and Chronic Diseases, Sino-French Cooperative Central Lab, Shanghai Pudong Gongli Hospital, Secondary Military Medical University, Shanghai, 200135, China Department of Traditional Chinese Medicine, Shanghai Pudong Gongli Hospital, Secondary Military Medical University, Shanghai, 200135, China Depa…	China	https://doi.org/10.1016/j.joim.2020.02.005	English	Article	2020	Journal of Integrative Medicine	Yes	N/A	TCM
Indigenous knowledge based herbal medicine for corona (COVID-19) treatment	Shinwari ZK, Qaiser M, Nasar MQ, Ali A	National Council for Tibb, Islamabad, Pakistan Botanical Garden, University of Karachi, Karachi, 75270, Pakistan Agriculture Research Institute, Quetta, Balochistan, Pakistan Università Cattolica del Sacro Cuore, Via Emilia Parmense, Piacenza, Italy	Pakistan, Italy	https://doi.org/10.30848/PJB2020-4(13)	English	Article	2020	Pakistan Journal of Botany	No	0.672	Indigenous Medicine, Herbal Medicine
Insights into the inhibitory potential of selective phytochemicals against Mpro of 2019-nCoV: A computer-aided study	Rasool N, Akhtar A, Hussain W	Dr Panjwani Center for Molecular Medicine and Drug Research, International Center for Chemical and Biological Sciences, University of Karachi, Karachi, 75270, Pakistan Department of Life Sciences, University of Management and Technology, Lahore, Pakistan National Center of Artificial Intelligence, Punjab University College of Information Technology, University of the Punjab, Lahore, Pakistan Cent…	Pakistan	https://doi.org/10.1007/s11224-020-01536-6	English	Article	2020	Structural Chemistry	No	1.624	Phytochemicals
Intra-rater and inter-rater reliability of tongue coating diagnosis in traditional Chinese medicine using smartphones: Quasi-Delphi study	Wang ZC, Zhang SP, Yuen PC, Chan KW, Chan YY, Cheung CH, Chow CH, Chua KK, Hu J, Hu Z, Lao B, Leung CC, Li H, Zhong L, Liu X, Liu Y, Liu Z, Lun X, Mo W, Siu SY, Xiong Z, Yeung WF, Zhang RY, Zhang X	School of Chinese Medicine, Hong Kong Baptist University, Kowloon Tong, Kowloon, Hong Kong, HK School of Computing Science, Hong Kong Baptist University, Hong Kong Department of Medicine, University of Hong Kong, Hong Kong Shanghai Ninth People's Hospital, Shanghai Jiao Tong University School of Medicine, CN, Shanghai, China Guangdong Provincial Hospital of Traditional Chinese Medicine, Second Af…	Hong Kong, China	https://doi.org/10.2196/16018	English	Article	2020	JMIR mHealth and uHealth	No	4.301	TCM
Intravenous vitamin C for reduction of cytokines storm in acute respiratory distress syndrome	Boretti A, Banik BK	Prince Mohammad Bin Fahd University, P.O. Box 1664, Al Khobar, 31952, Saudi Arabia	Saudi Arabia	https://doi.org/10.1016/j.phanu.2020.100190	English	Review	2020	PharmaNutrition	No	N/A	Vitamin C
Investigation into SARS-CoV-2 resistance of compounds in garlic essential oil	Thuy BTP, My TTA, Hai NTT, Hieu LT, Hoa TT, Thi Phuong Loan H, Triet NT, Anh TTV, Quy PT, Tat PV, Hue NV, Quang DT, Trung NT, Tung VT, Huynh LK, Nhung NTA	Faculty of Fundamental Science, Van Lang University, 45 Nguyen Khac Nhu Street, Ho Chi Minh City, 700000, Viet Nam Department of Chemistry, University of Sciences, Hue University, 77 Nguyen Hue Street, Hue City, 530000, Viet Nam Faculty of Traditional Medicine, University of Medicine and Pharmacy at Ho Chi Minh City, 217 Hong Bang Street, Ho Chi Minh City, 700000, Viet Nam Faculty of Pharmacy, Un…	Vietnam	https://doi.org/10.1021/acsomega.0c00772	English	Article	2020	ACS Omega	No	2.584	Garlic Essential Oil
Is traditional Chinese medicine useful in the treatment of COVID-19?	Zhang K	Department of Acupuncture and Moxibustion, Tianjin Gong An Hospital, No. 78 Nanjing Road, Heping District Tianjin 300042, China	China	https://doi.org/10.1016/j.ajem.2020.03.046	English	Letter	2020	The American Journal of Emergency Medicine	No	N/A	TCM
La vitamina D è efficace contro la CoViD-19?	De Fiore R			https://doi.org/10.1701/3366.33416	Italian	Article	2020	Recenti Progressi in Medicina (Recent Advances in Medicine)	No	N/A	Vitamin D
Letter: Covid-19, and vitamin D	Panarese A, Shahini E	Department of Gastroenterology and Digestive Endoscopy, National Institute of Gastroenterology, "Saverio De Bellis" Research Hospital, Castellana Grotte (Bari), Italy Istituto di Candiolo, FPO-IRCCS, Candiolo (Torino), Italy	Italy	https://doi.org/10.1111/apt.15752	English	Letter	2020	Alimentary Pharmacology and Therapeutics	No	7.731	Vitamin D
Letter: Covid-19, and vitamin D. Authors' reply	Tian Y, Rong L	Department of Endoscopy Center, Peking University First Hospital, Beijing, China	China	https://doi.org/10.1111/apt.15764	English	Letter	2020	Alimentary Pharmacology and Therapeutics	No	7.731	Vitamin D
Letter: does vitamin D have a potential role against COVID-19?	Kumar D, Gupta P, Banerjee D	Department of Experimental Medicine and Biotechnology, Postgraduate Institute of Medical Education and Research, Chandigarh, India Division of Innovation & Translational Research, Indian Council of Medical Research (ICMR), New Delhi, India	India	https://doi.org/10.1111/apt.15801	English	Letter	2020	Alimentary Pharmacology and Therapeutics	No	7.731	Vitamin D
Letter: does vitamin D have a potential role against COVID-19? Authors' reply	Tian Y, Rong L	Department of Endoscopy Center, Peking University First Hospital, Beijing, China	China	https://doi.org/10.1111/apt.15817	English	Letter	2020	Alimentary Pharmacology and Therapeutics	No	7.731	Vitamin D
Letter: low population mortality from COVID-19 in countries south of latitude 35 degrees North supports vitamin D as a factor determining severity	Mansur J	Universidad Nacional de la Plata Facultad de Ciencias Medicas, Center of Endocrin and Osteop, Buenos Aires, Argentina	Argentina	https://doi.org/10.1111/apt.15820	English	Letter	2020	Alimentary Pharmacology and Therapeutics	No	7.731	Vitamin D
Letter: low population mortality from COVID-19 in countries south of latitude 35 degrees North supports vitamin D as a factor determining severity. Authors' reply	Rhodes JM, Subramanian S, Laird E, Anne Kenny R	Emeritus Professor of Medicine, Department of Cellular and Molecular Physiology, Institute of Translational Medicine, University of Liverpool, Nuffield Building, Crown Street, Liverpool L69 3GE, United Kingdom Irish Longitudinal Study on Ageing, School of Medicine, Trinity College Dublin, Ireland Department of Medical Gerontology, St James Hospital, 6th floor, Dublin, Ireland	United Kingdom, Ireland	https://doi.org/10.1111/apt.15823	English	Letter	2020	Alimentary Pharmacology and Therapeutics	No	7.731	Vitamin D
Lungs as target of COVID-19 infection: Protective common molecular mechanisms of vitamin D and melatonin as a new potential synergistic treatment	Martín Giménez VM, Inserra F, Tajer CD, Mariani J, Ferder L, Reiter RJ, Manucha W	Institute of Research in Chemical Sciences, School of Chemical and Technological Sciences, Cuyo Catholic University, San Juan, Argentina Maimónides University, Buenos Aires, Argentina Department of Cardiovascular Disease, Hospital de Alta Complejidad El Cruce, Calchaqui 5401, Florencio Varela, Provincia de Buenos Aires 1418857983, Argentina Department of Cardiology, Hospital El Cruce Néstor C. Ki…	Argentina, United States	https://doi.org/10.1016/j.lfs.2020.117808	English	Review	2020	Life Sciences	No	3.448	Vitamin D, Melatonin
Marine algal antioxidants as potential vectors for controlling viral diseases	Sansone C, Brunet C, Noonan DM, Albini A	Stazione Zoologica Anton Dohrn, Villa Comunale, Naples, 80121, Italy Laboratory of Vascular Biology and Angiogenesis, IRCCS MultiMedica, Milan, 20138, Italy Department of Biotechnology and Life Sciences, University of Insubria, Varese, 211000, Italy School of Medicine and Surgery, University of Milano-Bicocca, Monza, 20900, Italy	Italy	https://doi.org/10.3390/antiox9050392	English	Article	2020	Antioxidants	No	4.52	Marine Algal Antioxidants
Melatonin inhibits COVID-19-induced cytokine storm by reversing aerobic glycolysis in immune cells: A mechanistic analysis	Reiter RJ, Sharma R, Ma Q, Dominquez-Rodriguez A, Marik PE, Abreu-Gonzalez P	Department of Cell Systems and Anatomy, UT Health San Antonio, San Antonio, TX, United States of America. Department of Cardiology, Hospital Universitario de Canarias, Santa Cruz, Tenerife, Spain. Division of Pulmonary and Critical Care Medicine, Eastern Virginia Medical School, Norfolk, VA, United States of America. Department of Physiology, Faculty of Medicine, University of La Laguna, Tenerife…	United States, Spain	https://doi.org/10.1016/j.medidd.2020.100044	English	Editorial	2020	Medicine in Drug Discovery	No	N/A	Melatonin
Melatonin: Roles in influenza, Covid-19, and other viral infections	Anderson G, Reiter RJ	CRC Scotland & London, London, United Kingdom Department of Cellular and Structural Biology, University of Texas Health Science at San Antonio, San Antonio, TX, United States	United Kingdom, United States	https://doi.org/10.1002/rmv.2109	English	Review	2020	Reviews in Medical Virology	No	3.702	Melatonin
Myth busters: Dietary supplements and COVID-19	Adams KK, Baker WL, Sobieraj DM	University of Connecticut, Storrs, CT, United States Hartford Hospital, Hartford, CT, United States	United States	https://doi.org/10.1177/1060028020928052	English	Note	2020	Annals of Pharmacotherapy	No	2.443	Dietary Supplements
Myths and facts on Vitamin D amidst the COVID-19 pandemic	Chakhtoura M, Napoli N, Fuleihan GEH	Calcium Metabolism and Osteoporosis Program, American University of Beirut Medical Center, Beirut, Lebanon Scholars in HeAlth Research Program (SHARP), American University of Beirut Medical Center, Beirut, Lebanon. Unit of Endocrinology and Diabetes, Department of Medicine, Universita Campus Bio-Medico di Roma, Via Alvaro di Portillo 21, 00128, Roma, Italy Division of Bone and Mineral Diseases, W…	Lebanon, Italy	https://doi.org/10.1016/j.metabol.2020.154276	English	Article	2020	Metabolism - Clinical and Experimental	No	6.513	Vitamin D
Natural product-derived phytochemicals as potential agents against coronaviruses: A review	Mani JS, Johnson JB, Steel JC, Broszczak DA, Neilsen PM, Walsh KB, Naiker M	School of Health, Medical and Applied Sciences, CQUniversity, Bruce Hwy, North Rockhampton, QLD, Australia Institute of Health & Biomedical Innovation (Q-Block), Queensland University of Technology, Kelvin Grove CampusQLD, Australia Centre for Indigenous Health Equity Research, CQUniversity, Bruce Hwy, North Rockhampton, QLD, Australia	Australia	https://doi.org/10.1016/j.virusres.2020.197989	English	Review	2020	Virus Research	No	2.736	Phytochemicals
Network pharmacology-based analysis of the role of traditional chinese herbal medicines in the treatment of COVID-19	Yu S, Wang J, Shen H	Department of Emergency Medicine, Shengjing Hospital of China Medical University, Shenyang, 110004, China	China	https://doi.org/10.21037/apm.2020.03.27	English	Article	2020	Annals of Palliative Medicine	No	1.262	TCM
On the brighter side of COVID-19 induced lockdown: Devising the collateral methods to provide Ayurveda consultation during impasse	Rastogi S, Singh N, Pandey P	Gathiya Clinic, Department of Kaya Chikitsa, State Ayurvedic College and Hospital, Lucknow -226003.	India	https://doi.org/10.1016/j.jaim.2020.05.001	English	Article	2020	Journal of Ayurveda and Integrative Medicine	Yes	N/A	Ayurveda
Optimisation of vitamin D status for enhanced immuno-protection against covid-19	McCartney DM, Byrne DG	School of Biological and Health Sciences, College of Sciences & Health, Technological University Dublin-City Campus, Kevin Street, Dublin, D08 NF82, Ireland Department of Internal Medicine, St. James’s Hospital, James’s Street, Dublin 8, Ireland Dept. of Clinical Medicine, School of Medicine, Trinity College Dublin, Dublin 2, Ireland	Ireland		English	Article	2020	Irish Medical Journal	No	N/A	Vitamin D
Pay attention to situation of SARS-CoV-2 and TCM advantages in treatment of novel coronavirus infection	Liu C-X	Innovation Research Station, Research Center of Modern Chinese Materia Medica, Tianjin Institute of Pharmaceutical Research, Tianjin 300462, China State Key Laboratory of Drug Delivery Technology and Pharmacokinetics, Tianjin Institute of Pharmaceutical Research, Tianjin 300462, China Tianjin Binhai Research Center for Food and Drug Regulatory Science, Tianjin 300462, China	China	https://doi.org/10.1016/j.chmed.2020.03.004	English	Review	2020	Chinese Herbal Medicines	Yes	N/A	TCM
Perspective: Improving vitamin D status in the management of COVID-19	Ebadi M, Montano-Loza AJ	Division of Gastroenterology & Liver Unit, University of Alberta Hospital, AB, Edmonton, Canada Division of Gastroenterology & Liver Unit, University of Alberta Hospital, AB, Edmonton, Canada	Canada	https://doi.org/10.1038/s41430-020-0661-0	English	Review	2020	European Journal of Clinical Nutrition	No	3.114	Vitamin D
Phytotherapeutics and SARS-CoV-2 infection: Potential role of bioflavonoids	Coppola M, Mondola R	Department of Addiction, ASL CN2, Corso Coppino 46, Alba (CN), 12051, Italy Department of Mental Health, ASL CN1, Via Torino 70/B, Saluzzo (CN), 12037, Italy	Italy	https://doi.org/10.1016/j.mehy.2020.109766	English	Letter	2020	Medical Hypotheses	No	1.322	Bioflavonoids
Phytotherapic compounds against coronaviruses: Possible streams for future research	Antonelli M, Donelli D, Maggini V, Firenzuoli F	Institute of Public Health, University of Parma, Parma, Italy CERFIT, Careggi University Hospital, Florence, Italy Terme di Monticelli, Parma, Italy AUSL-IRCCS Reggio Emilia, Reggio Emilia, Italy SCMIC, Reggio Emilia, Italy Referring Center for Phytotherapy of Tuscany Region (CERFIT), Careggi University Hospital, Florence, Italy	Italy	https://doi.org/10.1002/ptr.6712	English	Letter	2020	Phytotherapy Research	Yes	3.766	Phytotherapy
Potential role of vitamin d in the elderly to resist COVID-19 and to slow progression of parkinson’s disease	Hribar CA, Cobbold PH, Church FC	Department of Pathology and Laboratory Medicine, The University of North Carolina at Chapel Hill School of Medicine, Chapel Hill, NC 27759, United States Department of Human Anatomy and Cell Biology, University of Liverpool, Liverpool, L69 3EG, United Kingdom	United States, United Kingdom	https://doi.org/10.3390/brainsci10050284	English	Review	2020	Brain Sciences	No	2.786	Vitamin D
Preliminary study of traditional Chinese medicine for preventing COVID-19 based on data mining [基于数据挖掘预防新型冠状病毒肺炎中医方药初探]	Zhao X, Zhang L-X, Lu X-J	Chengdu University of Traditional Chinese Medicine, Chengdu, 610075, China Sichuan Key Laboratory of Ophthalmopathy Prevention & Cure and Visual Function Protection with TCM, Chengdu, 610075, China Henan University of Traditional Chinese Medicine, Zhengzhou, 450000, China	China	https://doi.org/10.7501/j.issn.0253-2670.2020.05.008	Chinese	Article	2020	Chinese Traditional and Herbal Drugs	Yes	N/A	TCM
Primary understanding of syndrome differentiation treatment of COVID-19 with traditional Chinese medicine based on 3-5 edition of Diagnosis and Treatment of Novel Coronavirus Pneumonia and ancient literatures [结合3～5版《新型冠状病毒感染的肺炎诊疗方案》和古代文献初探新型冠状病毒肺炎的中医药辨治]	Li B-L, Li X-Y, Ren S-P, Liu Z-H	The Hospital of Shanxi University of Traditional Chinese Medicine, Taiyuan, 030024, China	China	https://doi.org/10.7501/j.issn.0253-2670.2020.04.007	Chinese	Article	2020	Chinese Traditional and Herbal Drugs	Yes	N/A	TCM
Probiotics and COVID-19: is there any link?	Akour A	Department of Biopharmaceutics and Clinical Pharmacy, The School of Pharmacy, The University of Jordan Queen Rania Street, Amman, 11942, Jordan. Department of Pharmacy, Faculty of Pharmacy, Al-Zaytoonah University of Jordan Queen Rania Street, Amman, 11942, Jordan.	Jordan	https://doi.org/10.1111/lam.13334	English	Article	2020	Letters in Applied Microbiology	No	1.805	Probiotics
Probiotics and COVID-19: one size does not fit all	Mak JWY, Chan FKL, Ng SC	Center for Gut Microbiota Research, Department of Medicine and Therapeutics, Institute of Digestive Disease, The Chinese University of Hong KongHong Kong Special Administrative Region, China	China	https://doi.org/10.1016/S2468-1253(20)30122-9	English	Letter	2020	The Lancet Diabetes & Endocrinology	No	24.54	Probiotics
Public health approach of ayurveda and yoga for COVID-19 prophylaxis	Tillu G, Chaturvedi S, Chopra A, Patwardhan B	AYUSH Center of Excellence, Center for Complementary and Integrative Health, Savitribai Phule Pune University, Pune, India Dr. D.Y. Patil Vidyapeeth (DPU), Pune, India Center for Rheumatic Diseases, Pune, India	India	https://doi.org/10.1089/acm.2020.0129	English	Note	2020	Journal of Alternative and Complementary Medicine	Yes	1.868	Ayurveda, Yoga
Rapid establishment of traditional Chinese medicine prevention and treatment of 2019-nCoV based on clinical experience and molecular docking	Niu M, Wang R-L, Wang Z-X, Zhang P, Bai Z-F, Jing J, Guo Y-M, Zhao X, Zhan X-Y, Zhang Z-T, Song X-A, Qin E-Q, Wang J-B, Xiao X-H	China Military Institute of Chinese Medicine, Fifth Medical Center of Chinese PLA General Hospital Beijing 100039, China Integrative Medical Center, Fifth Medical Center of Chinese PLA General Hospital Beijing 100039, China Infectious Disease Treatment and Investigation Center, Fifth Medical Center of Chinese PLA General Hospital Beijing 100039, China China Military Institute of Chinese Medicine,…	China	https://doi.org/10.19540/j.cnki.cjcmm.20200206.501	Chinese	Article	2020	Zhongguo Zhongyao Zazhi (China Journal of Chinese Materia Medica)	Yes	N/A	TCM
Reply to “The use of traditional Chinese medicines to treat SARS-CoV-2 may cause more harm than good”	Zhang A-H, Ren J-L, Wang X-J	National Chinmedomics Research Center, Heilongjiang University of Chinese Medicine, Sino-America Chinmedomics Technology Collaboration Center, Heping Road 24, Harbin, China	China	https://doi.org/10.1016/j.phrs.2020.104775	English	Letter	2020	Pharmacological Research	No	5.574	TCM
Reply to Jakovac: About COVID-19 and vitamin D	Facchiano A, Facchiano A, Bartoli M, Ricci A, Facchiano F	National Research Council, CNR-ISA, Avellino, Italy Istituto Dermopatico dell'Immacolata, Italy Department of Ophthalmology, Medical College of Georgia, Augusta University, Augusta, Georgia Department of Clinical and Molecular Medicine, Division of Respiratory Diseases, Sant'Andrea Hospital, Sapienza University of Rome, Rome, Italy Department of Oncology and Molecular Medicine, Istituto Superiore…	Italy, United States	https://doi.org/10.1152/ajpendo.00185.2020	English	Letter	2020	American Journal of Physiology - Endocrinology and Metabolism	No	4.125	Vitamin D
Reply to Jakovac; Severity of COVID-19 infection in patients with phenylketonuria: Is vitamin D status protective?	Rocha JC, Calhau C, MacDonald A	Nutrition & Metabolism, Nova Medical School, Faculdade de Ciencias Medicas, Universidade Nova de Lisboa, Lisbon, Portugal. Center for Health Technology and Services Research (CINTESIS), Porto, Portugal. Nutrition & Metabolism, Nova Medical School, Faculdade de Ciencias Medicas, Universidade Nova de Lisboa, Lisbon, Portugal. Center for Health Technology and Services Research (CINTESIS), Porto, Por…	Portugal, United Kingdom	https://doi.org/10.1152/ajpendo.00195.2020	English	Article	2020	American Journal of Physiology - Endocrinology & Metabolism	No	4.125	Vitamin D
Reply: "Vitamin D supplementation in influenza and COVID-19 infections. Comment on: Evidence that vitamin D supplementation could reduce risk of influenza and COVID-19 infections and deaths"	Grant WB, Baggerly CA, Lahore H	Sunlight, Nutrition, and Health Research Center, P.O. Box 641603, San Francisco, CA 94164-1603, USA. GrassrootsHealth, Encinitas, CA 95101, USA. 2289 Highland Loop, Port Townsend, WA 98368, USA.	United States	https://doi.org/10.3390/nu12061620	English	Article	2020	Nutrients	No	4.171	Vitamin D
Reply: Vitamin C as a possible therapy for COVID-19	Kim SB, Yeom JS	Division of Infectious Diseases, Department of Internal Medicine, Korea University College of Medicine, Seoul, Korea. Department of Internal Medicine, Severance Hospital, Yonsei University College of Medicine, Seoul, Korea.	South Korea		English	Letter	2020	Infection & Chemotherapy	No	N/A	Vitamin C
Repurposing therapeutic agents and herbal medicines to defeat viral nemesis	Caputo L, Lentini G, Habtemariam S	Institute of Sciences of Food Production (CNR-ISPA), National Council of Research, Bari, Italy Department of Pharmacy—Pharmaceutical Sciences, University of Bari Aldo Moro, Bari, Italy Pharmacognosy Research Laboratories and Herbal Analysis Services UK, University of Greenwich, Kent, United Kingdom	Italy, United Kingdom	https://doi.org/10.1002/ddr.21668	English	Note	2020	Drug Development Research	No	1.742	Herbal Medicine
Research progress of intervention of Chinese herbal medicine and its active components on human coronavirus	Zhang Y-S, Cong W-H, Zhang J-J, Guo F-F, Li H-M	Institute of Chinese Materia Medica, China Academy of Chinese Medical Sciences Beijing 100700, China Xiyuan Hospital, China Academy of Chinese Medical Sciences Beijing 100091, China	China	https://doi.org/10.19540/j.cnki.cjcmm.20200219.501	Chinese	Review	2020	Zhongguo Zhongyao Zazhi (China Journal of Chinese Materia Medica)	Yes	N/A	TCM
Research progress on prevention and treatment of cytokine storm with traditional Chinese medicine [中药防治细胞因子风暴的研究进展]	Yin M-X, Cao Y, Shi C-Y, Wang W-Q, Fang J-G	Department of Pharmacy, Tongji Hospital Affiliated to Tongji Medical College, Huazhong University of Science and Technology, Wuhan, 430030, China	China	https://doi.org/10.7501/j.issn.0253-2670.2020.05.001	Chinese	Article	2020	Chinese Traditional and Herbal Drugs	Yes	N/A	TCM
Research strategy of drugs against 2019-novel coronavirus based on supramolecular “qi chromatography” theory of TCM [基于中医药超分子“气析”理论探讨抗新型冠状病毒药物的研究策略]	He F-Y, Deng K-W, Pan X, Zhou Y-Q	College of Pharmacy, Hunan University of Chinese Medicine, Changsha, 410208, China Hunan Key laboratory of Druggability and Preparation Modification of TCM, Changsha, 410208, China Laboratory of Processing and Pharmaceutical Preparation Engineering Technology of TCM, Hunan University of Chinese Medicine, Changsha, 410208, China The First Clinical Hospital of TCM, Hunan University of Chinese Medic…	China	https://doi.org/10.7501/j.issn.0253-2670.2020.03.001	Chinese	Article	2020	Chinese Traditional and Herbal Drugs	Yes	N/A	TCM
Response of chiropractic organizations to the COVID-19 pandemic: A descriptive report	Johnson CD, Little CS, Sterling TA, Gojkovich S, Boghosian K, Ciolfi MA	National University of Health Sciences, Lombard, IL, United States Council on Chiropractic Education, Scottsdale, AZ, United States National Board of Chiropractic Examiners, Greeley, CO, United States National Chiropractic Mutual Insurance Company, Clive, IA, United States Federation of Chiropractic Licensing Boards, Greeley, CO, United States Association of Chiropractic Colleges, Bethesda, MD, U…	United States	https://doi.org/10.1016/j.jmpt.2020.04.001	English	Article	2020	Journal of Manipulative and Physiological Therapeutics	Yes	1.274	Chiropractic
Revisiting vitamin D and home-based exercises for patients with sleep apnea facing the COVID-19 quarantine	Ekiz T, Kara M, Ozcakar L	Turkmenbasi Medical Center, Department of Physical Medicine and Rehabilitation, Adana, Turkey Hacettepe University Medical School, Department of Physical and Rehabilitation Medicine, Ankara, Turkey	Turkey	https://doi.org/10.5664/jcsm.8586	English	Article	2020	Journal of Clinical Sleep Medicine Medicine	No	3.456	Vitamin D, Exercise
SARS-CoV-2 & Covid-19: Key-roles of the 'renin-angiotensin' system / vitamin D impacting drug and vaccine developments	Cao Z, Wu Y, Faucon E, Sabatier J-M	State Key Laboratory of Virology, Modern Virology Research Center, College of Life Sciences, Wuhan University, Wuhan 430072. China Bd Grignan, 252 Université Aix-Marseille, Institut de Neuro-physiopathologie (INP), Faculté de Pharmacie, 27 Bd Jean Moulin	China, France	https://doi.org/10.2174/1871526520999200505174704	English	Editorial	2020	Infectious Disorders Drug Targets	No	N/A	Vitamin D
SARS-CoV2 induced respiratory distress: Can cannabinoids be added to anti-viral therapies to reduce lung inflammation?	Byrareddy SN, Mohan M	Department of Pharmacology and Experimental Neuroscience, University of Nebraska Medical Center, Omaha, NE 68198, United States Texas Biomedical Research Institute, Southwest National Primate Research Center, San Antonio, TX 78227, United States	United States	https://doi.org/10.1016/j.bbi.2020.04.079	English	Letter	2020	Brain, Behavior, and Immunity	No	6.17	Cannabis
SARS-CoV-2 pandemic and Vitamin D deficiency - A double trouble	Alpalhao M, Filipe P	Dermatology Department, Hospital de Santa Maria, Centro Hospitalar Universitario Lisboa Norte EPE, Lisbon, Portugal. Dermatology Universitary Clinic, Faculty of Medicine, University of Lisbon, Lisbon, Portugal. Dermatology Research Unit, iMM Joao Lobo Antunes, University of Lisbon, Lisbon, Portugal. Dermatology Department, Hospital de Santa Maria, Centro Hospitalar Universitario Lisboa Norte EPE,…	Portugal	https://doi.org/10.1111/phpp.12579	English	Letter	2020	Photodermatology, Photoimmunology & Photomedicine	No	2.328	Vitamin D
Scientific strabismus' or two related pandemics: COVID-19 & vitamin D deficiency	Kara M, Ekiz T, Ricci V, Kara Ö, Chang K-V, Özçakar L	Department of Physical Medicine and Rehabilitation, Hacettepe University Medical School, Ankara, Turkey Department of Physical Medicine and Rehabilitation, Türkmenbaşl Medical Center, Adana, Turkey Irccs Rizzoli Orthopaedic Institute, Department of Biomedical and Neuromotor Science Physical and Rehabilitation Medicine Unit, Bologna, Italy Ylldlrlm Beyazlt University, Yenimahalle Training and Rese…	Turkey, Italy, Taiwan	https://doi.org/10.1017/S0007114520001749	English	Article	2020	British Journal of Nutrition	No	3.319	Vitamin D
Structure-based drug designing for potential antiviral activity of selected natural products from Ayurveda against SARS-CoV-2 spike glycoprotein and its cellular receptor	Maurya VK, Kumar S, Prasad AK, Bhatt MLB, Saxena SK	Department of Centre for Advanced Research (CFAR), Faculty of Medicine, King George’s Medical University (KGMU), Lucknow, 226003, India	India	https://doi.org/10.1007/s13337-020-00598-8	English	Article	2020	VirusDisease	No	N/A	Ayurveda, Natural Products
Study on medication regularity of traditional Chinese medicine in treatment of COVID-19 based on data mining	Zhou Z, Zhu C-S, Zhang B	First Affiliated Hospital of Zhengzhou University Zhengzhou 450000, China Beijing University of Chinese Medicine Beijing 100102, China	China	https://doi.org/10.19540/j.cnki.cjcmm.20200220.502	Chinese	Article	2020	Zhongguo Zhongyao Zazhi (China Journal of Chinese Materia Medica)	Yes	N/A	TCM
Study on screening potential traditional Chinese medicines against 2019-nCoV based on Mpro and PLP	Ma J, Huo X-Q, Chen X, Zhu W-X, Yao M-C, Qiao Y-J, Zhang Y-L	State Administration of Traditional Chinese Medicine, Research Center of Traditional Chinese Medicine-Information Engineering, Key Technology of Traditional Chinese Medicine Pharmacy and New Drug Development Engineering Research Center of Ministry of Education, School of Chinese Materia Medica, Beijing University of Chinese Medicine Beijing 102488, China Qingyuan Hospital of Traditional Chinese M…	China	https://doi.org/10.19540/j.cnki.cjcmm.20200216.401	Chinese	Article	2020	Zhongguo Zhongyao Zazhi (China Journal of Chinese Materia Medica)	Yes	N/A	TCM
Suggestions on design of evidence-based traditional Chinese medicine clinical study for new public health emergencies [针对新发突发公共卫生事件循证中医药临床研究设计的建议]	Wang L-X, Xie Y-M	Institute of Basic Research in Clinical Medicine, China Academy of Chinese Medical Sciences, Beijing, 100700, China	China	https://doi.org/10.19540/j.cnki.cjcmm.20200318.501	Chinese	Article	2020	Zhongguo Zhongyao Zazhi (China Journal of Chinese Materia Medica)	Yes	N/A	TCM
Synergistic effect of vitamin D and Remdesivir can fight COVID-19	Arya A, Dwivedi VD	Center for Bioinformatics, Computational and Systems Biology, Pathfinder Research and Training Foundation, Greater Noida, India	India	https://doi.org/10.1080/07391102.2020.1773929	English	Letter	2020	Journal of Biomolecular Structure & Dynamics	No	3.31	Vitamin D
TCM in the fight against COVID-19?: The traditional medicine from the Far East is expected to become an export hit, the benefit is unclear [TCM im Kampf gegen COVID-19?]	[No author name available]				German	Article	2020	Deutsche Apotheker Zeitung (German Pharmacist Newspaper)	No	N/A	TCM
TCMATCOV-a bioinformatics platform to predict efficacy of TCM against COVID-19 [中药抗COVID-19药效预测分析平台构建及常用中药潜在作用分析]	Guo F-F, Zhang Y-Q, Tang S-H, Tang X, Xu H, Liu Z-Y, Huo R-L, Li D, Yang H-J	Institute of Chinese Materia Medica, China Academy of Chinese Medical Sciences, Beijing, 100700, China Hebei University, Baoding, 071002, China State Key Laboratory of Proteomics, Beijing Proteome Research Center, Beijing Institute of Radiation Medicine, National Center for Protein Sciences (The PHOENIX Center, Beijing), Beijing, 102206, China China Academy of Chinese Medical Sciences, Beijing, 1…	China	https://doi.org/10.19540/j.cnki.cjcmm.20200312.401	Chinese	Article	2020	Zhongguo Zhongyao Zazhi (China Journal of Chinese Materia Medica)	Yes	N/A	TCM
The benefits of meditation and mindfulness practices during times of crisis such as Covid-19	Behan C			https://doi.org/10.1017/ipm.2020.38	English	Article	2020	Irish Journal of Psychological Medicine	No	N/A	Meditation, Mindfulness
The important role of polysaccharides from a traditional Chinese medicine-lung cleansing and detoxifying decoction against the COVID-19 pandemic	Cao P, Wu S, Wu T, Deng Y, Zhang Q, Wang K, Zhang Y	Department of Pharmacy, Union Hospital, Tongji Medical College, Huazhong University of Science and Technology, Wuhan, 430022, China Hubei Province Clinical Research Center for Precision Medicine for Critical Illness, Wuhan, 430022, China School of Pharmacy, Tongji Medical College, Huazhong University of Science and Technology, Wuhan, 430030, China	China	https://doi.org/10.1016/j.carbpol.2020.116346	English	Review	2020	Carbohydrate Polymers	No	6.044	TCM
The potential application of the traditional Chinese herb Exocarpium Citri grandis in the prevention and treatment of COVID-19	Su W-W, Wang Y-G, Li P-B, Wu H, Zeng X, Shi R, Zheng Y-Y, Li P-L, Peng W	Guangdong Engineering & Technology Research Center for Quality and Efficacy Reevaluation of Post-Market Traditional Chinese Medicine, Guangdong Provincial Key Laboratory of Plant Resources, School of Life Sciences, Sun Yat-Sen University, Guangzhou 510275, China	China	https://doi.org/10.12032/TMR20200406172	English	Review	2020	Traditional Medicine Research	Yes	N/A	TCM
The potential insights of Traditional Chinese Medicine on treatment of COVID-19	Tong T, Wu Y-Q, Ni W-J, Shen A-Z, Liu S	Department of Pharmacy, Anhui Provincial Hospital, First Affiliated Hospital of USTC, Division of Life Sciences and Medicine, University of Science and Technology of China, Hefei, Anhui, 230001, China	China	https://doi.org/10.1186/s13020-020-00326-w	English	Review	2020	Chinese Medicine	Yes	2.265	TCM
The potential use of Persian herbal medicines against COVID-19 through angiotensin-converting enzyme 2	Heidary F, Varnaseri M, Gharebaghi R	Head of Ophthalmology Division, Taleghani Hospital, Ahvaz Jundishapur University of Medical Sciences, Padad Shahr, Ahvaz, Iran Infectious Diseases Department, Razi Hospital, Ahvaz Jundishapur University of Medical Sciences, Ahvaz, Iran Kish International Campus, University of Tehran, Tehran, Iran	Iran	https://doi.org/10.5812/archcid.102838	English	Letter	2020	Archives of Clinical Infectious Diseases	No	N/A	Traditional Persian Medicine
The pros and cons of traditional Chinese medicines in the treatment of COVID-19	Wang Y, Zeng X, Zhao Y, Chen W, Chen YZ	The Institute of Drug Discovery Technology, Ningbo University, Ningbo, 315211, China Bioinformatics and Drug Design Group, Department of Pharmacy, National University of Singapore117543, Singapore Department of Biological Medicines & Shanghai Engineering Research Center of Immunotherapeutics, Fudan University School of Pharmacy, Shanghai, 201203, China Key Lab of Agricultural Products Processing …	China	https://doi.org/10.1016/j.phrs.2020.104873	English	Letter	2020	Pharmacological Research	No	5.574	TCM
The role of vitamin D in the prevention of coronavirus disease 2019 infection and mortality	Ilie PC, Stefanescu S, Smith L	Research and Innovation Department, The Queen Elizabeth Hospital Foundation Trust, King’s Lynn, United Kingdom The University of East Anglia, Norfolk, United Kingdom The Cambridge Centre for Sport and Exercise Sciences, Anglia Ruskin University, Cambridge, United Kingdom	United Kingdom	https://doi.org/10.1007/s40520-020-01570-8	English	Article	2020	Aging Clinical and Experimental Research	No	2.331	Vitamin D
The use of internet analytics by a Canadian provincial chiropractic regulator to monitor, evaluate and remediate misleading claims regarding specific health conditions, pregnancy, and COVID-19	Kawchuk G, Hartvigsen J, Innes S, Simpson JK, Gushaty B	University of Alberta, Edmonton, Canada University of Southern Denmark, Odense, Denmark Nordic Institute of Chiropractic and Clinical Biomechanics, Odense, Denmark Murdoch University, Perth, Australia No Affiliation, Edmonton, Canada	Canada, Denmark, Australia	https://doi.org/10.1186/s12998-020-00314-9	English	Article	2020	Chiropractic and Manual Therapies	Yes	N/A	Chiropractic
The use of traditional Chinese medicine (TCM)/acupuncture in the treatment and prevention of SARS-CoV-2 infections: White paper from the Scientific Chapter of the German Medical Association for Acupuncture [German]	Fleckenstein J, Fuzeki E, Banzer W	Institut fur Komplementare und Integrative Medizin IKIM, Dozentur fur TCM/Akupunktur, Universitat Bern, Freiburgstr. 46, Haus 4, Bern 3010, Switzerland Institut fur Arbeits-, Sozial- und Umweltmedizin, Universitatsklinikum Frankfurt, Theodor-Stern-Kai 7, Haus 9B, Frankfurt am Main 60590, Germany	Switzerland, Germany	https://doi.org/10.1007/s42212-020-00271-7	German	Review	2020	Deutsche Zeitschrift fur Akupunktur (German Journal for Acupuncture)	Yes	N/A	TCM
The use of Traditional Chinese Medicines to treat SARS-CoV-2 may cause more harm than good	Gray PE, Belessis Y	Dept. of Immunology and Infectious Diseases, Sydney Children's Hospital, Sydney, Australia School of Women's and Children's Health, University of New South Wales, Sydney, Australia Dept. of Respiratory Medicine, Sydney Children's Hospital, Sydney, Australia	Australia	https://doi.org/10.1016/j.phrs.2020.104776	English	Letter	2020	Pharmacological Research	No	5.574	TCM
Therapeutic algorithm for use of melatonin in patients With COVID-19	Reiter RJ, Abreu-Gonzalez P, Marik PE, Dominguez-Rodriguez A	Department of Cell Systems and Anatomy, UT Health San Antonio, San Antonio, TX, United States Department of Physiology, Faculty of Medicine, University of La Laguna, San Cristóbal de La Laguna, Spain Division of Pulmonary and Critical Care Medicine, Eastern Virginia Medical School, Norfolk, VA, United States Department of Cardiology, Hospital Universitario de Canarias, Santa Cruz de Tenerife, Spa…	United States, Spain	https://doi.org/10.3389/fmed.2020.00226	English	Review	2020	Frontiers in Medicine	No	3.113	Melatonin
Therapeutic targets and signaling mechanisms of vitamin C activity against sepsis: A bioinformatics study	Li R, Guo C, Li Y, Qin Z, Huang W			https://doi.org/10.1093/bib/bbaa079	English	Article	2020	Briefings in Bioinformatics	No	9.101	Vitamin C
Thinking on clinical rational use of TCM injection in the treatment of novel coronavirus pneumonia (COVID-19)	Wang ZF, Wang YP, Zhang HM, Fan YP, Lü C, Wang YY	Institute of Basic Research in Clinical Medicine, China Academy of Chinese Medical Sciences Beijing 100700, China Institute of Chinese Materia Medica, China Academy of Chinese Medical Sciences Beijing 100700, China	China	https://doi.org/10.3760/cma.j.issn.cn112137-20200221-00388	Chinese	Article	2020	Zhonghua Yi Xue Za Zhi (Chinese Medical Journal)	No	N/A	TCM
Thoughts on prevention and treatment of coronavirus disease 2019 (COVID-19) by traditional Chinese medicine [新型冠状病毒肺炎（COVID-19）中医药防治的思考]	Chen J, Wang W-Q, Shi C-Y, Fang J-G	Department of Pharmacy, Tongji Hospital of Tongji Medical College of Huazhong University of Science and Technology, Wuhan, 430030, China	China	https://doi.org/10.7501/j.issn.0253-2670.2020.05.003	Chinese	Article	2020	Chinese Traditional and Herbal Drugs	Yes	N/A	TCM
Time to realise the true potential of Ayurveda against COVID-19	Golechha M	Health Systems and Health Policy, Indian Institute of Public Health-Gandhinagar, India	India	https://doi.org/10.1016/j.bbi.2020.05.003	English	Letter	2020	Brain, Behavior, and Immunity	No	6.17	Ayurveda
Traditional Chinese herbal medicine for treating novel coronavirus (COVID-19) pneumonia: Protocol for a systematic review and meta-Analysis	Li Y, Liu X, Guo L, Li J, Zhong D, Zhang Y, Clarke M, Jin R	School of Acupuncture-Moxibustion and Tuina, Chengdu University of Traditional Chinese Medicine, Chengdu, China School of Health Preservation and Rehabilitation, Chengdu University of Traditional Chinese Medicine, Chengdu, China Hospital of Chengdu University of Traditional Chinese Medicine, Chengdu, China West China Hospital, Sichuan University, Chengdu, China Northern Ireland Clinical Trials Un…	China, United Kingdom	https://doi.org/10.1186/s13643-020-01343-4	English	Article	2020	Systematic Reviews	No	N/A	TCM
Traditional Chinese medicine contributes to the treatment of COVID-19 patients	Liu L	Academician of Chinese Academy of Engineering President & Chair Professor of Macau University of Science and Technology	China, Macau	https://doi.org/10.1016/j.chmed.2020.04.003	English	Editorial	2020	Chinese Herbal Medicines	Yes	N/A	TCM
Traditional Chinese medicine for COVID-19 treatment	Ren J-L, Zhang A-H, Wang X-J	Engineering Research Center of Efficacy Evaluation and Industrial Development of TCM Classic Formulae of the Ministry of Education, National Chinmedomics Research Center, Sino-America Chinmedomics Technology Collaboration Center, Heilongjiang University of Chinese Medicine, Heping Road 24, Harbin, China	China	https://doi.org/10.1016/j.phrs.2020.104743	English	Letter	2020	Pharmacological Research	No	5.574	TCM
Traditional Chinese medicine for treatment of coronavirus disease 2019: A review	Cui H-T, Li Y-T, Guo L-Y, Liu X-G, Wang L-S, Jia J-W, Liao J-B, Miao J, Zhang Z-Y, Wang L, Wang H-W, Wen W-B	Shandong Provincial Key Laboratory of Animal Cell and Developmental Biology, School of Life Sciences, Shandong University, Qingdao 250100, China College of Traditional Chinese Medicine, Tianjin University of Traditional Chinese Medicine, No.10 Poyanghu Road, Jinghai District, Tianjin 301617, China Department of Integrated Traditional and Western Medicine, Tianjin Second People's Hospital, Tianjin…	China	https://doi.org/10.12032/TMR20200222165	English	Review	2020	Traditional Medicine Research	Yes	N/A	TCM
Traditional Chinese medicine for treatment of COVID-19 based on literature mining of targeting cytokine storm [基于干预细胞因子风暴文献挖掘的中医药治疗重症新型冠状病毒肺炎探讨]	Liu R-P, Ge J-D, Zhong Y, Zheng Q, Sun R	School of Chinese Materia Medica, Beijing University of Chinese Medicine, Beijing, 100029, China Advanced Medical Research Institute, Shandong University, Jinan, 250012, China College of Pharmacy, Shandong University of Traditional Chinese Medicine, Jinan, 250355, China The Second Hospital of Shandong University, Shandong University, Jinan, 250033, China	China	https://doi.org/10.7501/j.issn.0253-2670.2020.05.002	Chinese	Article	2020	Chinese Traditional and Herbal Drugs	Yes	N/A	TCM
Traditional Chinese medicine in the treatment of patients infected with 2019-new coronavirus (SARS-CoV-2): A review and perspective	Yang Y, Islam MS, Wang J, Li Y, Chen X	State Key Laboratory of Quality Research in Chinese Medicine, Institute of Chinese Medical Sciences, University of Macau999078, Macau	Macau	https://doi.org/10.7150/ijbs.45538	English	Review	2020	International Journal of Biological Sciences	No	4.067	TCM
Traditional Chinese medicine is a resource for drug discovery against 2019 novel coronavirus (SARS-CoV-2)	Ling C-Q	School of Traditional Chinese Medicine, Naval Medical University, Shanghai, 200433, China	China	https://doi.org/10.1016/j.joim.2020.02.004	English	Editorial	2020	Journal of Integrative Medicine	Yes	N/A	TCM
Traditional Chinese Medicine treatment of COVID-19	Xu J, Zhang Y	Sichuan Integrative Medicine Hospital, Chengdu, Sichuan Province, China	China	https://doi.org/10.1016/j.ctcp.2020.101165	English	Letter	2020	Complementary Therapies in Clinical Practice	Yes	1.587	TCM
Traditional Chinese Medicine: An effective treatment for 2019 novel coronavirus pneumonia (NCP)	DU H-Z, HOU X-Y, MIAO Y-H, HUANG B-S, LIU D-H	School of Pharmacy, Hubei University of Chinese Medicine, Wuhan, 430065, China Key Laboratory of Drug Quality Control and Pharmacovigilance (Ministry of Education), State Key Laboratory of Natural Medicine, China Pharmaceutical University, Nanjing, 210009, China	China	https://doi.org/10.1016/S1875-5364(20)30022-4	English	Review	2020	Chinese Journal of Natural Medicines	Yes	1.773	TCM
Treatment efficacy analysis of traditional Chinese medicine for novel coronavirus pneumonia (COVID-19): An empirical study from Wuhan, Hubei Province, China	Luo E, Zhang D, Luo H, Liu B, Zhao K, Zhao Y, Bian Y, Wang Y	State Key Laboratory of Quality Research in Chinese Medicine, Institute of Chinese Medical Sciences, University of Macau, Macau First Affiliated Hospital, Liaoning University of Traditional Chinese Medicine, Shenyang, China Medical Treatment Expert Group to Support for Covid-19 Control in Jihe Hospital, Caidian District, Hubei province, Wuhan, China	China	https://doi.org/10.1186/s13020-020-00317-x	English	Article	2020	Chinese Medicine	Yes	2.265	TCM
Treatment of COVID-19 guided by holistic view of traditional Chinese medicine-therapy aimed at both viral and host [中医整体观指导下的COVID-19治疗-同时着眼于病毒和宿主的疗法]	Yuan R, Xin Q-Q, Tang S-H, Cong W-H	Xiyuan Hospital, China Academy of Chinese Medical Sciences, Beijing, 100091, China Institute of Chinese Materia Medica, China Academy of Chinese Medical Sciences, Beijing, 100700, China	China	https://doi.org/10.19540/j.cnki.cjcmm.20200304.501	Chinese	Article	2020	Zhongguo Zhongyao Zazhi (China Journal of Chinese Materia Medica)	Yes	N/A	TCM
Tripartite combination of candidate pandemic mitigation agents: Vitamin D, quercetin, and estradiol manifest properties of medicinal agents for targeted mitigation of the COVID-19 pandemic defined by genomics-guided tracing of SARS-CoV-2 targets in human cells	Glinsky GV	Institute of Engineering in Medicine, University of California, San Diego, 9500 Gilman Dr. MC 0435, La Jolla, CA 92093-0435, USA.	United States	https://doi.org/10.3390/biomedicines8050129	English	Article	2020	Biomedicines	No	N/A	Vitamin D, Quercetin, Estradiol
Understanding of COVID-19 in children from different perspectives of traditional Chinese medicine and western medicine [中西医不同角度对儿童新型冠状病毒肺炎（COVID-19）的认识]	Zhu Y-L, Yang B-B, Wu F	The Children's Hospital, Zhejiang University School of Medicine, National Clinical Research Center for Child Health, Hangzhou, 310003, China	China	https://doi.org/10.7501/j.issn.0253-2670.2020.04.009	Chinese	Article	2020	Chinese Traditional and Herbal Drugs	Yes	N/A	TCM
Understanding of guidance for acupuncture and moxibustion interventions on COVID-19 (Second edition) issued by CAAM	Liu W-H, Guo S-N, Wang F, Hao Y	Institute of Acupuncture and Moxibustion, China Academy of Chinese Medical Sciences, Beijing 100700, China China Association of Acupuncture-Moxibustion, China, China	China	https://doi.org/10.1016/j.wjam.2020.03.005	English, Czech	Article	2020	World Journal of Acupuncture - Moxibustion	Yes	N/A	Acupuncture, Moxibustion
Unravelling lead antiviral phytochemicals for the inhibition of SARS-CoV-2 Mpro enzyme through in silico approach	Gurung AB, Ali MA, Lee J, Farah MA, Al-Anazi KM	Department of Basic Sciences and Social Sciences, North-Eastern Hill University, Shillong, Meghalaya 793022, India Department of Botany and Microbiology, College of Science, King Saud University, Riyadh, 11451, Saudi Arabia Department of Environment and Forest Resources, Chungnam National University, 99 Daehak-ro, Yuseong-gu, Daejeon, 34134, South Korea Genetics Laboratory, Department of Zoology,…	India, Saudi Arabia, South Korea	https://doi.org/10.1016/j.lfs.2020.117831	English	Article	2020	Life Sciences	No	3.448	Phytochemicals
Use of herbal drugs to treat COVID-19 should be with caution	Yang Y	Department of Traditional Chinese Medicine, The Second Affiliated Hospital of Zhejiang University School of Medicine, Hangzhou, 310009, China	China	https://doi.org/10.1016/S0140-6736(20)31143-0	English	Letter	2020	The Lancet	No	59.102	Herbal Medicine
Using probiotics to flatten the curve of coronavirus disease COVID-2019 pandemic	Baud D, Dimopoulou Agri V, Gibson GR, Reid G, Giannoni E	Materno-Fetal and Obstetrics Research Unit, Department Woman-Mother-Child, Lausanne University Hospital, University of Lausanne, Lausanne, Switzerland Clinic of Neonatology, Department Woman-Mother-Child, Lausanne University Hospital, University of Lausanne, Lausanne, Switzerland Food and Nutritional Sciences, St Joseph's Hospital, The University of Reading, Reading, United Kingdom Department of …	Switzerland, United Kingdom, Canada	https://doi.org/10.3389/fpubh.2020.00186	English	Article	2020	Frontiers in Public Health	No	2.031	Probiotics
Vitamin C and coronavirus	Simonson W	Oregon State University, Corvallis, OR, United States	United States	https://doi.org/10.1016/j.gerinurse.2020.05.002	English	Article	2020	Geriatric Nursing	No	1.517	Vitamin C
Vitamin C as a possible therapy for COVID-19	Hemila H, Chalker E	Department of Public Health, University of Helsinki, Helsinki, Finland. School of Public Health, University of Sydney, Sydney, Australia.	Finland, Australia		English	Letter	2020	Infection & Chemotherapy	No	N/A	Vitamin C
Vitamin D and coronavirus: A new field of use? [Vitamina D e coronavirus: Un nuovo campo di impiego?]	Maestri E, Formoso G, da Cas R, Mammarella F, Guerrizio MA, Trotta F	Azienda USL, IRCCS di Reggio Emilia, Ambulatorio di Endocrinologia, Guastalla (Reggio Emilia), Italy Istituto Superiore di Sanità (ISS), Roma, Italy Agenzia Italiana del Farmaco (AIFA), Roma, Italy	Italy	https://doi.org/10.1701/3347.33188	Italian	Article	2020	Recenti Progressi in Medicina (Recent Advances in Medicine)	No	N/A	Vitamin D
Vitamin d and covid-19: A note of caution	Rabbitt L, Slattery E	Department of Clinical Pharmacology and Therapeutics, University Hospital Galway, Ireland Department of Gastroenterology, University Hospital Galway, Ireland	Ireland		English	Letter	2020	Irish Medical Journal	No	N/A	Vitamin D
Vitamin D and inflammation: Potential implications for severity of Covid-19	Laird E, Rhodes J, Kenny RA	The Irish Longitudinal Study on Ageing, School of Medicine, Trinity College Dublin, Ireland Institute of Translational Medicine, University of Liverpool, United Kingdom	Ireland, United Kingdom		English	Article	2020	Irish Medical Journal	No	N/A	Vitamin D
Vitamin D can prevent COVID-19 infection-induced multiple organ damage	Aygun H	Department of Physiology, Faculty of Medicine, Tokat Gaziosmanpasa University, Tokat, 60030, Turkey	Turkey	https://doi.org/10.1007/s00210-020-01911-4	English	Article	2020	Naunyn-Schmiedeberg's Archives of Pharmacology	No	2.058	Vitamin D
Vitamin D deficiency and ARDS after SARS-CoV-2 infection	Faul JL, Kerley CP, Love B, O’neill E, Cody C, Tormey W, Hutchinson K, Cormican LJ, Burke CM	Asthma Research Centre, James Connolly Memorial Asthma Research Centre, Connolly Hospital Blanchardstown, Ireland Department of Pharmacy, Connolly Hospital Blanchardstown, Ireland Department of Microbiology, Connolly Hospital Blanchardstown and Department of Clinical Microbiology, Royal College of Surgeons in Ireland, Ireland Department of Intensive Care Medicine, Connolly Hospital Blanchardstown…	Ireland		English	Note	2020	Irish Medical Journal	No	N/A	Vitamin D
Vitamin D deficiency and COVID-19 pandemic	Zemb P, Bergman P, Camargo CA Jr, Cavalier E, Cormier C, Courbebaisse M, Hollis B, Minisola S, Pilz S, Pludowski P, Schmitt F, Zdrenghea M, Souberbielle JC	Gynecology department, centre hospitalier de Lorient, France. Department of Laboratory Medicine, Karolinska Institutet, Stockholm, Sweden. Department of Emergency Medicine, Massachusetts General Hospital, Harvard Medical School, Boston, MA, USA. Department of Clinical Chemistry, University of Liege, CHU de Liege, Belgium. Department of rheumatology, Cochin hospital, AP-HP, Paris, France. Departme…	France, Sweden, United States, Belgium, Italy, Austria, Poland, Romania	https://doi.org/10.1016/j.jgar.2020.05.006	English	Article	2020	Journal of Global Antimicrobial Resistance	No	2.469	Vitamin D
Vitamin D supplementation in influenza and COVID-19 infections comment on: "Evidence that vitamin D supplementation could reduce risk of influenza and COVID-19 infections and deaths"	Kow CS, Hadi MA, Hasan SS	School of Postgraduate Studies, International Medical University, Kuala Lumpur 57000, Malaysia. School of Pharmacy, Institute of Clinical Sciences, University of Birmingham, Birmingham B15 2TT, UK. School of Applied Sciences, University of Huddersfield, Huddersfield HD1 3DH, UK.	Malaysia, United Kingdom	https://doi.org/10.3390/nu12061626	English	Article	2020	Nutrients	No	4.171	Vitamin D
Vitamin D, COVID-19 and children	Molloy EJ, Murphy N	Paediatrics, Trinity College, The University of Dublin, Dublin, Ireland Trinity Translational Medicine Institute (TTMI) & Trinity Research in Childhood Centre (TRICC), Trinity College Dublin, Dublin, Ireland Paediatrics & Neonatology, Children’s Hospital Ireland (CHI), Tallaght & Crumlin, Dublin, Ireland Coombe Women and Infants University Hospital, Dublin, Ireland Endocrinology, CHI, Temple St, …	Ireland		English	Article	2020	Irish Medical Journal	No	N/A	Vitamin D
Vitamin D: A simpler alternative to tocilizumab for trial in COVID-19?	Silberstein M	School of Molecular and Life Sciences, Curtin University, Perth, WA, Australia	Australia	https://doi.org/10.1016/j.mehy.2020.109767	English	Letter	2020	Medical Hypotheses	No	1.322	Vitamin D
Vitamin D3 administration to patients with confirmed COVID-19	Rashedi J, Mahdavi Poor B, Asgharzadeh M	Department of Laboratory Sciences, School of Paramedicine, Tabriz University of Medical Sciences, Tabriz, Iran Biotechnology Research Center, Tabriz University of Medical Sciences, Tabriz, Iran	Iran		English	Letter	2020	Iranian Journal of Public Health	No	1.225	Vitamin D
Vitamin-D and COVID-19: Do deficient risk a poorer outcome?	Mitchell F			https://doi.org/10.1016/S2213-8587%2820%2930183-2	English	Article	2020	The Lancet Gastroenterology & Hepatology	No	12.856	Vitamin D
Vitamin-D: An immune shield against nCOVID-19	Jeyaraman M, Gulati A, Anudeep TC, Shetty DU, Latha S, Ajay SS, Jain R, Santosh M	Department of Orthopedics, School of Medical Sciences and Research, Sharda University, Greater Noida, Uttar Pradesh, India Department of Orthopedics, Kalpana Chawla Government Medical College & Hospital, Karnal, Haryana, India Department of Plastic Surgery, Topiwala National Medical College and BYL Nair Ch. Hospital, Mumbai, Maharashtra, India Department of Pulmonary Medicine, St. John's Medical …	India	https://doi.org/10.31782/IJCRR.2020.12095	English	Article	2020	International Journal of Current Research and Review	No	N/A	Vitamin D
Zinc iodide in combination with dimethyl sulfoxide for treatment of SARS-CoV-2 and other viral infections	Hoang BX, Hoang HQ, Han B	Nimni-Cordoba Tissue Engineering and Drug Discovery Laboratory, Division of Plastic and Reconstructive Surgery, Department of Surgery, Keck School of Medicine, University of Southern California, 1333 San Pablo Street, BMT-302, Los Angeles, CA 90033, United States Natural Health Medical Center, 4469 Redondo Beach Boulevard, Lawndale, CA 90260, United States	United States	https://doi.org/10.1016/j.mehy.2020.109866	English	Article	2020	Medical Hypotheses	No	1.322	Zinc Iodide, Dimethyl Sulfoxide

## Sheet: TICAM COVID19 Eligible Articles
Article Title	Author Names	Affiliations	Author Affiliated Countries [Listed in the Order of Affiliations if More Than One Country]	Digital Object Identifer	Language of Publication	Publication Type [As Indexed by the Academic Databases]	Year of Publication	Journal	TICAM-Focussed Journal	2019 Journal Impact Factor [As Per Journal Citation Reports]	TICAMs Mentioned
[Analysis on the theory and clinical ideas of acupuncture and moxibustion for the prevention and treatment of coronavirus disease 2019]. [Chinese]	Liu B Wang H Zhou ZY Chang XR Zhang W Liu BY	Liu, Bing. Institute of Acupuncture and Moxibustion, China Academy of Chinese Medical Sciences, Beijing 100700, China. Wang, Hua. Hubei University of CM. Zhou, Zhong-Yu. Department of Acupuncture and Moxibustion, Hubei Provincial Hospital of TCM. Chang, Xiao-Rong. Acupuncture-Moxibustion and Tuina School of Hunan University of CM. Zhang, Wei. First Affiliated Hospital of Hunan University of CM. L…	China	https://dx.doi.org/10.13703/j.0255-2930.20200305-k0004	Chinese	Journal Article	2020	Zhongguo Zhenjiu	Yes	N/A	Acupuncture, Moxibustion
A brief review of interplay between vitamin D and angiotensin-converting enzyme 2: Implications for a potential treatment for COVID-19.	Malek Mahdavi A.	(Malek Mahdavi) Connective Tissue Diseases Research Center, Tabriz University of Medical Sciences, Tabriz, Iran, Islamic Republic of	Iran	http://dx.doi.org/10.1002/rmv.2119	English	Review	2020	Reviews in Medical Virology	No	4.221	Vitamin D
A molecular modeling approach to identify effective antiviral phytochemicals against the main protease of SARS-CoV-2.	Islam R. Parves M.R. Paul A.S. Uddin N. Rahman M.S. Mamun A.A. Hossain M.N. Ali M.A. Halim M.A.	(Islam, Parves, Paul, Uddin, Rahman, Hossain, Ali, Halim) Division of Computer Aided Drug Design, The Red-Green Research Centre, BICCB, Dhaka, Bangladesh (Uddin, Rahman) Department of Chemistry and Biochemistry, South Dakota State University, Brookings, SD, United States (Mamun) Key Laboratory of Soft Chemistry and Functional Materials of MOE, School of Chemical Engineering, Nanjing University of…	Bangladesh, United States, China	http://dx.doi.org/10.1080/07391102.2020.1761883	English	Article	2020	Journal of Biomolecular Structure and Dynamics	No	N/A	Phytochemicals
A narrative literature review on traditional medicine options for treatment of corona virus disease 2019 (COVID-19)	Mirzaie A., Halaji M., Dehkordi F.S., Ranjbar R., Noorbazargan H.	Molecular Biology Research Center, Systems Biology and Poisonings Institute, Baqiyatallah University of Medical Sciences, Tehran, Iran; Department of Microbiology, School of Medicine, Isfahan University of Medical Sciences, Isfahan, Iran; Halal Research Center of IRI, FDA, Tehran, Iran; School of Advanced Technologies in Medicine, Shahid Beheshti University of Medical Sciences, Tehran, Iran	Iran	10.1016/j.ctcp.2020.101214	English	Review	2020	Complementary Therapies in Clinical Practice	Yes	1.77	TCM
A new clinical trial to test high-dose vitamin C in patients with COVID-19.	Carr A.C.	(Carr) Department of Pathology and Biomedical Science, University of Otago, Christchurch, PO Box 4345, Christchurch 8140, New Zealand	New Zealand	http://dx.doi.org/10.1186/s13054-020-02851-4	English	Letter	2020	Critical Care	No	6.407	Vitamin C
A novel combination of vitamin c, curcumin and glycyrrhizic acid potentially regulates immune and inflammatory response associated with coronavirus infections: A perspective from system biology analysis.	Chen L. Hu C. Hood M. Zhang X. Zhang L. Kan J. Du J.	(Chen, Zhang, Zhang, Kan, Du) Nutrilite Health Institute, 720 Cailun Road, Shanghai 201203, China (Hu) Nutrilite Health Institute, 5600 Beach Boulevard, Buena Park, CA 90621, United States (Hood) Nutrilite Health Institute, 7575 East Fulton Avenue, Ada, MI 49355, United States	China, United States	http://dx.doi.org/10.3390/nu12041193	English	Article	2020	Nutrients	No	4.546	Vitamin C, Curcumin, Glycyrrhizic acid
A perfect storm: Root cause analysis of supra-therapeutic anticoagulation with vitamin K antagonists during the COVID-19 pandemic.	Speed V. Patel R.K. Byrne R. Roberts L.N. Arya R.	(Speed, Patel, Byrne, Roberts, Arya) King's Thrombosis Centre, Department of Haematological Medicine, King's College Hospital NHS Foundation Trust, London, United Kingdom (Speed, Byrne) Institute of Pharmaceutical Sciences, King's College London, London, United Kingdom	England	http://dx.doi.org/10.1016/j.thromres.2020.05.024	English	Letter	2020	Thrombosis Research	No	2.869	Vitamin K Antagonists
A randomized multicenter clinical trial to evaluate the efficacy of melatonin in the prophylaxis of SARS-CoV-2 infection in high-risk contacts (MeCOVID Trial): A structured summary of a study protocol for a randomised controlled trial.	Garcia I.G. Rodriguez-Rubio M. Mariblanca A.R. De Soto L.M. Garcia L.D. Villatoro J.M. Parada J.Q. Meseguer E.S. Rosales M.J. Gonzalez J. Arribas J.R. Carcas A.J. De La Oliva P. Borobia A.M.	(Garcia, Mariblanca, De Soto, Garcia, Villatoro, Parada, Meseguer, Carcas, Borobia) Clinical Pharmacology Department, Clinical Trial Unit, La Paz University Hospital - IdiPAZ, Paseo de la Castellana, 261, Madrid 28046, Spain (Garcia, Rodriguez-Rubio, Mariblanca, De Soto, Garcia, Villatoro, Parada, Meseguer, Rosales, Gonzalez, Arribas, Carcas, De La Oliva, Borobia) School of Medicine, Universidad …	Spain	http://dx.doi.org/10.1186/s13063-020-04436-6	English	Article	2020	Trials	No	1.883	Melatonin
A review of therapeutic agents and Chinese herbal medicines against SARS-COV-2 (COVID-19).	Huang F. Li Y. Leung E.L.-H. Liu X. Liu K. Wang Q. Lan Y. Li X. Yu H. Cui L. Luo H. Luo L.	(Huang, Liu) Graduate School of Guangdong Medical University, Zhanjiang 524023, China (Li) University of Texas Health Science Center at San Antonio, San Antonio, TX 78229, United States (Leung) State Key Laboratory of Quality Research in Chinese Medicine, Macau University of Science and Technology, Macau, SAR, China (Liu, Wang, Lan) The First Clinical College of Guangdong Medical University, Zhan…	China, United States	http://dx.doi.org/10.1016/j.phrs.2020.104929	English	Review	2020	Pharmacological Research	No	5.893	TCM
A review on clinical application of high frequency traditional Chinese medicine in treatment of coronavirus pneumonia 2019. [Chinese]	Shao Z.-B. Zhu Y.-X. Liu S.-H. Jiang K.-J. Wu Q. Shen J.-Y. Liu W.-W.	(Shao, Zhu, Liu, Jiang, Shen, Liu) Jiangsu Ocean University, Lianyungang 222000, China (Wu) Lianyungang Food and Drug Inspection and Testing Center, Lianyungang 222000, China	China	http://dx.doi.org/10.7501/j.issn.0253-2670.2020.05.009	Chinese	Article	2020	Chinese Traditional and Herbal Drugs	Yes	N/A	TCM
A united statement of the global chiropractic research community against the pseudoscientific claim that chiropractic care boosts immunity.	Cote P. Bussieres A. Cassidy J.D. Hartvigsen J. Kawchuk G.N. Leboeuf-Yde C. Mior S. Schneider M. Aillet L. Ammendolia C. Arnbak B. Axen I. Baechler M. Barbier-Cazorla F. Barbier G. Bergstrom C. Beynon A. Blanchette M.-A. Bolton P.S. Breen A. Brinch J. Bronfort G. Brown B. Bruno P. Konner M.B. Burrell C. Busse J.W. Byfield D. Campello M. Cancelliere C. Carroll L. Cedraschi C. Cheron C. Chow N. Chr…	(Cote) Faculty of Health Sciences, Ontario Tech University, Oshawa, Canada (Cote, Mior) Centre for Disability Prevention and Rehabilitation at Ontario Tech University and CMCC, Oshawa, Canada (Cote, Cassidy) Division of Epidemiology, Dalla Lana School of Public Health, University of Toronto, Toronto, Canada (Bussieres) Departement Chiropratique, Universite du Quebec A Trois-Rivieres, Trois-Rivier…	Canada, Denmark, United States	http://dx.doi.org/10.1186/s12998-020-00312-x	English	Review	2020	Chiropractic and Manual Therapies	Yes	1.512	Chiropractic
Active constituents and mechanisms of Respiratory Detox Shot, a traditional Chinese medicine prescription, for COVID-19 control and prevention: Network-molecular docking-LC-MSE analysis.	Zhang Z.-J. Hou J.-J. Zhang L.-L. Li F.-F. Gao L. Wu X.-D. Shi J.-Y. Zhang R. Long H.-L. Lei M. Wu W.-Y. Guo D.-A. Chen K.-X. Hofmann L.A. Ci Z.-H.	(Zhang, Wu, Hou, Zhang, Li, Gao, Wu, Shi, Zhang, Long, Lei, Wu, Guo, Chen) Shanghai Institute of Materia Medica, Chinese Academy of Sciences, Shanghai 201203, China (Wu, Li, Gao, Shi, Zhang) University of Chinese Academy of Sciences, Beijing 100049, China (Hofmann, Ci) World Health Science Organization, Leesburg, VA 20176, United States	China, United States	http://dx.doi.org/10.1016/j.joim.2020.03.004	English	Article	2020	Journal of Integrative Medicine	Yes	2.446	TCM
Acupuncture and moxibustion to treat pneumonia arising from Coronavirus (SARS-CoV-2) infection. [German]	Liang F.	(Liang) School of Chengdu TCM University, 37 Shi-er-qiao Rd., Chengdu, Sichuan 610075, China	China	http://dx.doi.org/10.1007/s00052-020-0261-z	German	Article	2020	Chinesische Medizin	Yes	N/A	Acupuncture, Moxibustion
Acute inflammation and pathogenesis of SARS-CoV-2 infection: Cannabidiol as a potential anti-inflammatory treatment?.	Costiniuk C.T. Jenabian M.-A.	(Costiniuk) Infectious Diseases and Immunity in Global Health, Research Institute of McGill University Health Centre, Montreal, QC, Canada (Costiniuk) Division of Infectious Diseases/Chronic Viral Illness Service, McGill University Health Centre, Montreal, QC, Canada (Costiniuk, Jenabian) Department of Microbiology & Immunology, McGill University, Montreal, QC, Canada (Jenabian) Department of Bio…	Canada	http://dx.doi.org/10.1016/j.cytogfr.2020.05.008	English	Letter	2020	Cytokine and Growth Factor Reviews	No	5.982	Cannabis
Adjustments in analyses of vitamin D status, allowing for vitamin D determinants, for Covid-19 risks.	Boucher BJ	Boucher, Barbara J. The Blizard Institute, Barts & The London School of Medicine & Dentistry, Queen Mary University of London, London E12AT.	England	https://dx.doi.org/10.1002/dmrr.3375	English	Letter	2020	Diabetes/Metabolism Research Reviews	No	3.314	Vitamin D
Advantages of anti-inflammatory acupuncture in treating sepsis of coronavirus disease 2019	Jin G.-Y., Jin L., Zheng J., He B.	International Institute of Systems Medicine Inc., 8412 W. Capitol Drive, Milwaukee, WI 53222, United States; Ace Acupuncture Clinic of Milwaukee, LLC, Milwaukee, WI, United States; Woodlands Acupuncture and Herbal Clinic, The Woodlands, TX, United States	United States	10.4103/wjtcm.wjtcm_12_20	English	Article	2020	World Journal of Traditional Chinese Medicine	Yes	N/A	Acupuncture
An Internet-Based Intervention to Alleviate Stress During Social Isolation With Guided Relaxation and Meditation: Protocol for a Randomized Controlled Trial.	Pizzoli SMF Marzorati C Mazzoni D Pravettoni G	Pizzoli, Silvia Maria Francesca. Department of Oncology and Hemato-Oncology, University of Milan, Milan, Italy. Pizzoli, Silvia Maria Francesca. Applied Research Division for Cognitive and Psychological Science, European Institute of Oncology (Istituto di Ricovero e Cura a Carattere Scientifico), Milan, Italy. Marzorati, Chiara. Applied Research Division for Cognitive and Psychological Science, E…	Italy	https://dx.doi.org/10.2196/19236	English	Journal Article	2020	JMIR Research Protocols	No	5.034	Guided Relaxation, Meditation
Analysis of medication characteristics of traditional Chinese medicine in treating COVID-19 based on data mining. [Chinese]	Fan T. Chen Y. Bai Y. Ma F. Wang H. Yang Y. Chen J. Lin Y.	(Fan, Chen, Lin) College of Basic Medical Sciences, Zhejiang Chinese Medical University, Hangzhou 310053, China (Chen, Bai, Ma, Wang, Yang) Tongde Hospital of Zhejiang Province, Hangzhou 310007, China	China		Chinese	Article	2020	Zhejiang da xue xue bao. Yi xue ban = Journal of Zhejiang University. Medical sciences	Yes	2.082	TCM
Analysis of property and efficacy of traditional Chinese medicine in staging revention and treatment of coronavirus disease 2019. [Chinese]	Gu M. Liu J. Shi N.-N. Li X.-D. Huang Z. Wu J.-K. Wang Y.-G. Wang Y.-P. Zhai H.-Q. Wang Y.-Y.	(Gu, Liu, Zhai) School of Chinese Materia Medica, Beijing University of Chinese Medicine Beijing 102488, China (Shi, Wang, Wang) Institute of Basic Research in Clinical Medicine, China Academy of Chinese Medical Sciences Beijing 100700, China (Li, Huang) Hubei Provincial Hospital of Traditional Chinese Medicine Wuhan 434100, China (Wu, Wang) Beijing Hospital of Traditional Chinese Medicine, Capit…	China	http://dx.doi.org/10.19540/j.cnki.cjcmm.20200225.501	Chinese	Article	2020	Zhongguo Zhong yao za zhi = Zhongguo zhongyao zazhi = China journal of Chinese materia medica	Yes	N/A	TCM
Analysis of TCM in prevention and treatment of post-traumatic stress disorder induced by COVID-19. [Chinese]	Li Y.-F. Zhang Y.-G. Niu J.-T. Si X.-L. Yan X.-K.	(Li, Zhang, Niu, Si, Yan) Gansu University of Chinese Medicine, Lanzhou 730000, China (Li, Zhang, Niu, Si, Yan) Gansu Key Laboratory of Molecular Medicine and Traditional Chinese Medicine for Prevention and Treatment of Major Diseases, Lanzhou 730000, China	China	http://dx.doi.org/10.7501/j.issn.0253-2670.2020.05.006	Chinese	Article	2020	Chinese Traditional and Herbal Drugs	Yes	N/A	TCM
Analysis on clinical study protocols of traditional Chinese medicine for coronavirus disease 2019. [Chinese]	Wang H. Jin X.-Y. Pang B. Liu C.-X. Zheng W.-K. Yang F.-W. Pang W.-T. Zhang J.-H.	(Wang, Jin, Pang, Liu, Zheng, Yang, Pang, Zhang) Evidence-based Medicine Center, Tianjin University of Traditional Chinese Medicine Tianjin 301617, China	China	http://dx.doi.org/10.19540/j.cnki.cjcmm.20200220.501	Chinese	Article	2020	Zhongguo Zhong yao za zhi = Zhongguo zhongyao zazhi = China journal of Chinese materia medica	Yes	N/A	TCM
Analysis on diagnosis and treatment scheme of traditional Chinese medicine in treatment of COVID-19 in Chinese provinces and regions. [Chinese]	Ren W.-Y. Su J. Liu Y.-Q. Hou W.-Q. Zheng Y.-J. Wei B.-J. Jin X.-J. Zhang L.-Y. Zhang Z.-M. Liu D.-L. Ning Y.-M.	(Ren, Su, Liu, Hou, Zheng, Wei, Jin, Zhang, Liu, Ning) Gansu Key Laboratory for Molecular Medicine of Major Diseases and Prevention and Treatment with Traditional Chinese Medicine Research, Gansu University of Chinese Medicine, Lanzhou 730000, China (Liu, Zhang) Gansu Clinical Center for Integrated Prevention and Treatment of Traditional Chinese and Western Medicine, Affiliated Hospital of Gansu …	China	http://dx.doi.org/10.7501/j.issn.0253-2670.2020.05.007	Chinese	Article	2020	Chinese Traditional and Herbal Drugs	Yes	N/A	TCM
Analysis on pattern of prescriptions and syndromes of traditional Chinese medicine for prevention and treatment of COVID-19. [Chinese]	Pang W.-T. Jin X.-Y. Pang B. Yang F.-W. Wang H. Liu C.-X. Zheng W.-K. Zhang J.-H.	(Pang, Jin, Pang, Yang, Wang, Liu, Zheng, Zhang) Evidence-based Medicine Centre, Tianjin University of Traditional Chinese Medicine Tianjin 301617, China	China	http://dx.doi.org/10.19540/j.cnki.cjcmm.20200218.502	Chinese	Article	2020	Zhongguo Zhong yao za zhi = Zhongguo zhongyao zazhi = China journal of Chinese materia medica	Yes	N/A	TCM
Analysis on prevention plan of coronavirus disease 2019 (COVID-19) by traditional Chinese medicine in various regions. [Chinese]	Xu X. Zhang Y. Li X. Li X.-X.	(Xu, Li) Tianjin Key Laboratory of Traditional Chinese Medicine Quality Markers Research, Tianjin Institute of Pharmaceutical Research, Tianjin 300301, China (Zhang) The First Affiliated Hospital of Tianjin University of Traditional Chinese Medicine, Tianjin 300193, China (Li) North China University of Technology, Tangshan 063210, China	China	http://dx.doi.org/10.7501/j.issn.0253-2670.2020.04.006	Chinese	Article	2020	Chinese Traditional and Herbal Drugs	Yes	N/A	TCM
Antiviral Effects of Probiotic metabolites on COVID-19.	Anwar F. Altayb H.N. Al-Abbasi F.A. Al-Malki A.L. Kamal M.A. Kumar V.	(Anwar, Altayb, Al-Abbasi, Al-Malki) Department of Biochemistry, Faculty of Sciences, King Abdulaziz University, Jeddah, Saudi Arabia (Kamal) King Fahd Medical Research Centre, King Abdulaziz University, Jeddah, Saudi Arabia (Kamal) Enzymoics, 7 Peterlee Place (Kamal) Novel Global Community Educational Foundation, Australia (Kumar) Natural Product Discovery Laboratory, Department of Pharmaceutica…	Saudi Arabia, Australia, India	http://dx.doi.org/10.1080/07391102.2020.1775123	English	Article	2020	Journal of biomolecular structure & dynamics	No	N/A	Probiotics
Antiviral mechanisms of candidate chemical medicines and traditional Chinese medicines for SARS-CoV-2 infection.	Li C. Wang L. Ren L.	(Ren) Key Lab for Zoonoses Research, Ministry of Education, Jilin Provincial Key Laboratory of Animal Embryo Engineering, College of Animal Sciences, Jilin University, Changchun 130062, China (Li) Research Unit of Key Technologies for Prevention and Control of Virus Zoonoses, Chinese Academy of Medical Sciences, Military Veterinary Institute, Academy of Military Medical Sciences, Changchun 130122…	China	http://dx.doi.org/10.1016/j.virusres.2020.198073	English	Review	2020	Virus Research	No	2.934	TCM
Antiviral properties of traditional chinese medicine against coronavirus: Research clues for coronavirus disease-2019	Wang X.-J., Li J.-X., Wang M.-R., Zhou Z.-Y., Zhu B.-C., Zhang X.-X., Zhang R., Tang W., Wu Y.-F., Zhang W.-T., Li Q.-Y.	Xiyuan Hospital, China Academy of Chinese Medical Sciences, Beijing, 100091, China; Graduate School, China Academy of Chinese Medical Sciences, Beijing, China; Beijing University of Chinese Medicine, Beijing, China; Community Health Service Center of Beizhuang Town, Beijing, China; Dongzhimen Hospital, Beijing University of Chinese Medicine, Beijing, China	China	10.4103/wjtcm.wjtcm_15_20	English	Review	2020	World Journal of Traditional Chinese Medicine	Yes	N/A	TCM
Application of integrative medicine protocols in treatment of coronavirus disease 2019. [Chinese]	Han Y.-Y. Zhao M.-R. Shi Y. Song Z.-H. Zhou S.-P. He Y.	(Han, Zhao, Shi, Song, Zhou, He) TCM Research Center, Tasly Holding Group Co., Ltd., Tianjin 300410, China (Han, Zhao, Shi, Song, Zhou, He) State Key Laboratory of Critical Technology in Innovative Chinese Medicine, Tasly Pharmaceutical Group Co., Ltd., Tianjin 300410, China (Song) Tianjin University of Traditional Chinese Medicine, Tianjin 301617, China	China	http://dx.doi.org/10.7501/j.issn.0253-2670.2020.04.008	Chinese	Article	2020	Chinese Traditional and Herbal Drugs	Yes	N/A	General CAM
Application of traditional Chinese medicine in prevention and treatment of COVID-19. [Chinese]	Liu J. Cui Y. Bai M.-X. Zhang H.-W. Jin Y.-L. Lv P.	(Liu, Bai, Jin, Lv) Zhengzhou Hospital of Traditional Chinese Medicine, Zhengzhou 450007, China (Cui) Henan College of Chinese Medicine, Zhengzhou 450008, China (Zhang) NMPA Key Laboratory for Quality Control of Chinese Medicinal Materials and Prepared Slices, Henan Institute for Food and Drug Control, Zhengzhou 450018, China	China	http://dx.doi.org/10.7501/j.issn.0253-2670.2020.04.005	Chinese	Article	2020	Chinese Traditional and Herbal Drugs	Yes	N/A	TCM
Are probiotics effective adjuvant therapeutic choice in patients with COVID-19?.	Di Renzo L. Merra G. Esposito E. De Lorenzo A.	(Di Renzo) Section of Clinical Nutrition and Nutrigenomic, Department of Biomedicine and Prevention, University of Tor Vergata, Rome, Italy	Italy	http://dx.doi.org/10.26355/eurrev_202004_20977	English	Letter	2020	European Review for Medical & Pharmacological Sciences	No	3.024	Probiotics
Aromatic Herbs, Medicinal Plant-Derived Essential Oils, and Phytochemical Extracts as Potential Therapies for Coronaviruses: Future Perspectives. [Review]	Boukhatem MN Setzer WN	Boukhatem, Mohamed Nadjib. Departement de Biologie et Physiologie Cellulaire, Faculte des Sciences de la Nature et de la Vie, Universite - Saad Dahlab - Blida 1, BP 270, Blida 09000, Algeria. Setzer, William N. Department of Chemistry, University of Alabama in Huntsville, Huntsville, AL 35899, USA. Setzer, William N. Aromatic Plant Research Center, 230 N 1200 E, Suite 100, Lehi, UT 84043, USA.	Algeria, United States	https://dx.doi.org/10.3390/plants9060800	English	Journal Article Review	2020	Plants	No	2.762	Herbal Medicine, Essential Oils, Phytochemicals
Association between low vitamin D and COVID-19: don't forget the vitamin D binding protein.	Speeckaert M.M. Delanghe J.R.	(Speeckaert) Department of Nephrology, Ghent University Hospital, Corneel Heymanslaan 10, Ghent 9000, Belgium (Speeckaert) Research Foundation-Flanders (FWO), Brussels, Belgium (Delanghe) Department of Diagnostic Sciences, Ghent University, Ghent, Belgium	Belgium	http://dx.doi.org/10.1007/s40520-020-01607-y	English	Letter	2020	Aging Clinical and Experimental Research	No	2.697	Vitamin D
Association of Vitamin D Deficiency and Treatment with COVID-19 Incidence.	Meltzer DO Best TJ Zhang H Vokes T Arora V Solway J		United States	https://dx.doi.org/10.1101/2020.05.08.20095893	English	Preprint	2020	MedRxiv : the Preprint Server for Health Sciences	No	N/A	Vitamin D
Authors of article ‘optimisation of vitamin d status for enhanced immunoprotection against covid-19’ by Mccartney et al (Ir med j; vol 113; no. 4; p58) comment on response report ‘covid-19, cocooning and vitamin d requirements’ by Mckenna et al (ir med j; vol 113; no. 5; p89)	McCartney D.M., Byrne D.G.	School of Biological and Health Sciences, College of Sciences & Health, Technological University Dublin City Campus, Kevin Street, Dublin, D08 NF82, Ireland; Department of Internal Medicine, St. James’s Hospital, James’s Street, Dublin 8, Ireland; Dept. of Clinical Medicine, School of Medicine, Trinity College Dublin, Dublin 2, Ireland	Ireland		English	Editorial	2020	Irish Medical Journal	No	N/A	Vitamin D
Ayurveda and COVID-19: Where psychoneuroimmunology and the meaning response meet.	Rajkumar R.P.	(Rajkumar) Department of Psychiatry, Jawaharlal Institute of Postgraduate Medical Education and Research (JIPMER), Dhanvantari Nagar Post, Pondicherry 605 006, India	India	http://dx.doi.org/10.1016/j.bbi.2020.04.056	English	Review	2020	Brain, Behavior, and Immunity	No	6.633	Ayurveda
Ayurveda rasayana in prophylaxis of COVID-19	Patwardhan B., Chavan-Gautam P., Gautam M., Tillu G., Chopra A., Gairola S., Jadhav S.	AYUSH Centre of Excellence, Centre for Complementary and Integrative Health, Interdisciplinary School of Health Sciences, Savitribai Phule Pune University, Pune, 411 007, India; Serum Institute of India Ltd, Pune, 411 028, India; Arvind Chopra is in the Centre for Rheumatic Diseases, Pune, 411 001, India	India		English	Article	2020	Current Science	No	0.725	Ayurveda
Ayurveda's holistic lifestyle approach for the management of coronavirus disease (COVID-19): Possible role of Tulsi.	Goothy S.S.K. Goothy S. Choudhary A. Potey G.G. Chakraborty H. Kumar A.H.S. Mahadik V.K.	(Goothy, Choudhary, Chakraborty) Department of Physiology, R D Gardi Medical College, Ujjain, Madhya Pradesh, India (Goothy, Potey) Department of Biochemistry, R D Gardi Medical College, Ujjain, Madhya Pradesh, India (Kumar) Department of Stemcology, University College, Dublin, Belfield, Dublin-4, Ireland (Mahadik) R D Gardi Medical College, Ujjain, Madhya Pradesh, India	India, Ireland	http://dx.doi.org/10.26452/ijrps.v11iSPL1.1976	English	Article	2020	International Journal of Research in Pharmaceutical Sciences	No	N/A	Ayurveda
Becoming a Faithful Defender: Traditional Chinese Medicine against Coronavirus Disease 2019 (COVID-19).	Zhang L. Yu J. Zhou Y. Shen M. Sun L.	(Zhang, Zhou, Sun) Clinical Medical College of Zhejiang Chinese Medical University, Hangzhou, Zhejiang 310053, China (Yu) College of Basic Medical Science, Zhejiang Chinese Medical University, Hangzhou, ZHEJIANG 310053, China (Shen) Department of Medical Oncology, Hospital of Zhejiang Chinese Medical University, No. 54, Youdian Road, Shangcheng District, Hangzhou, Zhejiang 310006, China	China	http://dx.doi.org/10.1142/S0192415X2050038X	English	Article	2020	American Journal of Chinese Medicine	Yes	3.682	TCM
Biochemical effects and therapeutic application of Vitamin C (C6H8O6) on covid-19 infection	Earar K., Arbune M., Dorobat C.M., Rusu-Negraia M., Stefanescu V., Schipor O., Harabor V.R., Harabor A., Bratu A.M.	Dunarea de Jos University, Medicine and Pharmacy Faculty, 47 Domneasca Str., Galati, 800008, Romania; Infectious Diseases Hospital Sf. Parascheva Iasi, 2 Octav Botez Str., Iasi, 700116, Romania; Carol Davila University of Medecine and Pharmacy, Department of Radiology and Medical Imaging, Coltea Clinical Hospital, 1 Ion C. Bratianu Av., Bucharest, 030171, Romania	Romania	10.37358/RC.20.5.8159	English	Article	2020	Revista de Chimie	No	1.755	Vitamin C
Call to Action: Announcing the Traditional, Complementary and Integrative Health and Medicine COVID-19 Support Registry.	Weeks J.	(Weeks) SeattleWA 98116, United States	United States	http://dx.doi.org/10.1089/acm.2020.29083.jjw	English	Review	2020	Journal of Alternative & Complementary Medicine	Yes	2.109	TCM, General CAM
Can complementary and alternative medicines be beneficial in the treatment of COVID-19 through improving immune system function?.	Nilashi M. Samad S. Yusuf S.Y.M. Akbari E.	(Nilashi) Informetrics Research Group, Ton Duc Thang University, Ho Chi Minh City, Vietnam (Nilashi) Faculty of Information Technology, Ton Duc Thang University, Ho Chi Minh City, Vietnam (Samad) Department of Business Administration, College of Business and Administration, Princess Nourah bint Abdulrahman University, Riyadh, Saudi Arabia (Yusuf) Primary Care Medicine Discipline, Faculty of Medic…	Vietnam, Saudi Arabia, Malaysia	http://dx.doi.org/10.1016/j.jiph.2020.05.009	English	Letter	2020	Journal of Infection and Public Health	No	2.447	General CAM
Can early and high intravenous dose of vitamin C prevent and treat coronavirus disease 2019 (COVID-19)?.	Cheng R.Z.	(Cheng) Cheng Integrative Health Center, Columbia, SC 29212, United States	United States	http://dx.doi.org/10.1016/j.medidd.2020.100028	English	Editorial	2020	Medicine in Drug Discovery	No	N/A	Vitamin C
Can melatonin reduce the severity of COVID-19 pandemic?.	Shneider A. Kudriavtsev A. Vakhrusheva A.	(Shneider) CureLab Oncology, Inc, Dedham, MA, United States (Shneider) Department of Molecular Biology, Ariel University, Ariel, Israel (Kudriavtsev, Vakhrusheva) Biological Faculty, Lomonosov Moscow State University, Moscow, Russian Federation (Kudriavtsev) Emanuel Institute of Biochemical Phisics, RAS, Moscow, Russian Federation	United States, Israel, Russia	http://dx.doi.org/10.1080/08830185.2020.1756284	English	Note	2020	International Reviews of Immunology	No	4.58	Melatonin
Can probiotics and diet promote beneficial immune modulation and purine control in coronavirus infection?.	Morais A.H.A. Passos T.S. Maciel B.L.L. da Silva-Maia J.K.	(Morais, Maciel, da Silva-Maia) Center for Health Sciences, Federal University of Rio Grande do Norte, Natal, RN 59078-970, Brazil (Morais) Biosciences Center, Federal University of Rio Grande do Norte, Natal, RN 59078-970, Brazil (Morais, Passos, Maciel, da Silva-Maia) Department of Nutrition, Center for Health Sciences, Federal University of Rio Grande do Norte, Natal, RN 59078-970, Brazil	Brazil	http://dx.doi.org/10.3390/nu12061737	English	Review	2020	Nutrients	No	4.546	Probiotics
Cannabidiol as prophylaxis for SARS-CoV-2 and COVID-19? Unfounded claims versus potential risks of medications during the pandemic.	Brown J.D.	(Brown) Center for Drug Evaluation & Safety, Department of Pharmaceutical Outcomes & Policy, University of Florida College of Pharmacy, United States	United States	http://dx.doi.org/10.1016/j.sapharm.2020.03.020	English	Letter	2020	Research in social & administrative pharmacy : RSAP	No	2.844	Cannabidiol
Cannabinoid receptor type 2: A possible target in SARS-CoV-2 (CoV-19) infection?.	Rossi F. Tortora C. Argenziano M. Di Paola A. Punzo F.	(Rossi, Tortora, Punzo) Department of Woman, Child and General and Specialist Surgery, University of Campania "Luigi Vanvitelli", L. De Crecchio 4, Naples 80138, Italy (Argenziano, Di Paola) Department of Experimental Medicine, University of Campania "Luigi Vanvitelli", S. Maria di Costantinopoli 16, Naples 80138, Italy	Italy	http://dx.doi.org/10.3390/ijms21113809	English	Review	2020	International Journal of Molecular Sciences	No	4.556	Cannabis?
Cannabis in the Time of Coronavirus Disease 2019: The Yin and Yang of the Endocannabinoid System in Immunocompetence.	Sexton M.	(Sexton) Department of Anesthesiology, University of California, San Diego, San Diego, CA, USA	United States	http://dx.doi.org/10.1089/acm.2020.0144	English	Article	2020	Journal of Alternative & Complementary Medicine (New York, N.Y.)	Yes	2.109	Cannabis
Chinese herbal Huo-Gu formula for the treatment of steroid-associated osteonecrosis of femoral head: A 14-year follow-up of convalescent SARS patients.	Huang Z. Fu F. Ye H. Gao H. Tan B. Wang R. Lin N. Qin L. Chen W.	(Huang, Gao, Tan) Wangjing Hospital, China Academy of Chinese Medical Sciences, China (Fu, Ye) Guizhou University of Traditional Chinese Medicine, China (Wang, Chen) Orthopaedic Center, The Third Affiliated Hospital of Beijing University of Chinese Medicine, China (Lin) Institute of Chinese Materia Medica, China Academy of Chinese Medical Sciences, China (Qin) Department of Orthopaedics & Traumat…	China, Hong Kong	http://dx.doi.org/10.1016/j.jot.2020.03.014	English	Article	2020	Journal of Orthopaedic Translation	No	3.986	TCM
Chinese herbal medicine for SARS and SARS-CoV-2 treatment and prevention, encouraging using herbal medicine for COVID-19 outbreak	Shahrajabian M.H., Sun W., Shen H., Cheng Q.	Biotechnology Research Institute, Chinese Academy of Agricultural Sciences, Beijing, China; NMPA Key Laboratory for Testing and Risk Warning of Pharmaceutical Microbiology, Biological Inspection Department, Zhejiang Institute for Food and Drug Control, Hangzhou, China; College of Life Sciences, Hebei Agricultural University, Baoding, Hebei, 071000, China; Global Alliance of HeBAU-CLS&HeQiS for Bi…	China	10.1080/09064710.2020.1763448	English	Article	2020	Acta Agriculturae Scandinavica Section B: Soil and Plant Science	No	1.092	TCM
Chiropractic students call for action against unsubstantiated claims.	Plener J. Csiernik B. Bejarano G. Hjertstrand J. Goodall B.	(Plener, Csiernik) Canadian Memorial Chiropractic College, 6100 Leslie St., Toronto, ON M2H 3J1, Canada (Bejarano) Palmer College of Chiropractic, Florida Campus, 4777 City Center Pkwy, Port Orange, FL 32129, United States (Hjertstrand) University of South Wales, Treforest Campus, Llantwit Road, Pontypridd CF37 1DL, United Kingdom (Goodall) AECC University College, Parkwood Campus, Bournemouth, E…	Canada, United States, Wales, England	http://dx.doi.org/10.1186/s12998-020-00318-5	English	Review	2020	Chiropractic and Manual Therapies	Yes	1.512	Chiropractic
Clinical research protocol to evaluate the effectiveness and safety of individualized homeopathic medicine in the treatment and prevention of the COVID-19 epidemic.	Teixeira M.Z.	(Teixeira) Coordenador e Pesquisador da Disciplina Eletiva de Fundamentos da Homeopatia (MCM0773), Faculdade de Medicina da Universidade de Sao Paulo, Sao Paulo, Brazil (Teixeira) . Coordenador Cientifico do Departamento Cientifico de Homeopatia da Associacao Paulista de Medicina, Sao Paulo, Brazil	Brazil	http://dx.doi.org/10.1590/1806-9282.66.4.405	English	Article	2020	Revista da Associacao Medica Brasileira (1992)	No	0.915	General CAM
Combination of western medicine and Chinese traditional patent medicine in treating a family case of COVID-19.	Ni L. Zhou L. Zhou M. Zhao J. Wang D.W.	(Ni, Zhou, Wang) Division of Cardiology, Department of Internal Medicine and Hubei Key Laboratory of Genetics and Molecular Mechanisms of Cardiological Disorders, Tongji Hospital, Tongji Medical College, Huazhong University of Science and Technology, Wuhan 430030, China (Zhou, Zhao) Division of Respiration, Department of Internal Medicine and Hubei Key Laboratory of Genetics and Molecular Mechani…	China	http://dx.doi.org/10.1007/s11684-020-0757-x	English	Article	2020	Frontiers of medicine	No	3.421	TCM
Comment on Melatonin as a potential adjuvant treatment for COVID-19.	Herrera E.A. Gonzalez-Candia A.	(Herrera, Gonzalez-Candia) Laboratorio de Funcion y Reactividad Vascular, Programa de Fisiopatologia, ICBM, Facultad de Medicina, Universidad de Chile, Chile	Chile	http://dx.doi.org/10.1016/j.lfs.2020.117739	English	Note	2020	Life Sciences	No	3.647	Melatonin
Commentary: Myths and facts on vitamin D amidst the COVID-19 pandemic.	Chakhtoura M. Napoli N. El Hajj Fuleihan G.	(Chakhtoura, El Hajj Fuleihan) Calcium Metabolism and Osteoporosis Program, American University of Beirut Medical Center, Beirut, Lebanon (Chakhtoura, El Hajj Fuleihan) Scholars in HeAlth Research Program (SHARP), American University of Beirut Medical Center, Beirut, Lebanon (Napoli) Unit of Endocrinology and Diabetes, Department of Medicine, Universita Campus Bio-Medico di Roma, Via Alvaro di Po…	Lebanon, Italy, United States	http://dx.doi.org/10.1016/j.metabol.2020.154276	English	Article	2020	Metabolism: Clinical and Experimental	No	6.159	Vitamin D
Comprehensive comparison and analysis of the prevention and treatment of coronavirus disease 2019 and severe acute respiratory syndrome with traditional chinese medicine	Chen Y., Zhang J.-J., Liu Y., Shang H.-C.	Key Laboratory of Chinese Internal Medicine, Ministry of Education, Dongzhimen Hospital, Beijing University of Chinese Medicine, Beijing, 100700, China; First Clinical Medical College, Beijing University of Chinese Medicine, Beijing, China	China	10.4103/wjtcm.wjtcm_13_20	English	Review	2020	World Journal of Traditional Chinese Medicine	Yes	N/A	TCM
Computational investigation on Andrographis paniculata phytochemicals to evaluate their potency against SARS-CoV-2 in comparison to known antiviral compounds in drug trials.	Murugan N.A. Pandian C.J. Jeyakanthan J.	(Murugan) Department of Theoretical Chemistry and Biology, School of Engineering Sciences in Chemistry, Biotechnology and Health, KTH Royal Institute of Technology, Stockholm, Sweden (Pandian) Department of Biotechnology, Dr. Umayal Ramanathan College for Women, Karaikudi, India (Jeyakanthan) Department of Bioinformatics, Alagappa University, Tamilnadu, Karaikudi, India	Sweden, India	http://dx.doi.org/10.1080/07391102.2020.1777901	English	Article	2020	Journal of biomolecular structure & dynamics	No	N/A	Phytochemicals
Consideration of traditional Chinese medicine in treatment of highly pathogenic human coronaviruses SARS-CoV-2 and SARS-CoV. [Chinese]	Yang Y.-J. E X.-H. Ren H.-W. He Y. Zhou S.-P.	(Yang, E, Ren, He, Zhou) Tasly Academy, Tasly Pharmaceutical Group Co., Ltd., Tianjin 300410, China (Yang, E, Ren, He, Zhou) Key Laboratory of Critical Technology in Innovative Chinese Medicine, Tasly Pharmaceutical Group Co., Ltd., Tianjin 300410, China	China	http://dx.doi.org/10.7501/j.issn.0253-2670.2020.06.007	Chinese	Article	2020	Chinese Traditional and Herbal Drugs	Yes	N/A	TCM
Considerations for obesity, vitamin D, and physical activity amidst the COVID-19 pandemic.	Carter S.J. Baranauskas M.N. Fly A.D.	(Carter, Baranauskas) Department of Kinesiology, School of Public Health, Indiana University, Bloomington 47405, United States (Fly) Department of Applied Health Sciences, School of Public Health, Indiana University, Bloomington 47405, United States	United States	http://dx.doi.org/10.1002/oby.22838	English	Article	2020	Obesity	No	3.742	Vitamin D
Core Outcome Set for Clinical Trials of COVID-19 Based on Traditional Chinese and Western Medicine.	Qiu R. Zhao C. Liang T. Hao X. Huang Y. Zhang X. Chen Z. Wei X. Zhao M. Zhong C. Hu J. Li M. Han S. He T. Sun Y. Chen J. Shang H.	(Qiu, Huang, Zhang, Chen, Wei, Zhong, Hu, Han, He, Sun, Shang) Key Laboratory of Chinese Internal Medicine of Ministry of Education and Beijing, Dongzhimen Hospital, Beijing University of Chinese Medicine, Beijing, China (Zhao) Institute of Basic Research in Clinical Medicine, China Academy of Chinese Medical Sciences, Beijing, China (Liang) Emergency Department, Dongzhimen Hospital, Beijing Univ…	China	http://dx.doi.org/10.3389/fphar.2020.00781	English	Article	2020	Frontiers in Pharmacology	No	4.225	TCM
Correspondence COVID-19: Melatonin as a potential adjuvant treatment.	Salles C.	(Salles) Bahiana's School of Medicine and Public Health, Salvador, Brazil	Brazil	http://dx.doi.org/10.1016/j.lfs.2020.117716	English	Letter	2020	Life Sciences	No	3.647	Melatonin
Corrigendum to "Traditional Chinese medicine for COVID-19 treatment" [Pharmacol. Res. 155 (2020) 104743] (Pharmacological Research (2020) 155, (S1043661820307556), (10.1016/j.phrs.2020.104743)).	Ren J.-L. Zhang A.-H. Wang X.-J.	(Ren, Zhang, Wang) Engineering Research Center of Efficacy Evaluation and Industrial Development of TCM Classic Formulae of the Ministry of Education, National Chinmedomics Research Center, Sino-America Chinmedomics, Technology Collaboration Center, Heilongjiang University of Chinese Medicine, Heping Road 24, Harbin, China	China	http://dx.doi.org/10.1016/j.phrs.2020.104768	English	Erratum	2020	Pharmacological Research	No	5.893	TCM
Could melatonin be used in COVID-19 patients with laryngopharyngeal reflux disease?.	Kow C.S. Hasan S.S.	(Kow) School of Postgraduate Studies, International Medical University, Kuala Lumpur, Malaysia (Hasan) School of Applied Sciences, University of Huddersfield, Huddersfield, United Kingdom	Malaysia, England	http://dx.doi.org/10.1002/jmv.26150	English	Letter	2020	Journal of Medical Virology	No	2.021	Melatonin
COVID-19 (Sars-cov 2/Koronavirüs-19) tedavisinde klinikte kullanılan geleneksel Çin tıbbı bitkileri ve kardiyovasküler sisteme etkileri [Traditional Chinese medicine practices used in COVID-19 (Sars-cov 2/Coronavirus-19) treatment in clinic and their effects on the cardiovascular system]	Akalın E., Ekici M., Alan Z., Özbir Elevli E., Yaman Bucak A., Aobuliaikemu N., Üresin A.Y.	Department of Pharmaceutical Botany, Istanbul University Faculty of Pharmacyİstanbul, Turkey; Department of Medical Pharmacology, Istanbul University Faculty of Medicineİstanbul, Turkey; Department of Pharmacognosy, İstanbul University Faculty of Pharmacyİstanbul, Turkey	Turkey	10.5543/tkda.2020.03374	English	Review	2020	Turk Kardiyoloji Dernegi Arsivi : Turk Kardiyoloji Derneginin yayin organidir	No	N/A	TCM
COVID-19 and cardiovascular injury: A role for oxidative stress and antioxidant treatment?	Loffredo L., Violi F.	Department of Clinical, Internal Medicine, Anesthesiology and Cardiovascular Sciences, Sapienza University of Rome, Italy	Italy	10.1016/j.ijcard.2020.04.066	English	Letter	2020	International Journal of Cardiology	No	3.229	Antioxidants
COVID-19 and vitamin D-Is there a link and an opportunity for intervention?.	Jakovac H.	(Jakovac) Department of Physiology and Immunology, Medical Faculty, University of Rijeka, Rijeka, Croatia	Croatia	http://dx.doi.org/10.1152/ajpendo.00138.2020	English	Letter	2020	American Journal of Physiology - Endocrinology and Metabolism	No	3.469	Vitamin D
COVID-19 Fatalities, Latitude, Sunlight, and Vitamin D.	Whittemore PB	Whittemore, Paul B. Pepperdine University. Electronic address: paulwhittemore@earthlink.net.	United States	https://dx.doi.org/10.1016/j.ajic.2020.06.193	English	Journal Article	2020	American Journal of Infection Control	No	2.294	Vitamin D
COVID-19 pandemic: A pragmatic plan for ayurveda intervention.	Rastogi S. Pandey D.N. Singh R.H.	(Rastogi) Dept of Kaya Chikitsa, State Ayurvedic College and Hospital, Lucknow 226003, India (Pandey) Department of Environment/Forests, Government of Rajasthan, Secretariat, Jaipur, Rajasthan 302005, India (Singh) Faculty of Ayurveda, Institute of Medical Sciences, Banaras Hindu University, Varanasi 221005, India	India	http://dx.doi.org/10.1016/j.jaim.2020.04.002	English	Article	2020	Journal of Ayurveda and Integrative Medicine	Yes	N/A	Ayurveda
Covid-19, cocooning and vitamin d intake requirements.	McKenna M.J. Flynn M.A.T.	(McKenna, Flynn) UCD School of Medicine, University College Dublin, Dublin, United Kingdom	Ireland		English	Article	2020	Irish Medical Journal	No	N/A	Vitamin D
COVID-19: Melatonin as a potential adjuvant treatment.	Zhang R. Wang X. Ni L. Di X. Ma B. Niu S. Liu C. Reiter R.J.	(Zhang, Wang, Ni, Di, Ma, Niu, Liu) Department of Vascular Surgery, Peking Union Medical College Hospital, Chinese Academy of Medical Sciences and Peking Union Medical College, Beijing, China (Reiter) Department of Cell Systems and Anatomy, UT Health San Antonio, San Antonio, TX 78229, United States	China, United States	http://dx.doi.org/10.1016/j.lfs.2020.117583	English	Review	2020	Life Sciences	No	3.647	Melatonin
Covid-19: Public health agencies review whether vitamin D supplements could reduce risk.	Torjesen I.	(Torjesen) LondonUnited Kingdom	England	http://dx.doi.org/10.1136/bmj.m2475	English	Article	2020	BMJ (Clinical research ed.)	No	N/A	Vitamin D
Current State of Research About Chinese Herbal Medicines (CHM) for the Treatment of Coronavirus Disease 2019 (COVID-19): A Scoping Review.	Lopez-Alcalde J Yan Y Witt CM Barth J	Lopez-Alcalde, Jesus. Institute for Complementary and Integrative Medicine, University Hospital Zurich and University Zurich, Zurich, Switzerland. Lopez-Alcalde, Jesus. Faculty of Health Sciences, Universidad Francisco de Vitoria (UFV), Madrid, Spain. Lopez-Alcalde, Jesus. Instituto Ramon y Cajal de Investigacion Sanitaria (IRYCIS), Unidad de bioestadistica clinica, Hospital Universitario Ramon y…	Switzerland, Spain, Germany, United States	https://dx.doi.org/10.1089/acm.2020.0189	English	Journal Article	2020	Journal of Alternative & Complementary Medicine	Yes	2.109	TCM
Databases for facilitating mechanistic investigations of traditional Chinese medicines against COVID-19.	Jiang S. Cui Q. Ni B. Chen Y. Tan Y. Chen W. Chen Y.Z.	(Jiang, Cui, Ni, Chen) School of Science, School of Pharmacy, China Pharmaceutical University, Nanjing 210009, China (Tan) The State Key Laboratory of Chemical Oncogenomics, Key Laboratory of Chemical Biology, the Graduate School at Shenzhen, Tsinghua University, Shenzhen Technology and Engineering Laboratory for Personalized Cancer Diagnostics and Therapeutics, Shenzhen Kivita Innovative Drug Di…	China, Singapore	http://dx.doi.org/10.1016/j.phrs.2020.104989	English	Letter	2020	Pharmacological Research	No	5.893	TCM
Delirium and sleep disturbances in COVID-19: a possible role for melatonin in hospitalized patients?.	Zambrelli E. Canevini M. Gambini O. D'Agostino A.	(Zambrelli, Canevini) Epilepsy Center - Sleep Medicine Center, Childhood and Adolescence Neuropsychiatry Unit, ASST Santi Paolo e Carlo, San Paolo Hospital, Milan, Italy (Canevini, Gambini, D'Agostino) Department of Health Sciences, Universita Degli Studi di Milano, Italy (Gambini, D'Agostino) Department of Mental Health, ASST Santi Paolo e Carlo, Milan, Italy (Gambini) "Aldo Ravelli" Research Ce…	Italy	http://dx.doi.org/10.1016/j.sleep.2020.04.006	English	Letter	2020	Sleep Medicine	No	3.038	Melatonin
Delirium, sleep, COVID-19 and melatonin.	Wiwanitkit V.	(Wiwanitkit) Dr DY Patil University, Pune, India	India	http://dx.doi.org/10.1016/j.sleep.2020.05.028	English	Letter	2020	Sleep Medicine	No	3.038	Melatonin
Diagnosis and treatment of novel coronavirus pneumonia based on the theory of traditional Chinese medicine.	Wang S.-X. Wang Y. Lu Y.-B. Li J.-Y. Song Y.-J. Nyamgerelt M. Wang X.-X.	(Wang, Wang, Li, Song, Nyamgerelt, Wang) School of Basic Medical Sciences, Lanzhou University, Lanzhou, Gansu Province 730000, China (Lu) The Second Clinical Medical College, Lanzhou University, Lanzhou, Gansu Province 730000, China (Li, Wang) Key Laboratory of Evidence-Based Medicine and Knowledge Translation of Gansu Province, Lanzhou, Gansu Province 730000, China	China	http://dx.doi.org/10.1016/j.joim.2020.04.001	English	Review	2020	Journal of Integrative Medicine	Yes	2.446	TCM
Diagnosis and Treatment Protocol for COVID-19 (Trial Version 7) Traditional Chinese medicine (TCM) treatment	[No author name available]			10.4103/2311-8571.281609	English	Article	2020	World Journal of Traditional Chinese Medicine	Yes	N/A	TCM
Diagnosis and treatment protocol for COVID-19 with traditional Chinese medicine.				http://dx.doi.org/10.1016/j.acu.2020.04.002	English, Spanish	Article	2020	Revista Internacional de Acupuntura	Yes	0.17	TCM
Diet supplementation, probiotics, and nutraceuticals in SARS-CoV-2 infection: A scoping review.	Infusino F. Marazzato M. Mancone M. Fedele F. Mastroianni C.M. Severino P. Ceccarelli G. Santinelli L. Cavarretta E. Marullo A.G.M. Miraldi F. Carnevale R. Nocella C. Biondi-Zoccai G. Pagnini C. Schiavon S. Pugliese F. Frati G. D'Ettorre G.	(Infusino, Mancone, Fedele, Severino, Miraldi, Nocella) Department of Clinical Internal, Anesthesiologic and Cardiovascular Sciences, Sapienza University of Rome, Rome 00185, Italy (Marazzato, Mastroianni, Ceccarelli, Santinelli, D'Ettorre) Department of Public Health and Infectious Diseases, Sapienza, University of Rome, Rome 00185, Italy (Cavarretta, Marullo, Carnevale, Biondi-Zoccai, Schiavon,…	Italy	http://dx.doi.org/10.3390/nu12061718	English	Review	2020	Nutrients	No	4.546	Dietary Supplements, Probiotics, Nutraceuticals
Dietary therapy and herbal medicine for COVID-19 prevention: A review and perspective	Panyod S., Ho C.-T., Sheen L.-Y.	Institute of Food Science and Technology, National Taiwan University, Taipei, Taiwan; Department of Food Science, Rutgers University, New BrunswickNJ, United States; Center for Food and Biomolecules, National Taiwan University, Taipei, Taiwan; National Center for Food Safety Education and Research, National Taiwan University, Taipei, Taiwan	Taiwan, United States	10.1016/j.jtcme.2020.05.004	English	Review	2020	Journal of Traditional and Complementary Medicine	Yes	N/A	Herbal Medicine
Discovery of intervention effect of Chinese herbal formulas on COVID-19 pulmonary fibrosis treated by VEGFR and FGFR inhibitors. [Chinese]	Bian Y.-Q. Ma J. Ren Y. Zhang Y.-L. Qiao Y.-J.	(Bian, Ma, Ren, Zhang, Qiao) Key Technology of Traditional Chinese Medicine Pharmacy and New Drug Development Engineering Research Center of Ministry of Education, School of Chinese Materia Medica, Beijing University of Chinese Medicine, Beijing 102488, China	China	http://dx.doi.org/10.19540/j.cnki.cjcmm.20200315.401	Chinese	Article	2020	Zhongguo Zhongyao Zazhi	Yes	N/A	TCM
Does vitamin D deficiency increase the severity of COVID-19?.	Weir E.K. Thenappan T. Bhargava M. Chen Y.	(Weir) Cardiovascular Division, University of Minnesota, Minneapolis, United States (Thenappan) Cardiovascular Division, University of Minnesota, Minneapolis, USA; weirx002@umn.edu (Bhargava) Division of Pulmonary, Allergy, Critical Care and Sleep, University of Minnesota, Minneapolis, United States (Chen) Department of Physiology and Biophysics, University of Mississippi Medical Center, Jackson,…	United States	http://dx.doi.org/10.7861/clinmed.2020-0301	English	Article	2020	Clinical Medicine (London, England)	No	1.883	Vitamin D
Does Vitamin D play a role in the management of Covid-19 in Brazil?.	Ribeiro H. Santana K.V.S. Oliver S.L. Rondo P.H.C. Mendes M.M. Charlton K. Lanham-New S.	(Ribeiro) Departamento de Saude Ambiental, Faculdade de Saude Publica, Universidade de Sao Paulo, Sao Paulo, Brazil (Santana, Oliver) Programa de Pos-Graduacao em Saude Global e Sustentabilidade, Faculdade de Saude Publica, Universidade de Sao Paulo, Sao Paulo, Brazil (Rondo) Departamento de Nutricao, Faculdade de Saude Publica, Universidade de Sao Paulo, Sao Paulo, Brazil (Mendes, Lanham-New) Fa…	Brazil, England, Australia	http://dx.doi.org/10.11606/s1518-8787.2020054002545	English	Article	2020	Revista de Saude Publica		1.748	Vitamin D
Does vitamin D status impact mortality from SARS-CoV-2 infection?.	Marik P.E. Kory P. Varon J.	(Marik) Division of Pulmonary and Critical Care Medicine, Eastern Virginia Medical School, Norfolk, VA 23501, United States (Kory) Trauma and Life Support Center, Critical, Care Service, University of Wisconsin School of Medicine and Public Health, Madison, WI 53705, United States (Varon) Department of Critical Care Medicine, United Memorial Medical Center, Houston, TX 77076, United States	United States	http://dx.doi.org/10.1016/j.medidd.2020.100041	English	Editorial	2020	Medicine in Drug Discovery	No	N/A	Vitamin D
Editorial: low population mortality from COVID-19 in countries south of latitude 35 degrees North supports vitamin D as a factor determining severity.	Rhodes J.M. Subramanian S. Laird E. Kenny R.A.	(Rhodes, Subramanian) Department of Cellular and Molecular Physiology, Institute of Translational Medicine, University of Liverpool, Liverpool, United Kingdom (Laird) The Irish Longitudinal Study on Ageing, School of Medicine, Trinity College Dublin, Dublin, Ireland (Kenny) Department of Medical Gerontology, Mercers Institute for Ageing, St James Hospital, Dublin 8, Ireland	England, Ireland	http://dx.doi.org/10.1111/apt.15777	English	Editorial	2020	Alimentary Pharmacology and Therapeutics	No	7.515	Vitamin D
Editorial: low population mortality from COVID-19 in countries south of latitude 35 degrees North-supports vitamin D as a factor determining severity. Authors' reply.	Garg M. Al-Ani A. Mitchell H. Hendy P. Christensen B.	(Garg) Department of Gastroenterology, Northern Hospital, Melbourne, Vic., Australia (Garg, Al-Ani, Christensen) Department of Gastroenterology, Royal Melbourne Hospital, Melbourne, Vic., Australia (Garg) Department of Medicine, University of Melbourne, Melbourne, VIC, Australia (Garg, Mitchell) Eastern Health Clinical School, Monash University, Melbourne, VIC, Australia (Hendy) Department of Gas…	Australia, England	http://dx.doi.org/10.1111/apt.15796	English	Editorial	2020	Alimentary Pharmacology and Therapeutics	No	7.515	Vitamin D
Effectiveness of Integrative Medicine in COVID-19?.	Litscher G.	(Litscher) Research Unit for Complementary and Integrative Laser Medicine, Research Unit of Biomedical Engineering in Anesthesia and Intensive Care Medicine, TCM Research Center Graz, Medical University of Graz, Graz, Austria	Austria	http://dx.doi.org/10.1089/acu.2020.29143.lch	English	Editorial	2020	Medical Acupuncture	Yes	N/A	General CAM
Efficacy and safety of acupuncture therapy for COVID-19: A protocol for systematic review and meta-analysis.	Huang S. Wang S. Wang M. Rong J. Yu W. Li J. Han J. Yang D.	(Huang, Wang, Rong, Han, Yang) Shandong University of Traditional Chinese Medicine (Wang) People's Hospital of Lixia District, Jinan, China (Yu, Li) Weifang Hospital of Traditional Chinese Medicine, Weifang, China (Han, Yang) Affiliated Hospital of Shandong University of Traditional Chinese Medicine, Jinan, Shandong, China	China	http://dx.doi.org/10.1097/MD.0000000000020407	English	Article	2020	Medicine	No	1.552	Acupuncture
Efficacy and safety of Chinese herbal medicine for Coronavirus disease 2019: A protocol for systematic review and meta-analysis.	Yang M. Hu Z. Yue R.	(Yang) Hospital of Chengdu University of Traditional Chinese Medicine, Sichuan Province, Chengdu, China	China	http://dx.doi.org/10.1097/MD.0000000000020157	English	Article	2020	Medicine	No	1.552	TCM
Efficacy and safety of Chinese patent medicine injection for COVID-19: A protocol for systematic review and meta-analysis.	Lu M. Lu Z. Zhang T. Wang W. Xue Y. Cao Z.	(Lu) First Clinical College, Shandong University of Traditional Chinese Medicine (Lu, Zhang) Department of Pharmacy, Shandong Rehabilitation Hospital (Wang, Cao) Affiliated Hospital of Shandong University of Traditional Chinese Medicine (Xue) Department of Internal Medicine of Traditional Chinese Medicine, Shandong University of Traditional Chinese Medicine, Shandong Province, Jinan, China	China	http://dx.doi.org/10.1097/MD.0000000000020706	English	Article	2020	Medicine	No	1.552	TCM
Efficacy and Safety of Integrated Traditional Chinese and Western Medicine for Corona Virus Disease 2019 (COVID-19): a systematic review and meta-analysis.	Liu M. Gao Y. Yuan Y. Yang K. Shi S. Zhang J. Tian J.	(Liu, Gao, Shi, Tian) Evidence Based Medicine Center, School of Basic Medical Sciences, Lanzhou University, Lanzhou, Gansu 730000, China (Yuan) Wuwei Traditional Chinese Medicine Hospital, Wuwei, Gansu 733000, China (Yang) School of Nursing, Lanzhou University, Lanzhou, Gansu 730000, China (Zhang) Evidence-Based Medicine Center, Tianjin University of Traditional Chinese Medicine, Tianjin, Tianjin…	China	http://dx.doi.org/10.1016/j.phrs.2020.104896	English	Review	2020	Pharmacological Research	No	5.893	TCM
Efficacy and safety of Lianhuaqingwen capsules, a repurposed Chinese herb, in patients with coronavirus disease 2019: A multicenter, prospective, randomized controlled trial.	Hu K. Guan W.-J. Bi Y. Zhang W. Li L. Zhang B. Liu Q. Song Y. Li X. Duan Z. Zheng Q. Yang Z. Liang J. Han M. Ruan L. Wu C. Zhang Y. Jia Z.-H. Zhong N.-S.	(Jia) Hebei Yiling Hospital, National Key Laboratory of Collateral Disease Research and Innovative Chinese Medicine, Shijiazhuang, Hebei province 050035, China (Guan, Yang, Liang, Zhong) State Key Laboratory of Respiratory Disease, National Clinical Research Center for Respiratory Disease, Guangzhou Institute of Respiratory Health, the First Affiliated Hospital of Guangzhou Medical University, Gu…	China	http://dx.doi.org/10.1016/j.phymed.2020.153242	English	Article	2020	Phytomedicine	Yes	4.268	TCM
Ethical review of clinical study on intervention with traditional Chinese medicine in new public health emergencies. [Chinese]	Gu H. Wang Z.-F. Xie Y.-M.	(Gu, Wang, Xie) Institute of Basic Research in Clinical Medicine, China Academy of Chinese Medical Sciences, Beijing 100700, China	China	http://dx.doi.org/10.19540/j.cnki.cjcmm.20200318.502	Chinese	Article	2020	Zhongguo Zhongyao Zazhi	Yes	N/A	TCM
Evaluation of green tea polyphenols as novel corona virus (SARS CoV-2) main protease (Mpro) inhibitors - an in silico docking and molecular dynamics simulation study.	Ghosh R. Chakraborty A. Biswas A. Chowdhuri S.	(Ghosh, Chakraborty, Biswas, Chowdhuri) School of Basic Sciences, Indian Institute of Technology Bhubaneswar, Bhubaneswar, India	India	http://dx.doi.org/10.1080/07391102.2020.1779818	English	Article	2020	Journal of biomolecular structure & dynamics	No	N/A	Tea
Evaluation of the Adjuvant Efficacy of Natural Herbal Medicine on COVID-19: A Retrospective Matched Case-Control Study.	Zhang H.-T. Huang M.-X. Liu X. Zheng X.-C. Li X.-H. Chen G.-Q. Xia J.-Y. Hong Z.-S.	(Zhang, Huang, Liu, Zheng, Li, Chen, Xia, Hong) Department of Infectious Disease, Fifth Affiliated Hospital of Sun Yat-sen University, Zhuhai, GUANGDONG, China	China	http://dx.doi.org/10.1142/S0192415X20500391	English	Article	2020	American Journal of Chinese Medicine	Yes	3.682	Herbal Medicine
Evidence that vitamin d supplementation could reduce risk of influenza and covid-19 infections and deaths.	Grant W.B. Lahore H. McDonnell S.L. Baggerly C.A. French C.B. Aliano J.L. Bhattoa H.P.	(Grant) Sunlight, Nutrition, and Health Research Center, P.O. Box 641603, San Francisco, CA 94164-1603, United States (Lahore) 2289 Highland Loop, Port Townsend, WA 98368, United States (McDonnell, Baggerly, French, Aliano) GrassrootsHealth, Encinitas, CA 92024, United States (Bhattoa) Department of Laboratory Medicine, Faculty of Medicine, University of Debrecen, Nagyerdei Blvd 98, Debrecen H-40…	United States, Hungary	http://dx.doi.org/10.3390/nu12040988	English	Review	2020	Nutrients	No	4.546	Vitamin D
Exploration on scientific connotation of TCM syndromes and recommended prescriptions against COVID-19 based on TCMTP V2.0. [Chinese]	Xu H.-Y. Zhang Y.-Q. Qing Y.-W. Zhao H.-Y. Wang P. Liu F.	(Xu, Zhang, Zhao, Wang) Institute of Chinese Materia Medica, China Academy of Chinese Medical Sciences, Beijing 100700, China (Xu, Liu) Shaanxi Institute of International Trade & Commerce, Xi'an 712046, China (Qing) Tianjin University of Traditional Chinese Medicine, Tianjin 301617, China	China	http://dx.doi.org/10.19540/j.cnki.cjcmm.20200229.401	Chinese	Article	2020	Zhongguo Zhongyao Zazhi	Yes	N/A	TCM
Exploring material basis and mechanism of Lianhua Qingwen Prescription against coronavirus based on network pharmacology. [Chinese]	Ling X.-Y. Tao J.-L. Sun X. Yuan B.	(Ling, Tao, Sun, Yuan) Affiliated Hospital of Nanjing University of Chinese Medicine, Nanjing 210029, China	China	http://dx.doi.org/10.7501/j.issn.0253-2670.2020.07.006	Chinese	Article	2020	Chinese Traditional and Herbal Drugs	Yes	N/A	TCM
Exploring the Active Compounds of Traditional Mongolian Medicine in Intervention of Novel Coronavirus (COVID-19) Based on Molecular Docking Method.	Yu JW Wang L Bao LD	Yu, Jiu-Wang. Department of Pharmacy, Affiliated Hospital of Inner Mongolia Medical University, Hohhot, Inner Mongolia, 010059, P. R. China. Wang, Lu. Department of Pharmacy, Affiliated Hospital of Inner Mongolia Medical University, Hohhot, Inner Mongolia, 010059, P. R. China. Bao, Li-Dao. Department of Pharmacy, Affiliated Hospital of Inner Mongolia Medical University, Hohhot, Inner Mongolia, 01…	China	https://dx.doi.org/10.1016/j.jff.2020.104016	English	Journal Article	2020	Journal of Functional Foods	No	3.701	Traditional Mongolian Medicine
Feasibility analysis on acupuncture therapy for the treatment of Corona Virus Disease 2019 and the exploration on the application scheme. [Chinese]	Wang R.-Q. Liu J.-X. Zhang Z. Wen J. Han P. Wu H.-H. Jia Y.-J. Jia C.-S. Pan L.-J.	(Wang, Liu, Zhang, Wen, Han, Wu, Jia, Jia, Pan) Institute of Acupuncture Moxibustion and Massage of Hebei University of Chinese Medicine, Shijiazhuang 050200, China	China	http://dx.doi.org/10.13702/j.1000-0607.200275	Chinese	Article	2020	Zhen ci yan jiu = Acupuncture research	Yes	N/A	Acupuncture
Glycyrrhetinic acid and its derivatives as potential alternative medicine to relieve symptoms in nonhospitalized COVID-19 patients.	Ding H. Deng W. Ding L. Ye X. Yin S. Huang W.	(Ding) Key Laboratory of Combinatorial Biosynthesis and Drug Discovery, Ministry of Education, Wuhan University School of Pharmaceutical Sciences, Wuhan University, Wuhan, China (Deng) Department of Neurology, Massachusetts General Hospital, Boston, MA, United States (Ding) Department of anatomy, School of Basic Medical Sciences, Wuhan University, Wuhan, China (Ye) Department of Respiratory Disea…	China, United States	http://dx.doi.org/10.1002/jmv.26064	English	Article	2020	Journal of Medical Virology	No	2.021	Glycyrrhetinic Acid
Greater risk of severe COVID-19 in Black, Asian and Minority Ethnic populations is not explained by cardiometabolic, socioeconomic or behavioural factors, or by 25(OH)-vitamin D status: study of 1326 cases from the UK Biobank.	Raisi-Estabragh Z. McCracken C. Bethell M.S. Cooper J. Cooper C. Caulfield M.J. Munroe P.B. Harvey N.C. Petersen S.E.	(Raisi-Estabragh, McCracken, Cooper, Caulfield, Munroe, Petersen) William Harvey Research Institute, NIHR Barts Biomedical Research Centre, Queen Mary University of London, London, United Kingdom (Raisi-Estabragh, Petersen) Barts Heart Centre, Barts Health NHS Trust, St Bartholomew's Hospital, London, United Kingdom (Bethell) Hinchingbrooke Hospital, North West Anglia NHS Foundation Trust, Huntin…	England	http://dx.doi.org/10.1093/pubmed/fdaa095	English	Article	2020	Journal of Public Health (Oxford, England)	No	1.806	Vitamin D
Guideline-Based Chinese Herbal Medicine Treatment Plus Standard Care for Severe Coronavirus Disease 2019 (G-CHAMPS): Evidence From China.	Ye Y.-A.	Dongzhimen Hospital, Beijing University of Chinese Medicine, Beijing, China	China	http://dx.doi.org/10.3389/fmed.2020.00256	English	Article	2020	Frontiers in Medicine	No	3.9	TCM
Guidelines on acupuncture and moxibustion intervention for COVID-19 (second edition).		Asociacion China de Acupuntura-Moxibustion, Beijin, China	China	http://dx.doi.org/10.1016/j.acu.2020.04.001	English, Spanish	Article	2020	Revista Internacional de Acupuntura	Yes	0.17	Acupuncture, Moxibustion
Herbal drugs having antiviral potency can be used in treatment of corona virus disease.	Chaddha V.	(Chaddha) Diploma Pharmacy Department, Laxman Seth Pharmacy College, Shivpuri, Madhya Pradesh, India	India		English	Article	2020	International Journal of Pharmaceutical Sciences Review and Research	No	N/A	Herbal Medicine
Herbal medicine and pattern identification for treating COVID-19: a rapid review of guidelines.	Ang L. Lee H.W. Choi J.Y. Zhang J. Soo Lee M.	(Ang, Soo Lee) Clinical Medicine Division, Korea Institute of Oriental Medicine, Daejeon, South Korea (Ang, Soo Lee) Korean Convergence Medicine, University of Science and Technology, Daejeon, South Korea (Lee) Herbal Medicine Research Division, Korea Institute of Oriental Medicine, Daejeon, South Korea (Choi) School of Korean Medicine & Korean Medicine Hospital Lung Cancer & Pulmonology, Pusan N…	South Korea, China	http://dx.doi.org/10.1016/j.imr.2020.100407	English	Review	2020	Integrative Medicine Research	Yes	2.172	Herbal Medicine
Herbal medicine for the treatment of coronavirus disease 2019 (COVID-19): A systematic review and meta-analysis of randomized controlled trials.	Ang L. Song E. Lee H.W. Lee M.S.	(Ang, Lee) Clinical Medicine Division, Korea Institute of Oriental Medicine, Daejeon 34054, South Korea (Ang, Lee) Korean Convergence Medicine, University of Science and Technology, Daejeon 34113, South Korea (Song) Global Strategy Division, Korea Institute of Oriental Medicine, Daejeon 34054, South Korea (Song) Department of Preventive Medicine, College of Korean Medicine, Daejeon University, Da…	South Korea	http://dx.doi.org/10.3390/jcm9051583	English	Review	2020	Journal of Clinical Medicine	No	3.303	Herbal Medicine
Herbal medicine for treatment of children diagnosed with COVID-19: A review of guidelines.	Ang L. Lee H.W. Kim A. Lee J.A. Zhang J. Lee M.S.	(Ang) Clinical Medicine Division, Korea Institute of Oriental Medicine, Daejeon, South Korea; Korean Convergence Medicine, University of Science and Technology, Daejeon, South Korea (Lee) Herbal Medicine Research Division, Korea Institute of Oriental Medicine, Daejeon, South Korea (Kim) Future Medicine Division, Korea Institute of Oriental Medicine, Daejeon, South Korea (Lee) Hwa-pyeong Institute…	South Korea, China	http://dx.doi.org/10.1016/j.ctcp.2020.101174	English	Review	2020	Complementary therapies in clinical practice	Yes	1.77	Herbal Medicine
Herbs that might be effective for the management of COVID-19: A bioinformatics analysis on anti-tyrosine kinase property.	Sriwijitalai W. Wiwanitkit V.	(Sriwijitalai) Private Academic Writer/Consultant, Bangkok, Thailand (Wiwanitkit) Department of Community Medicine, Dr. DY Patil University, Pune, Maharashtra, India (Wiwanitkit) Department of Tropical Medicine, Hainan Medical University, Haikou, China (Wiwanitkit) Department of Biological Science, Joseph Ayobabalola University, Ikeji-Arakeji, Nigeria	Thailand, India, China, Nigeria	http://dx.doi.org/10.4103/jrms.JRMS_312_20	English	Letter	2020	Journal of Research in Medical Sciences	No	1.746	Herbal Medicine
High throughput virtual screening reveals SARS-CoV-2 multi-target binding natural compounds to lead instant therapy for COVID-19 treatment.	Naik B. Gupta N. Ojha R. Singh S. Prajapati V.K. Prusty D.	(Naik, Gupta, Ojha, Singh, Prajapati, Prusty) Department of Biochemistry, School of Life Sciences, Central University of Rajasthan, NH-8, Bandarsindri, Kishangarh, Ajmer, Rajasthan 305817, India	India	http://dx.doi.org/10.1016/j.ijbiomac.2020.05.184	English	Article	2020	International Journal of Biological Macromolecules	No	5.162	Natural Products
Highlights of traditional Chinese medicine frontline expert advice in the China national guideline for COVID-19.	Ho L.T.F. Chan K.K.H. Chung V.C.H. Leung T.H.	(Ho, Chung, Leung) School of Chinese Medicine, Faculty of Medicine, The Chinese University of Hong Kong, Hong Kong (Chan) United Christian Nethersole Community Health Service - The Chinese University of Hong Kong Chinese Medicine Clinic cum Training and Research Centre (Tai Po District), Hong Kong (Chung) Jockey Club School of Public Health and Primary Care, Faculty of Medicine, The Chinese Unive…	Hong Kong	http://dx.doi.org/10.1016/j.eujim.2020.101116	English	Article	2020	European Journal of Integrative Medicine	Yes	0.974	TCM
Hispidin and Lepidine E: two Natural Compounds and Folic acid as Potential Inhibitors of 2019-novel coronavirus Main Protease (2019-nCoVMpro), molecular docking and SAR study.	Serseg T. Benarous K. Yousfi M.	(Serseg, Benarous, Yousfi) Fundamental sciences laboratory, Amar Telidji University	Algeria	http://dx.doi.org/10.2174/1573409916666200422075440	English	Article	2020	Current computer-aided drug design	No	0.935	Hispidin, Lepidine E, Folic Acid
Homeopathic Clinical Features of 18 Patients in COVID-19 Outbreaks in Hong Kong.	To K.L.A. Fok Y.Y.Y.	(To, Fok) Hong Kong	Hong Kong	http://dx.doi.org/10.1055/s-0040-1710545	English	Article	2020	Homeopathy : the journal of the Faculty of Homeopathy	Yes	1.704	Homeopathy
Homeopathy combat against coronavirus disease (Covid-19).	Kalliantas D. Kallianta M. Karagianni C.S.	(Kalliantas, Karagianni) Department of Materials Science and Engineering, School of Chemical Engineering, NTUA, GR15780, Athens, Greece (Kalliantas) National Technical University of Athens, 9 Heroon Polytechniou Str. Zografos Campus, Athens 15780, Greece (Kallianta) School of Dentistry, National and Kapodistrian University of Athens, Athens, Greece	Greece	http://dx.doi.org/10.1007/s10389-020-01305-z	English	Article	2020	Journal of Public Health (Germany)	No	1.806	Homeopathy
Identification of bioactive molecules from tea plant as SARS-CoV-2 main protease inhibitors.	Bhardwaj V.K. Singh R. Sharma J. Rajendran V. Purohit R. Kumar S.	(Bhardwaj, Singh, Sharma, Purohit) Structural Bioinformatics Lab, CSIR-Institute of Himalayan Bioresource Technology (CSIR-IHBT), Palampur, HP, India (Bhardwaj, Singh, Sharma, Rajendran, Purohit, Kumar) Biotechnology division, CSIR-IHBT, Palampur, HP, India (Bhardwaj, Purohit) Academy of Scientific & Innovative Research (AcSIR), CSIR-IHBT Campus, Palampur, HP, India	India	http://dx.doi.org/10.1080/07391102.2020.1766572	English	Article	2020	Journal of Biomolecular Structure and Dynamics	No	N/A	Tea
Identification of phytochemical inhibitors against main protease of COVID-19 using molecular modeling approaches.	Kumar A. Choudhir G. Shukla S.K. Sharma M. Tyagi P. Bhushan A. Rathore M.	(Kumar) Bioinformatics Laboratory, Uttarakhand Council for Biotechnology (UCB), Biotech Bhawan, Pantnagar ,U.S. Nagar, Uttarakhand 263145, India (Kumar) Advanced Centre for Computational and Applied Biotechnology, Uttarakhand Council for Biotechnology (UCB), Dehradun 248007, India (Choudhir) Department of Botany, CCS University, Meerut, India (Shukla) Multidisciplinary Research Unit (MRU), Govern…	India	http://dx.doi.org/10.1080/07391102.2020.1772112	English	Article	2020	Journal of biomolecular structure & dynamics	No	N/A	Phytochemicals
Identifying potential treatments of COVID-19 from Traditional Chinese Medicine (TCM) by using a data-driven approach.	Ren X. Shao X.-X. Li X.-X. Jia X.-H. Song T. Zhou W.-Y. Wang P. Li Y. Wang X.-L. Cui Q.-H. Qiu P.-J. Zhao Y.-G. Li X.-B. Zhang F.-C. Li Z.-Y. Zhong Y. Wang Z.-G. Fu X.-J.	(Ren, Shao, Li, Li, Wang, Cui, Zhao, Li, Zhang, Li, Wang, Fu) Shandong University of Traditional Chinese Medicine, Jinan 250355, China (Ren, Shao, Li, Fu) Marine Traditional Chinese Medicine Research Center, Qingdao Academy of Traditional Chinese Medicine, Shandong University of Traditional Chinese Medicine, Qingdao 266114, China (Shao, Wang, Fu) Shandong Engineering and Technology Research Cente…	China	http://dx.doi.org/10.1016/j.jep.2020.112932	English	Article	2020	Journal of Ethnopharmacology	No	3.69	TCM
In silico and in vitro analysis of small molecules and natural compounds targeting the 3CL protease of feline infectious peritonitis virus.	Theerawatanasirikul S. Kuo C.J. Phetcharat N. Lekcharoensuk P.	(Theerawatanasirikul) Department of Anatomy, Faculty of Veterinary Medicine, Kasetsart University, Bangkok 10900, Thailand (Kuo) Department of Veterinary Medicine, National Chung Hsing University, Taichung 40227, Taiwan (Republic of China) (Phetcharat, Lekcharoensuk) Department of Microbiology and Immunology, Faculty of Veterinary Medicine, Kasetsart University, 50th Ngamwongwan Rd., Ladyao, Chat…	Thailand, Taiwan	http://dx.doi.org/10.1016/j.antiviral.2019.104697	English	Article	2020	Antiviral Research	No	4.101	Natural Products
In silico identification of potential inhibitors from Cinnamon against main protease and spike glycoprotein of SARS CoV-2.	Prasanth DSNBK Murahari M Chandramohan V Panda SP Atmakuri LR Guntupalli C	Prasanth, D S N B K. Pharmacognosy Research Division, K L College of Pharmacy, Koneru Lakshmaiah Education Foundation, Vaddeswaram, India. Murahari, Manikanta. Department of Pharmaceutical Chemistry, Faculty of Pharmacy, M.S. Ramaiah University of Applied Sciences, Bangalore, India. Chandramohan, Vivek. Department of Biotechnology, Siddaganga Institute of Technology, Tumakuru, India. Panda, Siva …	India	https://dx.doi.org/10.1080/07391102.2020.1779129	English	Journal Article	2020	Journal of Biomolecular Structure & Dynamics	No	N/A	Phytochemicals
In silico screening of Chinese herbal medicines with the potential to directly inhibit 2019 novel coronavirus.	Zhang D.-H. Wu K.-L. Zhang X. Deng S.-Q. Peng B.	(Zhang, Zhang, Peng) Shanghai Health Commission Key Lab of Artificial Intelligence (AI)-Based Management of Inflammation and Chronic Diseases, Sino-French Cooperative Central Lab, Shanghai Pudong Gongli Hospital, Secondary Military Medical University, Shanghai 200135, China (Wu) Department of Traditional Chinese Medicine, Shanghai Pudong Gongli Hospital, Secondary Military Medical University, Sha…	China	http://dx.doi.org/10.1016/j.joim.2020.02.005	English	Article	2020	Journal of Integrative Medicine	Yes	2.446	TCM
In silico screening of natural compounds against COVID-19 by targeting Mpro and ACE2 using molecular docking.	Joshi T Joshi T Sharma P Mathpal S Pundir H Bhatt V Chandra S	Joshi, T. Department of Biotechnology, Kumaun University, Bhimtal Campus, Bhimtal, Uttarakhand, India. scjnu@yahoo.co.in.	India	https://dx.doi.org/10.26355/eurrev_202004_21036	English	Journal Article	2020	European Review for Medical & Pharmacological Sciences	No	3.024	Phytochemicals
Indigenous knowledge based herbal medicine for corona (COVID-19) treatment	Shinwari Z.K., Qaiser M., Nasar M.Q., Ali A.	National Council for Tibb, Islamabad, Pakistan; Botanical Garden, University of Karachi, Karachi, 75270, Pakistan; Agriculture Research Institute, Quetta, Balochistan, Pakistan; Università Cattolica del Sacro Cuore, Via Emilia Parmense, Piacenza, Italy	Pakistan, Italy	10.30848/PJB2020-4(13)	English	Article	2020	Pakistan Journal of Botany	No	0.8	Indigenous Medicine
Insights into the inhibitory potential of selective phytochemicals against Mpro of 2019-nCoV: a computer-aided study.	Rasool N Akhtar A Hussain W	Rasool, Nouman. 1Dr Panjwani Center for Molecular Medicine and Drug Research, International Center for Chemical and Biological Sciences, University of Karachi, Karachi, 75270 Pakistan. Rasool, Nouman. Center for Professional Studies, Lahore, Pakistan. Akhtar, Ammara. 2Department of Life Sciences, University of Management and Technology, Lahore, Pakistan. Hussain, Waqar. 3National Center of Artifi…	Pakistan	https://dx.doi.org/10.1007/s11224-020-01536-6	English	Journal Article	2020	Structural Chemistry	No	2.081	Phytochemicals
In-silico investigation of phytochemicals from Asparagus racemosus as plausible antiviral agent in COVID-19.	Chikhale RV Sinha SK Patil RB Prasad SK Shakya A Gurav N Prasad R Dhaswadikar SR Wanjari M Gurav SS	Chikhale, Rupesh V. School of Pharmacy, University of East Anglia, Norwich, UK. Sinha, Saurabh K. Department of Pharmaceutical Sciences, Mohanlal Shukhadia University, Udaipur, India. Patil, Rajesh B. Sinhgad Technical Education Society's, Smt. Kashibai Navale College of Pharmacy, Pune, India. Prasad, Satyendra K. Department of Pharmaceutical Sciences, R.T.M. University, Nagpur, India. Shakya, An…	England, India	https://dx.doi.org/10.1080/07391102.2020.1784289	English	Journal Article	2020	Journal of Biomolecular Structure & Dynamics	No	N/A	Phytochemicals
Interim Management of COVID-19 by Repurposed Homeopathic Medicines.	Basu N. Das B.C. Tandon S.	(Basu, Das, Tandon) Amity Institute Molecular Medicine & Stem Cell Research, Amity University, Noida, India	India	http://dx.doi.org/10.1055/s-0040-1713004	English	Article	2020	Homeopathy : the journal of the Faculty of Homeopathy	Yes	1.704	Homeopathy
Interpretation of the Traditional Chinese Medicine portion of the diagnosis and treatment protocol for corona virus disease 2019 (Trial Version 7). [Review]	Song P Zhao L Li X Su J Jiang Z Song B Liu W Tang S Lei Y Ding Q Yang Z Lin J Wei Y Tong X	Song, Ping. International Cooperation Division, China Academy of Chinese Medical Sciences, Beijing 100700, China. Zhao, Linhua. Department of Endocrinology, Guang'anmen Hospital, China Academy of Chinese Medical Sciences, Beijing 100053, China. Li, Xiuyang. Department of Endocrinology, Guang'anmen Hospital, China Academy of Chinese Medical Sciences, Beijing 100053, China. Su, Jiansen. Tianjin Tas…	China	https://dx.doi.org/10.19852/j.cnki.jtcm.2020.03.019	English	Journal Article Research Support, Non-U.S. Gov't Review	2020	Journal of Traditional Chinese Medicine	Yes	0.676	TCM
Intra-Rater and Inter-Rater Reliability of Tongue Coating Diagnosis in Traditional Chinese Medicine Using Smartphones: Quasi-Delphi Study.	Wang Z.C. Zhang S.P. Yuen P.C. Chan K.W. Chan Y.Y. Cheung C.H. Chow C.H. Chua K.K. Hu J. Hu Z. Lao B. Leung C.C. Li H. Zhong L. Liu X. Liu Y. Liu Z. Lun X. Mo W. Siu S.Y. Xiong Z. Yeung W.F. Zhang R.Y. Zhang X.	(Wang, Zhang, Chan, Cheung, Chow, Chua, Hu, Li, Zhong, Liu, Lun, Siu, Zhang) School of Chinese Medicine, Hong Kong Baptist University, Kowloon Tong, Kowloon, Hong Kong, HK (Yuen) School of Computing Science, Hong Kong Baptist University, Hong Kong (Chan) Department of Medicine, University of Hong Kong, Hong Kong (Hu) Shanghai Ninth People's Hospital, Shanghai Jiao Tong University School of Medici…	Hong Kong, China	http://dx.doi.org/10.2196/16018	English	Article	2020	JMIR mHealth and uHealth	No	4.313	TCM
Intravenous vitamin C for reduction of cytokines storm in acute respiratory distress syndrome.	Boretti A. Banik B.K.	(Boretti, Banik) Prince Mohammad Bin Fahd University, P.O. Box 1664, Al Khobar 31952, Saudi Arabia	Saudi Arabia	http://dx.doi.org/10.1016/j.phanu.2020.100190	English	Review	2020	PharmaNutrition	No	N/A	Vitamin C
Investigation into SARS-CoV-2 Resistance of Compounds in Garlic Essential Oil.	Thuy BTP My TTA Hai NTT Hieu LT Hoa TT Thi Phuong Loan H Triet NT Anh TTV Quy PT Tat PV Hue NV Quang DT Trung NT Tung VT Huynh LK Nhung NTA	Thuy, Bui Thi Phuong. Faculty of Fundamental Science, Van Lang University, 45 Nguyen Khac Nhu Street, Ho Chi Minh City 700000, Viet Nam. My, Tran Thi Ai. Department of Chemistry, University of Sciences, Hue University, 77 Nguyen Hue Street, Hue City 530000, Vietnam. Hai, Nguyen Thi Thanh. Department of Chemistry, University of Sciences, Hue University, 77 Nguyen Hue Street, Hue City 530000, Vietn…	Vietnam	https://dx.doi.org/10.1021/acsomega.0c00772	English	Journal Article	2020	ACS Omega	No	2.87	Garlic Essential Oil
Is a vitamin D fortification strategy needed?	Buttriss J.L., Lanham-New S.A.	British Nutrition Foundation, London, United Kingdom; University of Surrey, Guildford, United Kingdom	England	10.1111/nbu.12430	English	Editorial	2020	Nutrition Bulletin	No	N/A	Vitamin D
Is melatonin deficiency a unifying pathomechanism of high risk patients with COVID-19?.	Simko F. Reiter R.J.	(Simko) Institute of Pathophysiology, Faculty of Medicine, Comenius University, Sasinkova 4, Bratislava 811 08, Slovakia (Simko) Institute of Experimental Endocrinology, Biomedical Research Center, Slovak Academy of Sciences, Bratislava, Slovakia (Reiter) Department of Cell Systems and Anatomy, UT Health San Antonio, San Antonio, TX, United States	Slovakia, United States	http://dx.doi.org/10.1016/j.lfs.2020.117902	English	Review	2020	Life Sciences	No	3.647	Melatonin
Is traditional Chinese medicine useful in the treatment of COVID-19?.	Zhang K.	(Zhang) Department of Acupuncture and Moxibustion, Tianjin Gong An Hospital, No. 78 Nanjing Road ,Heping District, Tianjin 300042, China	China	http://dx.doi.org/10.1016/j.ajem.2020.03.046	English	Letter	2020	American journal of emergency medicine	No	1.911	TCM
Is vitamin D effective against COVID-19?. [Italian]	de Fiore R.			http://dx.doi.org/10.1701/3366.33416	Italian	Note	2020	Recenti Progressi in Medicina	No	N/A	Vitamin D
Is Vitamin D One of the Key Elements in COVID-19 Days?	Aslan M.T., Aslan I.Ö., Özdemir Ö.	Istanbul University Istanbul Faculty of Medicine, Department of Pediatrics, Division of Neonatology, Istanbul, Turkey; University of Health Sciences, Bakirkoy Dr. Sadi Konuk Training and Research Hospital, Department of Obstetrics and Gynecology, Istanbul, Turkey; Sakarya University, Training and Research Hospital, Department of Pediatrics, Division of Allergy and Immunology, Sakarya, Turkey	Turkey	10.1007/s12603-020-1413-5	English	Letter	2020	Journal of Nutrition, Health and Aging	No	2.791	Vitamin D
Letter in response to the article: Vitamin D concentrations and COVID-19 infection in UK biobank (Hastie et al.).	Grant W.B. McDonnell S.L.	(Grant) Sunlight, Nutrition, and Health Research Center, P.O. Box 641603, San Francisco, CA 94164-1603, United States (McDonnell) GrassrootsHealth, Encinitas, CA 92024, United States	United States	http://dx.doi.org/10.1016/j.dsx.2020.05.046	English	Letter	2020	Diabetes and Metabolic Syndrome: Clinical Research and Reviews	No	N/A	Vitamin D
Letter: Covid-19, and vitamin D.	Panarese A. Shahini E.	(Panarese) Department of Gastroenterology and Digestive Endoscopy, National Institute of Gastroenterology, "Saverio De Bellis" Research Hospital, Castellana Grotte (Bari), Italy (Shahini) Istituto di Candiolo, FPO-IRCCS, Candiolo (Torino), Italy	Italy	http://dx.doi.org/10.1111/apt.15752	English	Letter	2020	Alimentary Pharmacology and Therapeutics	No	7.515	Vitamin D
Letter: Covid-19, and vitamin D. Authors' reply.	Tian Y. Rong L.	(Tian, Rong) Department of Endoscopy Center, Peking University First Hospital, Beijing, China	China	http://dx.doi.org/10.1111/apt.15764	English	Letter	2020	Alimentary Pharmacology and Therapeutics	No	7.515	Vitamin D
Letter: does vitamin D have a potential role against COVID-19? Authors' reply.	Tian Y. Rong L.	(Tian, Rong) Department of Endoscopy Center, Peking University First Hospital, Beijing, China	China	http://dx.doi.org/10.1111/apt.15817	English	Letter	2020	Alimentary Pharmacology and Therapeutics	No	7.515	Vitamin D
Letter: does vitamin D have a potential role against COVID-19?.	Kumar D. Gupta P. Banerjee D.	(Kumar, Banerjee) Department of Experimental Medicine and Biotechnology, Postgraduate Institute of Medical Education and Research, Chandigarh, India (Gupta) Division of Innovation & Translational Research, Indian Council of Medical Research (ICMR), New Delhi, India	India	http://dx.doi.org/10.1111/apt.15801	English	Letter	2020	Alimentary Pharmacology and Therapeutics	No	7.515	Vitamin D
Letter: low population mortality from COVID-19 in countries south of latitude 35 degrees North supports vitamin D as a factor determining severity.	Mansur J.	(Mansur) Universidad Nacional de la Plata Facultad de Ciencias Medicas, Center of Endocrin and Osteop, Buenos Aires, Argentina	Argentina	http://dx.doi.org/10.1111/apt.15820	English	Letter	2020	Alimentary Pharmacology and Therapeutics	No	7.515	Vitamin D
Letter: low population mortality from COVID-19 in countries south of latitude 35 degrees North supports vitamin D as a factor determining severity. Authors' reply.	Rhodes J.M. Subramanian S. Laird E. Anne Kenny R.	(Rhodes, Subramanian) Emeritus of Medicine, Department of Cellular and Molecular Physiology, Institute of Translational Medicine, University of Liverpool, Nuffield Building, Crown Street, Liverpool L69 3GE, United Kingdom (Laird) The Irish Longitudinal Study on Ageing, School of Medicine, Trinity College Dublin, Ireland (Anne Kenny) Department of Medical Gerontology, 6th floor, Mercers Institute …	England, Ireland	http://dx.doi.org/10.1111/apt.15823	English	Letter	2020	Alimentary Pharmacology and Therapeutics	No	7.515	Vitamin D
Lianhuaqingwen exerts anti-viral and anti-inflammatory activity against novel coronavirus (SARS-CoV-2).	Runfeng L. Yunlong H. Jicheng H. Weiqi P. Qinhai M. Yongxia S. Chufang L. Jin Z. Zhenhua J. Haiming J. Kui Z. Shuxiang H. Jun D. Xiaobo L. Xiaotao H. Lin W. Nanshan Z. Zifeng Y.	(Runfeng, Weiqi, Qinhai, Chufang, Jin, Haiming, Nanshan, Zifeng) State Key Laboratory of Respiratory Disease, National Clinical Research Center for Respiratory Disease, Guangzhou Institute of Respiratory Health, The First Affiliated Hospital of Guangzhou Medical University, Guangzhou Guangdong, China (Zifeng) State Key Laboratory of Quality Research in Chinese Medicine, Macau Institute for Applie…	China	http://dx.doi.org/10.1016/j.phrs.2020.104761	English	Article	2020	Pharmacological Research	No	5.893	TCM
Lungs as target of COVID-19 infection: Protective common molecular mechanisms of vitamin D and melatonin as a new potential synergistic treatment.	Martin Gimenez V.M. Inserra F. Tajer C.D. Mariani J. Ferder L. Reiter R.J. Manucha W.	(Martin Gimenez) Institute of Research in Chemical Sciences, School of Chemical and Technological Sciences, Cuyo Catholic University, San Juan, Argentina (Inserra, Ferder) Maimonides University, Buenos Aires, Argentina (Tajer) Department of Cardiovascular Disease, Hospital de Alta Complejidad El Cruce, Calchaqui 5401, Florencio Varela, Provincia de Buenos Aires 1418857983, Argentina (Mariani) Dep…	Argentina, United States	http://dx.doi.org/10.1016/j.lfs.2020.117808	English	Review	2020	Life Sciences	No	3.647	Vitamin D, Melatonin
Marine Algal Antioxidants as Potential Vectors for Controlling Viral Diseases.	Sansone C Brunet C Noonan DM Albini A	Sansone, Clementina. Stazione Zoologica Anton Dohrn, Villa Comunale, 80121 Naples, Italy. Brunet, Christophe. Stazione Zoologica Anton Dohrn, Villa Comunale, 80121 Naples, Italy. Noonan, Douglas M. Laboratory of Vascular Biology and Angiogenesis, IRCCS MultiMedica, 20138 Milan, Italy. Noonan, Douglas M. Department of Biotechnology and Life Sciences, University of Insubria, 211000 Varese, Italy. A…	Italy	https://dx.doi.org/10.3390/antiox9050392	English	Journal Article	2020	Antioxidants	No	5.014	Marine Algal Antioxidants
Marine natural compounds as potents inhibitors against the main protease of SARS-CoV-2-a molecular dynamic study.	Khan M.T. Ali A. Wang Q. Irfan M. Khan A. Zeb M.T. Zhang Y.-J. Chinnasamy S. Wei D.-Q.	(Khan) Department of Bioinformatics and Biosciences, Capital University of Science and Technology, Pakistan (Ali, Wang, Khan, Chinnasamy, Wei) State Key Laboratory of Microbial Metabolism, School of Life Sciences and Biotechnology, and Joint Laboratory of International Cooperation in Metabolic and Developmental Sciences, Ministry of Education, Shanghai Jiao Tong University, Shanghai, China (Irfan…	Pakistan, China, United States	http://dx.doi.org/10.1080/07391102.2020.1769733	English	Article	2020	Journal of Biomolecular Structure and Dynamics	No	N/A	Marine Natural Products
Meditation and Yoga Practices as Potential Adjunctive Treatment of SARS-CoV-2 Infection and COVID-19: A Brief Overview of Key Subjects.	Bushell W. Castle R. Williams M.A. Brouwer K.C. Tanzi R.E. Chopra D. Mills P.J.	(Bushell) Massachusetts Institute of Technology, MA, Cambridge, United States (Bushell, Castle, Chopra) Chopra Library for Integrative Studies, Whole Health Institute, Bentonville, United States (Williams) Department of Epidemiology, Harvard T.H. Chan School of Public Health, MA, Boston, United States (Brouwer) Division of Global Health, Infectious Disease Epidemiology, Department of Family Medic…	United States	http://dx.doi.org/10.1089/acm.2020.0177	English	Article	2020	Journal of Alternative & Complementary Medicine (New York, N.Y.)	Yes	2.109	Meditation, Yoga
Melatonin Inhibits COVID-19-induced Cytokine Storm by Reversing Aerobic Glycolysis in Immune Cells: A Mechanistic Analysis.	Reiter RJ Sharma R Ma Q Dominquez-Rodriguez A Marik PE Abreu-Gonzalez P	Reiter, Russel J. Department of Cell Systems and Anatomy, UT Health San Antonio, San Antonio, TX, United States of America. Sharma, Ramaswamy. Department of Cell Systems and Anatomy, UT Health San Antonio, San Antonio, TX, United States of America. Ma, Qiang. Department of Cell Systems and Anatomy, UT Health San Antonio, San Antonio, TX, United States of America. Dominquez-Rodriguez, Alberto. Dep…	United States, Spain	https://dx.doi.org/10.1016/j.medidd.2020.100044	English	Editorial	2020	Medicine in Drug Discovery	No	N/A	Melatonin
Melatonin is a potential adjuvant to improve clinical outcomes in individuals with obesity and diabetes with coexistence of Covid-19	El-Missiry M.A., El-Missiry Z.M.A., Othman A.I.	Zoology Department, Faculty of Science, Mansoura University, Mansoura, Egypt; Department of Oro-maxillofacial Surgery, Faculty of Dentistry, Mansoura University, Mansoura, Egypt	Egypt	10.1016/j.ejphar.2020.173329	English	Review	2020	European Journal of Pharmacology	No	3.263	Melatonin
Melatonin Restores Neutrophil Functions and Prevents Apoptosis amid Dysfunctional Glutathione Redox System.	NaveenKumar SK Hemshekhar M Jagadish S Manikanta K Vishalakshi GJ Kemparaju K Girish KS	NaveenKumar, Somanathapura K. Department of Studies in Biochemistry, University of Mysore, Manasagangotri, Mysuru, 570 006, India. Hemshekhar, Mahadevappa. Department of Studies in Biochemistry, University of Mysore, Manasagangotri, Mysuru, 570 006, India. Jagadish, Swamy. Department of Studies in Biochemistry, University of Mysore, Manasagangotri, Mysuru, 570 006, India. Manikanta, Kurnegala. De…	India	https://dx.doi.org/10.1111/jpi.12676	English	Journal Article	2020	Journal of Pineal Research	No	14.528	Melatonin
Melatonin, coronavirus, cardiovascular disease, and the geriatric emergency: let's use everything we have!.	Dominguez-Rodriguez A Reiter RJ Abreu-Gonzalez P Marik PE	Dominguez-Rodriguez, Alberto. Departamento de Cardiologia, Hospital Universitario de Canarias San Cristobal de La Laguna, Santa Cruz de Tenerife, Spain; Facultad de Ciencias de la Salud, Universidad Europea de Canarias, La Orotava, Santa Cruz de Tenerife, Spain; Centro de Investigacion Biomedica en Red Enfermedades Cardiovaculares, CIBERCV, Madrid, Spain. Electronic address: adrvdg@hotmail.com. R…	Spain, United States	https://dx.doi.org/10.1016/j.rec.2020.06.005	English Spanish	Letter	2020	Revista Espanola de Cardiologia	No	4.642	Melatonin
Melatonin: Roles in influenza, Covid-19, and other viral infections.	Anderson G. Reiter R.J.	(Anderson) CRC Scotland & London, London, United Kingdom (Reiter) Department of Cellular and Structural Biology, University of Texas Health Science at San Antonio, San Antonio, TX, United States	England, United States	http://dx.doi.org/10.1002/rmv.2109	English	Review	2020	Reviews in Medical Virology	No	4.221	Melatonin
Microbial Natural Products as Potential Inhibitors of SARS-CoV-2 Main Protease (Mpro).	Sayed AM Alhadrami HA El-Gendy AO Shamikh YI Belbahri L Hassan HM Abdelmohsen UR Rateb ME	Sayed, Ahmed M. Department of Pharmacognosy, Faculty of Pharmacy, Nahda University, 62513 Beni-Suef, Egypt. Alhadrami, Hani A. Department of Medical Laboratory Technology, Faculty of Applied Medical Sciences, King Abdulaziz University, Jeddah 21589, Saudi Arabia. Alhadrami, Hani A. Special Infectious Agent Unit, King Fahd Medical Research Centre, King Abdulaziz University, Jeddah 21589, Saudi Ara…	Egypt, Saudi Arabia, Switzerland, Scotland	https://dx.doi.org/10.3390/microorganisms8070970	English	Journal Article	2020	Microorganisms	No	4.152	Microbial Natural Products
Microbiota Modulating Nutritional Approaches to Countering the Effects of Viral Respiratory Infections Including SARS-CoV-2 through Promoting Metabolic and Immune Fitness with Probiotics and Plant Bioactives. [Review]	Shinde T Hansbro PM Sohal SS Dingle P Eri R Stanley R	Shinde, Tanvi. Centre for Food Innovation, Tasmanian Institute of Agriculture, University of Tasmania, Launceston, TAS 7250, Australia. Shinde, Tanvi. Gut Health Research Group, School of Health Sciences, College of Health and Medicine, University of Tasmania, Launceston, TAS 7250, Australia. Hansbro, Philip M. Centre for Inflammation, Centenary Institute, Sydney, NSW 2050, and University of Tech…	Australia	https://dx.doi.org/10.3390/microorganisms8060921	English	Journal Article Review	2020	Microorganisms	No	4.152	Probiotics, Plant Bioactives
Misinformation about spinal manipulation and boosting immunity: an analysis of Twitter activity during the COVID-19 crisis.	Kawchuk G. Hartvigsen J. Harsted S. Nim C.G. Nyiro L.	(Kawchuk) Department of Physical Therapy, University of Alberta, Edmonton, Canada (Hartvigsen, Harsted) Department of Sports Science and Clinical Biomechanics, University of Southern Denmark, Odense, Denmark (Hartvigsen) Nordic Institute of Chiropractic and Clinical Biomechanics, Odense, Denmark (Nim) Medical Research Unit, University Hospital of Southern Denmark, Middelfart, Denmark (Nim) Depart…	Canada, Denmark, Switzerland	http://dx.doi.org/10.1186/s12998-020-00319-4	English	Article	2020	Chiropractic and Manual Therapies	Yes	1.512	Spinal Manipulative Therapy
Myth Busters: Dietary Supplements and COVID-19.	Adams K.K. Baker W.L. Sobieraj D.M.	(Adams, Baker, Sobieraj) University of Connecticut, Storrs, CT, United States (Baker, Sobieraj) Hartford Hospital, Hartford, CT, United States	United States	http://dx.doi.org/10.1177/1060028020928052	English	Note	2020	Annals of Pharmacotherapy	No	2.406	Dietary Supplements
Natural antiviral compound silvestrol modulates human monocyte-derived macrophages and dendritic cells	Blum L., Geisslinger G., Parnham M.J., Grünweller A., Schiffmann S.	Pharmazentrum Frankfurt/ZAFES, Institute of Clinical Pharmacology, Goethe-University Hospital Frankfurt, Frankfurt am Main, Germany; Branch for Translational Medicine and Pharmacology TMP, Fraunhofer Institute for Molecular Biology and Applied Ecology IME, Frankfurt am Main, Germany; Institute of Pharmaceutical Chemistry, Philipps-University Marburg, Marburg, Germany	Germany	10.1111/jcmm.15360	English	Article	2020	Journal of Cellular and Molecular Medicine	No	4.486	Silvestrol
Natural bioactive compounds from fungi as potential candidates for protease inhibitors and immunomodulators to apply for coronaviruses	Suwannarach N., Kumla J., Sujarit K., Pattananandecha T., Saenjum C., Lumyong S.	Research Center of Microbial Diversity and Sustainable Utilization, Chiang Mai University, Chiang Mai, 50200, Thailand; Department of Biology, Faculty of Science, Chiang Mai University, Chiang Mai, 50200, Thailand; Division of Biology, Faculty of Science and Technology, Rajamangala University of Technology Thanyaburi, Thanyaburi, Pathumthani, 12110, Thailand; Department of Pharmaceutical Sciences…	Thailand	10.3390/molecules25081800	English	Review	2020	Molecules	No	3.267	Fungi
Natural compounds from Clerodendrum spp. as possible therapeutic candidates against SARS-CoV-2: An in silico investigation.	Kar P Sharma NR Singh B Sen A Roy A	Kar, Pallab. Bioinformatics Facility, Department of Botany, University of North Bengal, Siliguri, India. Sharma, Neeta Raj. Department of Biotechnology, Lovely Professional University, Phagwara, India. Singh, Bhupender. Department of Biotechnology, Lovely Professional University, Phagwara, India. Sen, Arnab. Bioinformatics Facility, Department of Botany, University of North Bengal, Siliguri, Indi…	India	https://dx.doi.org/10.1080/07391102.2020.1780947	English	Journal Article	2020	Journal of Biomolecular Structure & Dynamics	No	N/A	Phytochemicals
Natural product-derived phytochemicals as potential agents against coronaviruses: A review.	Mani J.S. Johnson J.B. Steel J.C. Broszczak D.A. Neilsen P.M. Walsh K.B. Naiker M.	(Mani, Johnson, Steel, Neilsen, Walsh, Naiker) School of Health, Medical and Applied Sciences, CQUniversity, Bruce Hwy, North Rockhampton, QLD, Australia (Broszczak) Institute of Health & Biomedical Innovation (Q-Block), Queensland University of Technology, Kelvin Grove Campus, QLD, Australia (Naiker) Centre for Indigenous Health Equity Research, CQUniversity, Bruce Hwy, North Rockhampton, QLD, A…	Australia	http://dx.doi.org/10.1016/j.virusres.2020.197989	English	Review	2020	Virus Research	No	2.934	Phytochemicals
Natural products and their derivatives against coronavirus: A review of the non-clinical and pre-clinical data.	Islam M.T. Sarkar C. El-Kersh D.M. Jamaddar S. Uddin S.J. Shilpi J.A. Mubarak M.S.	(Islam) Laboratory of Theoretical and Computational Biophysics, Ton Duc Thang University, Ho Chi Minh City, Vietnam (Islam) Faculty of Pharmacy, Ton Duc Thang University, Ho Chi Minh City, Vietnam (Sarkar, Jamaddar) Department of Pharmacy, Bangabandhu Sheikh Mujibur Rahman Science and Technology University, Bangladesh, Gopalganj, Bangladesh (El-Kersh) Pharmacognosy Department, Faculty of Pharmacy…	Vietnam, Bangladesh, Egypt, Jordan	http://dx.doi.org/10.1002/ptr.6700	English	Review	2020	Phytotherapy Research	Yes	4.087	Natural Products
Natural Products as Potential Leads Against Coronaviruses: Could They be Encouraging Structural Models Against SARS-CoV-2?. [Review]	Orhan IE Senol Deniz FS	Orhan, Ilkay Erdogan. Department of Pharmacognosy, Faculty of Pharmacy, Gazi University, 06330, Ankara, Turkey. iorhan@gazi.edu.tr. Senol Deniz, F Sezer. Department of Pharmacognosy, Faculty of Pharmacy, Gazi University, 06330, Ankara, Turkey.	Turkey	https://dx.doi.org/10.1007/s13659-020-00250-4	English	Journal Article Review	2020	Natural Products & Bioprospecting	Yes	N/A	Natural Products
Natural products may interfere with SARS-CoV-2 attachment to the host cell.	Elfiky A.A.	(Elfiky) Biophysics Department, Faculty of Sciences, Cairo University, Giza, Egypt	Egypt	http://dx.doi.org/10.1080/07391102.2020.1761881	English	Article	2020	Journal of biomolecular structure & dynamics	No	N/A	Natural Products
Network pharmacological approach for elucidating the mechanisms of traditional Chinese medicine in treating COVID-19 patients.	Pan H.-D. Yao X.-J. Wang W.-Y. Lau H.-Y. Liu L.	(Pan, Yao, Wang, Liu) State Key Laboratory of Quality Research in Chinese Medicine/Macao, Institute for Applied Research in Medicine and Health, Macau University of Science and Technology, Macao, China (Lau) Queen Mary Hospital, Hong Kong	China, Hong Kong	http://dx.doi.org/10.1016/j.phrs.2020.105043	English	Letter	2020	Pharmacological Research	No	5.893	TCM
Network pharmacology-based analysis of the role of traditional Chinese herbal medicines in the treatment of COVID-19.	Yu S. Wang J. Shen H.	(Yu, Wang, Shen) Department of Emergency Medicine, Shengjing Hospital of China Medical University, Shenyang 110004, China	China	http://dx.doi.org/10.21037/apm.2020.03.27	English	Article	2020	Annals of palliative medicine	No	1.681	TCM
No, Bananas Don’t Cure HIV, Nor Will Garlic Cure COVID-19: Searching for, Assessing, and Consuming Health Information Online	Phillips K.	Penn State University, University Park, PA, United States	United States	10.1080/15398285.2020.1755149	English	Article	2020	Journal of Consumer Health on the Internet	No	N/A	Garlic
On the brighter side of COVID-19 induced Lockdown: Devising the collateral methods to provide Ayurveda consultation during impasse.	Rastogi S Singh N Pandey P	Rastogi, Sanjeev. Gathiya Clinic, Department of Kaya Chikitsa, State Ayurvedic College and Hospital, Lucknow -226003. Singh, Neelendra. Gathiya Clinic, Department of Kaya Chikitsa, State Ayurvedic College and Hospital, Lucknow -226003. Pandey, Preeti. Gathiya Clinic, Department of Kaya Chikitsa, State Ayurvedic College and Hospital, Lucknow -226003.	India	https://dx.doi.org/10.1016/j.jaim.2020.05.001	English	Journal Article	2020	Journal of Ayurveda and Integrative Medicine	Yes	N/A	Ayurveda
Opioids/cannabinoids as a potential therapeutic approach in COVID-19 patients.	Tahamtan A. Tavakoli-Yaraki M. Salimi V.	(Tahamtan) Infectious Diseases Research Centre, Golestan University of Medical Sciences, Gorgan, Iran, Islamic Republic of (Tahamtan) Department of Microbiology, School of Medicine, Golestan University of Medical Sciences, Gorgan, Iran, Islamic Republic of (Tavakoli-Yaraki) Department of Clinical Biochemistry, Cancer Research Laboratory, School of Medical Sciences, Tarbiat Modares University, Teh…	Iran	http://dx.doi.org/10.1080/17476348.2020.1787836	English	Editorial	2020	Expert review of respiratory medicine	No	2.725	Opioids, Cannabinoids
Opportunities and challenges of traditional Chinese medicine going abroad for COVID-19 treatment.	Huang X.-Q. Zhou M.-Y. Cheng Y.-R. Ye L. Wang M.-W. Chen J. Zhao L.-J. Feng Z.-H.	(Huang) Zhejiang Provincial Integrated Chinese and Western Medicine Hospital, Hangzhou 310003, China (Wang, Chen) Affiliated Hospital of Hangzhou Normal University, Hangzhou 310015, China (Cheng) Zhejiang Academy of Medical Sciences, Hangzhou 310012, China (Zhou, Cheng) Hangzhou Medical College, Hangzhou 311300, China (Ye) Basic Medical College, Guizhou Medical University, Guizhou 550004, China (…	China	http://dx.doi.org/10.1016/j.ajem.2020.06.008	English	Letter	2020	American Journal of Emergency Medicine	No	1.911	TCM
Optimisation of vitamin d status for enhanced immuno-protection against covid-19	McCartney D.M., Byrne D.G.	School of Biological and Health Sciences, College of Sciences & Health, Technological University Dublin-City Campus, Kevin Street, Dublin, D08 NF82, Ireland; Department of Internal Medicine, St. James’s Hospital, James’s Street, Dublin 8, Ireland; Dept. of Clinical Medicine, School of Medicine, Trinity College Dublin, Dublin 2, Ireland	Ireland		English	Article	2020	Irish Medical Journal	No	N/A	Vitamin D
Pay attention to situation of SARS-CoV-2 and TCM advantages in treatment of novel coronavirus infection.	Liu C.-X.	(Liu) Innovation Research Station, Research Center of Modern Chinese Materia Medica, Tianjin Institute of Pharmaceutical Research, Tianjin 300462, China (Liu) State Key Laboratory of Drug Delivery Technology and Pharmacokinetics, Tianjin Institute of Pharmaceutical Research, Tianjin 300462, China (Liu) Tianjin Binhai Research Center for Food and Drug Regulatory Science, Tianjin 300462, China	China	http://dx.doi.org/10.1016/j.chmed.2020.03.004	English	Review	2020	Chinese Herbal Medicines	Yes	N/A	TCM
Perspective: improving vitamin D status in the management of COVID-19.	Ebadi M. Montano-Loza A.J.	(Ebadi, Montano-Loza) Division of Gastroenterology & Liver Unit, University of Alberta Hospital, Edmonton, AB, Canada	Canada	http://dx.doi.org/10.1038/s41430-020-0661-0	English	Review	2020	European Journal of Clinical Nutrition	No	3.291	Vitamin D
Perspective: Vitamin D deficiency and COVID-19 severity - plausibly linked by latitude, ethnicity, impacts on cytokines, ACE2, and thrombosis (R1).	Rhodes JM Subramanian S Laird E Griffin G Kenny RA	Rhodes, Jonathan M. Emeritus Professor of Medicine, Department of Cellular and Molecular Physiology, Institute of Translational Medicine, University of Liverpool, Nuffield Building, Crown Street, Liverpool, L69 3GE, United Kingdom. Subramanian, Sreedhar. Department of Cellular and Molecular Physiology, Institute of Translational Medicine, University of Liverpool, Nuffield Building, Crown Street, …	England, Ireland	https://dx.doi.org/10.1111/joim.13149	English	Journal Article	2020	Journal of Internal Medicine	No	6.871	Vitamin D
Phototherapy and vitamin D: the importance in COVID-19 era.	Megna M. Fabbrocini G. Villani A.	(Megna, Fabbrocini, Villani) Section of Dermatology, Department of Clinical Medicine and Surgery, University of Naples Federico II, Naples, Italy	Italy	http://dx.doi.org/10.1080/09546634.2020.1781044	English	Letter	2020	Journal of dermatological treatment	No	2.156	Vitamin D
Phytochemical compositions and biological activities of essential oils from the leaves, rhizomes and whole plant of hornstedtia bella Škorničk	Donadu M.G., Le N.T., Ho D.V., Doan T.Q., Le A.T., Raal A., Usai M., Marchetti M., Sanna G., Madeddu S., Rappelli P., Diaz N., Molicotti P., Carta A., Piras S., Usai D., Nguyen H.T., Cappuccinelli P., Zanetti S.	Department of Biomedical Sciences, University of Sassari, Sassari, 07100, Italy; Department of Chemistry and Pharmacy, University of Sassari, Sassari, 07100, Italy; Faculty of Pharmacy, Hue University of Medicine and Pharmacy, Hue University, Hue, 49000, Viet Nam; Mientrung Institute for Scientific Research, VAST, Hue, 49000, Viet Nam; Institute of Pharmacy, Faculty of Medicine, University of Tar…	Italy, Vietnam, Estonia	10.3390/antibiotics9060334	English	Article	2020	Antibiotics	No	3.893	Phytochemicals, Essential Oils
Phytotherapeutics and SARS-CoV-2 infection: Potential role of bioflavonoids.	Coppola M. Mondola R.	(Coppola) Department of Addiction, ASL CN2, Corso Coppino 46, Alba (CN) 12051, Italy (Mondola) Department of Mental Health, ASL CN1, Via Torino 70/B, Saluzzo (CN) 12037, Italy	Italy	http://dx.doi.org/10.1016/j.mehy.2020.109766	English	Letter	2020	Medical Hypotheses	No	1.375	Flavonoids
Phytotherapic compounds against coronaviruses: Possible streams for future research	Antonelli M., Donelli D., Maggini V., Firenzuoli F.	Institute of Public Health, University of Parma, Parma, Italy; CERFIT, Careggi University Hospital, Florence, Italy; Terme di Monticelli, Parma, Italy; AUSL-IRCCS Reggio Emilia, Reggio Emilia, Italy; SCMIC, Reggio Emilia, Italy; Referring Center for Phytotherapy of Tuscany Region (CERFIT), Careggi University Hospital, Florence, Italy	Italy	10.1002/ptr.6712	English	Letter	2020	Phytotherapy Research	Yes	4.087	Phytotherapy
Point of view: Should COVID-19 patients be supplemented with vitamin D?.	Annweiler C. Cao Z. Sabatier J.-M.	(Annweiler) Department of Geriatric Medicine and Memory Clinic, Research Center on Autonomy and Longevity, University Hospital, Angers, France (Annweiler) University of Angers, UPRES EA 4638, Angers, France (Annweiler) Robarts Research Institute, Department of Medical Biophysics, Schulich School of Medicine and Dentistry, The University of Western Ontario, London, ON, Canada (Cao) State Key Labor…	France, Canada, China	http://dx.doi.org/10.1016/j.maturitas.2020.06.003	English	Review	2020	Maturitas	No	3.63	Vitamin D
Possible role of vitamin D in Covid-19 infection in pediatric population.	Panfili F.M. Roversi M. D'Argenio P. Rossi P. Cappa M. Fintini D.	(Panfili, Roversi) Pediatric Academic Department, University of Rome Tor Vergata, Rome, Italy (D'Argenio, Rossi) Division of Immunology and Infectious Diseases, University-Hospital Pediatric Department (DPUO), Bambino Gesu Children's Hospital, IRCSS, Rome, Italy (Cappa, Fintini) Endocrinology Unit, University-Hospital Pediatric Department (DPUO), Bambino Gesu Children's Hospital, IRCSS, Rome, Ita…	Italy	http://dx.doi.org/10.1007/s40618-020-01327-0	English	Review	2020	Journal of Endocrinological Investigation	No	3.397	Vitamin D
Possible therapy strategies for Covid 19 infections using Chinese Herbs. [German]	Thede C.	(Thede) Gorch-Fock-Weg 16, Neustadt/Holstein 23730, Germany	Germany	http://dx.doi.org/10.1007/s00052-020-0260-0	German	Article	2020	Chinesische Medizin	Yes	N/A	TCM
Potential of Flavonoid-Inspired Phytomedicines against COVID-19.	Ngwa W. Kumar R. Thompson D. Lyerly W. Moore R. Reid T.-E. Lowe H. Toyang N.	(Ngwa) Brigham and Women's Hospital, Dana-Farber Cancer Institute, Harvard Medical School, Boston MA 02115, United States (Kumar) Northeastern University, Boston, MA, USA; R&D Biomedical Materials, Millipore Sigma, Milwaukee, WI 02115, USA (Thompson, Lyerly, Moore) Global Research and Discovery Group Sciences, FL 33884, Winter Haven, United States (Reid) School of Pharmacy, Concordia University o…	United States	http://dx.doi.org/10.3390/molecules25112707	English	Article	2020	Molecules (Basel, Switzerland)	No	3.267	Flavonoid
Potential role of vitamin d in the elderly to resist covid-19 and to slow progression of parkinson's disease.	Hribar C.A. Cobbold P.H. Church F.C.	(Hribar, Church) Department of Pathology and Laboratory Medicine, The University of North Carolina at Chapel Hill School of Medicine, Chapel Hill, NC 27759, United States (Cobbold) Department of Human Anatomy and Cell Biology, University of Liverpool, Liverpool L69 3EG, United Kingdom	United States, England	http://dx.doi.org/10.3390/brainsci10050284	English	Review	2020	Brain Sciences	No	3.332	Vitamin D
Potential use of Turmeric in COVID-19.	Gupta H Gupta M Bhargava S	Gupta, H. Department of Anesthesiology, Government Medical College, Jammu, India. Gupta, M. Treatwell Skin Centre, Jammu, India. Bhargava, S. Department of Dermatology, R. D. Gardi Medical College, Ujjain, India.	India	https://dx.doi.org/10.1111/ced.14357	English	Letter	2020	Clinical & Experimental Dermatology	No	1.977	Turmeric
Preliminary study of traditional Chinese medicine for preventing COVID-19 based on data mining. [Chinese]	Zhao X. Zhang L.-X. Lu X.-J.	(Zhao, Lu) Chengdu University of Traditional Chinese Medicine, Chengdu 610075, China (Zhao, Lu) Sichuan Key Laboratory of Ophthalmopathy Prevention & Cure and Visual Function Protection with TCM, Chengdu 610075, China (Zhang) Henan University of Traditional Chinese Medicine, Zhengzhou 450000, China	China	http://dx.doi.org/10.7501/j.issn.0253-2670.2020.05.008	Chinese	Article	2020	Chinese Traditional and Herbal Drugs	Yes	N/A	TCM
Primary understanding of syndrome differentiation treatment of COVID-19 with traditional Chinese medicine based on 3-5 edition of Diagnosis and Treatment of Novel Coronavirus Pneumonia and ancient literatures. [Chinese]	Li B.-L. Li X.-Y. Ren S.-P. Liu Z.-H.	(Li, Li, Ren, Liu) The Hospital of Shanxi University of Traditional Chinese Medicine, Taiyuan 030024, China	China	http://dx.doi.org/10.7501/j.issn.0253-2670.2020.04.007	Chinese	Article	2020	Chinese Traditional and Herbal Drugs	Yes	N/A	TCM
Probiotics and COVID-19: is there any link?.	Akour A.	(Akour) Department of Biopharmaceutics and Clinical Pharmacy, School of Pharmacy, The University of Jordan Queen Rania Street, Amman 11942, Jordan (Akour) Department of Pharmacy, Faculty of Pharmacy, Al-Zaytoonah University of Jordan Queen Rania Street, Amman 11942, Jordan	Jordan	http://dx.doi.org/10.1111/lam.13334	English	Article	2020	Letters in applied microbiology	No	2.173	Probiotics
Probiotics and COVID-19: one size does not fit all.	Mak J.W.Y. Chan F.K.L. Ng S.C.	(Mak, Chan, Ng) Center for Gut Microbiota Research, Department of Medicine and Therapeutics, Institute of Digestive Disease, The Chinese University of Hong Kong, Hong Kong Special Administrative Region, China	China	http://dx.doi.org/10.1016/S2468-1253%2820%2930122-9	English	Letter	2020	The Lancet Gastroenterology and Hepatology	No	14.789	Probiotics
Public Health Approach of Ayurveda and Yoga for COVID-19 Prophylaxis.	Tillu G. Chaturvedi S. Chopra A. Patwardhan B.	(Tillu, Patwardhan) AYUSH Center of Excellence, Center for Complementary and Integrative Health, Savitribai Phule Pune University, Pune, India (Chaturvedi) Dr. D.Y. Patil Vidyapeeth (DPU), Pune, India (Chopra) Center for Rheumatic Diseases, Pune, India	India	http://dx.doi.org/10.1089/acm.2020.0129	English	Note	2020	Journal of Alternative & Complementary Medicine	Yes	2.109	Ayurveda, Yoga
Putative inhibitors of SARS-COV-2 main protease from a library of marine natural products: A virtual screening and molecular modeling study.	Gentile D. Patamia V. Scala A. Sciortino M.T. Piperno A. Rescifina A.	(Gentile, Patamia) Department of Drug Sciences, University of Catania, V.le A. Doria, Catania 95125, Italy (Scala, Sciortino, Piperno) Department of Chemical, Biological, Pharmaceutical, and Environmental Sciences, University of Messina, V.le F. Stagno d'Alcontres 31, Messina 98166, Italy (Rescifina) Consorzio Interuniversitario Nazionale di ricerca in Metodologie e Processi Innovativi di Sintesi…	Italy	http://dx.doi.org/10.3390/md18040225	English	Article	2020	Marine Drugs	Yes	4.073	Marine Natural Products
Rapid establishment of traditional Chinese medicine prevention and treatment of 2019-nCoV based on clinical experience and molecular docking. [Chinese]	Niu M. Wang R.-L. Wang Z.-X. Zhang P. Bai Z.-F. Jing J. Guo Y.-M. Zhao X. Zhan X.-Y. Zhang Z.-T. Song X.-A. Qin E.-Q. Wang J.-B. Xiao X.-H.	(Niu, Bai, Guo, Zhao, Zhan, Zhang, Wang) China Military Institute of Chinese Medicine, Fifth Medical Center of Chinese PLA General Hospital Beijing 100039, China (Wang, Wang, Zhang, Jing, Song) Integrative Medical Center, Fifth Medical Center of Chinese PLA General Hospital Beijing 100039, China (Qin) Infectious Disease Treatment and Investigation Center, Fifth Medical Center of Chinese PLA Gener…	China	http://dx.doi.org/10.19540/j.cnki.cjcmm.20200206.501	Chinese	Article	2020	Zhongguo Zhong yao za zhi = Zhongguo zhongyao zazhi = China journal of Chinese materia medica	Yes	N/A	TCM
Recognition of Natural Products as Potential Inhibitors of COVID-19 Main Protease (Mpro): In-Silico Evidences.	Narkhede RR Pise AV Cheke RS Shinde SD	Narkhede, Rohan R. Department of Medicinal Chemistry, National Institute of Pharmaceutical Education and Research (NIPER), Raebareli, Lucknow, 226002, India. Pise, Ashwini V. Department of Medicinal Chemistry, National Institute of Pharmaceutical Education and Research (NIPER), Raebareli, Lucknow, 226002, India. Cheke, Rameshwar S. Department of Pharmaceutical Chemistry, Dr. Rajendra Gode College…	India	https://dx.doi.org/10.1007/s13659-020-00253-1	English	Journal Article	2020	Natural Products & Bioprospecting	Yes	N/A	Natural Products
Reply to "The use of traditional Chinese medicines to treat SARS-CoV-2 may cause more harm than good".	Zhang A.-H. Ren J.-L. Wang X.-J.	(Zhang, Ren, Wang) National Chinmedomics Research Center, Heilongjiang University of Chinese Medicine, Sino-America Chinmedomics Technology Collaboration Center, Heping Road 24, Harbin, China	China	http://dx.doi.org/10.1016/j.phrs.2020.104775	English	Letter	2020	Pharmacological Research	No	5.893	TCM
Reply to Jakovac: About COVID-19 and vitamin D.	Facchiano A. Bartoli M. Ricci A. Facchiano F.	(Facchiano) National Research Council, CNR-ISA, Avellino, Italy (Facchiano) Istituto Dermopatico Dell'Immacolata, IDI-IRCCS, Rome, Italy (Bartoli) Department of Ophthalmology, Medical College of Georgia, Augusta University, Augusta, GA, United States (Ricci) Department of Clinical and Molecular Medicine, Division of Respiratory Diseases, Sant'Andrea Hospital Sapienza University of Rome, Rome, Ita…	Italy, United States	http://dx.doi.org/10.1152/ajpendo.00185.2020	English	Letter	2020	American Journal of Physiology - Endocrinology and Metabolism	No	3.469	Vitamin D
Reply to Jakovac; Severity of COVID-19 infection in patients with phenylketonuria: is vitamin D status protective?.	Rocha J.C. Calhau C. MacDonald A.	(Rocha, Calhau) Nutrition & Metabolism, Nova Medical School, Faculdade de Ciencias Medicas, Universidade Nova de Lisboa, Lisbon, Portugal (Rocha, Calhau) Center for Health Technology and Services Research (CINTESIS), Porto, Portugal (MacDonald) Department of Dietetics, Birmingham Children's Hospital, Birmingham, United Kingdom	Portugal, England	http://dx.doi.org/10.1152/ajpendo.00195.2020	English	Letter	2020	American Journal of Physiology - Endocrinology and metabolism	No	3.469	Vitamin D
Reply: "Vitamin D Supplementation in Influenza and COVID-19 Infections. Comment on: Evidence That Vitamin D Supplementation Could Reduce Risk of Influenza and COVID-19 Infections and Deaths Nutrients 2020, 12(4), 988".	Grant WB Baggerly CA Lahore H	Grant, William B. Sunlight, Nutrition, and Health Research Center, P.O. Box 641603, San Francisco, CA 94164-1603, USA. Baggerly, Carole A. GrassrootsHealth, Encinitas, CA 95101, USA. Lahore, Henry. 2289 Highland Loop, Port Townsend, WA 98368, USA.	United States	https://dx.doi.org/10.3390/nu12061620	English	Journal Article	2020	Nutrients	No	4.546	Vitamin D
Reply: Vitamin C as a Possible Therapy for COVID-19.	Kim SB Yeom JS	Kim, Sun Bean. Division of Infectious Diseases, Department of Internal Medicine, Korea University College of Medicine, Seoul, Korea. Yeom, Joon Sup. Department of Internal Medicine, Severance Hospital, Yonsei University College of Medicine, Seoul, Korea. joonsup.yeom@yuhs.ac.	South Korea		English	Letter	2020	Infection & Chemotherapy	No	1.722	Vitamin C
Repurposing of FDA-approved antivirals, antibiotics, anthelmintics, antioxidants, and cell protectives against SARS-CoV-2 papain-like protease.	Kandeel M Abdelrahman AHM Oh-Hashi K Ibrahim A Venugopala KN Morsy MA Ibrahim MAA	Kandeel, Mahmoud. Department of Biomedical Sciences, College of Veterinary Medicine, King Faisal University, Al-ahsa, Saudi Arabia. Kandeel, Mahmoud. Department of Pharmacology, Faculty of Veterinary Medicine, Kafrelshikh University, Kafrelshikh, Egypt. Abdelrahman, Alaa H M. Computational Chemistry Laboratory, Chemistry Department, Faculty of Science, Minia University, Minia, Egypt. Oh-Hashi, Ke…	Saudi Arabia, Egypt, Japan	https://dx.doi.org/10.1080/07391102.2020.1784291	English	Journal Article	2020	Journal of Biomolecular Structure & Dynamics	No	N/A	Antioxidants
Repurposing therapeutic agents and herbal medicines to defeat viral nemesis	Caputo L., Lentini G., Habtemariam S.	Institute of Sciences of Food Production (CNR-ISPA), National Council of Research, Bari, Italy; Department of Pharmacy—Pharmaceutical Sciences, University of Bari Aldo Moro, Bari, Italy; Pharmacognosy Research Laboratories and Herbal Analysis Services UK, University of Greenwich, Kent, United Kingdom	Italy, England	10.1002/ddr.21668	English	Note	2020	Drug Development Research	No	1.902	Herbal Medicine
Research progress of intervention of Chinese herbal medicine and its active components on human coronavirus. [Chinese]	Zhang Y.-S. Cong W.-H. Zhang J.-J. Guo F.-F. Li H.-M.	(Zhang, Zhang, Guo, Li) Institute of Chinese Materia Medica, China Academy of Chinese Medical Sciences Beijing 100700, China (Cong) Xiyuan Hospital, China Academy of Chinese Medical Sciences Beijing 100091, China	China	http://dx.doi.org/10.19540/j.cnki.cjcmm.20200219.501	Chinese	Review	2020	Zhongguo Zhong yao za zhi = Zhongguo zhongyao zazhi = China journal of Chinese materia medica	Yes	N/A	TCM
Research progress on prevention and treatment of cytokine storm with traditional Chinese medicine. [Chinese]	Yin M.-X. Cao Y. Shi C.-Y. Wang W.-Q. Fang J.-G.	(Yin, Cao, Shi, Wang, Fang) Department of Pharmacy, Tongji Hospital Affiliated to Tongji Medical College, Huazhong University of Science and Technology, Wuhan 430030, China	China	http://dx.doi.org/10.7501/j.issn.0253-2670.2020.05.001	Chinese	Article	2020	Chinese Traditional and Herbal Drugs	Yes	N/A	TCM
Research strategy of drugs against 2019-novel coronavirus based on supramolecular "qi chromatography" theory of TCM. [Chinese]	He F.-Y. Deng K.-W. Pan X. Zhou Y.-Q.	(He, Pan, Zhou) College of Pharmacy, Hunan University of Chinese Medicine, Changsha 410208, China (He, Deng, Pan, Zhou) Hunan Key laboratory of Druggability and Preparation Modification of TCM, Changsha 410208, China (He, Zhou) Laboratory of Processing and Pharmaceutical Preparation Engineering Technology of TCM, Hunan University of Chinese Medicine, Changsha 410208, China (Deng) The First Clinic…	China	http://dx.doi.org/10.7501/j.issn.0253-2670.2020.03.001	Chinese	Article	2020	Chinese Traditional and Herbal Drugs	Yes	N/A	TCM
Response of Chiropractic Organizations to the COVID-19 Pandemic: A Descriptive Report.	Johnson C.D. Little C.S. Sterling T.A. Gojkovich S. Boghosian K. Ciolfi M.A.	(Johnson) National University of Health Sciences, Lombard, IL, United States (Little) Council on Chiropractic Education, Scottsdale, AZ, United States (Sterling) National Board of Chiropractic Examiners, Greeley, CO, United States (Gojkovich) National Chiropractic Mutual Insurance Company, Clive, IA, United States (Boghosian) Federation of Chiropractic Licensing Boards, Greeley, CO, United States…	United States	http://dx.doi.org/10.1016/j.jmpt.2020.04.001	English	Article	2020	Journal of Manipulative and Physiological Therapeutics	Yes	1.23	Chiropractic
Response of Practicing Chiropractors during the Early Phase of the COVID-19 Pandemic: A Descriptive Report.	Johnson C.D. Green B.N. Konarski-Hart K.K. Hewitt E.G. Napuli J.G. Foshee W.K. Brown J.W. Kopansky-Giles D. Stuber K.J. Lerede C. Charlton S.T. Field J.R. Botelho M.B. Da Silva K.L. Tonner G. Yap T.B. Gkolfinopoulos V.S. Quintero G. Agaoglu M.H.	(Johnson, Green) National University of Health Sciences, Lombard, IL, United States (Green) Stanford Health Care, San Diego, CA, United States (Konarski-Hart) Private practice, Little Rock, AR, United States (Hewitt) Private practice, Portland, OR, United States (Napuli) VA St. Louis Health Care System, St Louis, MO, United States (Foshee) Private practice, Dallas, TX, United States (Brown) Priva…	United States, Canada, Australia, England, Brazil, South Africa, Netherlands, Singapore, Greece, Colombia, Turkey	http://dx.doi.org/10.1016/j.jmpt.2020.05.001	English	Article	2020	Journal of Manipulative and Physiological Therapeutics	Yes	1.23	Chiropractic
Response to 'Vitamin D concentrations and COVID-19 infection in UK Biobank'.	Roy A.S. Matson M. Herlekar R.	(Roy, Matson, Herlekar) School of Clinical Medicine, Addenbrooke's Hospital, University of Cambridge, United Kingdom	England	http://dx.doi.org/10.1016/j.dsx.2020.05.049	English	Letter	2020	Diabetes and Metabolic Syndrome: Clinical Research and Reviews	No	N/A	Vitamin D
Reviews of Science for Science Librarians: Vitamins and Trace Elements that May Be Preventive or Ameliorating in This Age of Contagion	Stankus T.	University of Arkansas Libraries, Fayetteville, Arkansas, United States	United States	10.1080/0194262X.2020.1753630	English	Article	2020	Science and Technology Libraries	No	N/A	Vitamins and Trace Elements
Revisiting vitamin D and home-based exercises for patients with sleep apnea facing the COVID-19 quarantine.	Ekiz T. Kara M. Ozcakar L.	(Ekiz) Turkmenbasi Medical Center, Department of Physical Medicine and Rehabilitation, Adana, Turkey (Kara, Ozcakar) Hacettepe University Medical School, Department of Physical and Rehabilitation Medicine, Ankara, Turkey	Turkey	http://dx.doi.org/10.5664/jcsm.8586	English	Article	2020	Journal of clinical sleep medicine : JCSM : official publication of the American Academy of Sleep Medicine	No	3.586	Vitamin D, Exercise
Role of vitamin D in preventing of COVID-19 infection, progression and severity.	Ali N.	(Ali) Department of Biochemistry and Molecular Biology, Shahjalal University of Science and Technology, Sylhet 3114, Bangladesh	Bangladesh	http://dx.doi.org/10.1016/j.jiph.2020.06.021	English	Review	2020	Journal of Infection and Public Health	No	2.447	Vitamin D
Roles and challenges of traditional Chinese medicine in COVID-19 in Hong Kong.	Lin W.L. Hon K.L. Leung K.K.Y. Lin Z.X.	(Lin, Hon, Lin) Hong Kong Institute of Integrative Medicine, Faculty of Medicine, Chinese University of Hong Kong, Hong Kong (Hon, Leung) Department of Paediatrics and Adolescent Medicine, Hong Kong Children's Hospital, Hong Kong	Hong Kong	http://dx.doi.org/10.12809/hkmj208564	English	Letter	2020	Hong Kong medical journal = Xianggang yi xue za zhi	No	1.679	TCM
SARS-CoV-2 & Covid-19: Key-Roles of the 'Renin-Angiotensin' System / Vitamin D Impacting Drug and Vaccine Developments.	Cao Z. Wu Y. Faucon E. Sabatier J.-M.	(Cao, Wu) State Key Laboratory of Virology, Modern Virology Research Center, College of Life Sciences, Wuhan University, Wuhan 430072. China (Faucon) Bd Grignan 252 (Sabatier) Universite Aix-Marseille, Institut de Neuro-physiopathologie (INP), Faculte de Pharmacie, 27 Bd Jean Moulin	China, France	http://dx.doi.org/10.2174/1871526520999200505174704	English	Editorial	2020	Infectious disorders drug targets	No	N/A	Vitamin D
SARS-CoV2 induced respiratory distress: Can cannabinoids be added to anti-viral therapies to reduce lung inflammation?.	Byrareddy S.N. Mohan M.	(Byrareddy) Department of Pharmacology and Experimental Neuroscience, University of Nebraska Medical Center, Omaha, NE 68198, United States (Mohan) Texas Biomedical Research Institute, Southwest National Primate Research Center, San Antonio, TX 78227, United States	United States	http://dx.doi.org/10.1016/j.bbi.2020.04.079	English	Letter	2020	Brain, Behavior, and Immunity	No	6.633	Cannabis
SARS-CoV-2 pandemic and Vitamin D deficiency-A double trouble.	Alpalhao M. Filipe P.	(Alpalhao, Filipe) Dermatology Department, Hospital de Santa Maria, Centro Hospitalar Universitario Lisboa Norte EPE, Lisbon, Portugal (Alpalhao, Filipe) Dermatology Universitary Clinic, Faculty of Medicine, University of Lisbon, Lisbon, Portugal (Alpalhao, Filipe) Dermatology Research Unit, iMM Joao Lobo Antunes, University of Lisbon, Lisbon, Portugal	Portugal	http://dx.doi.org/10.1111/phpp.12579	English	Letter	2020	Photodermatology Photoimmunology and Photomedicine	No	2.387	Vitamin D
'Scientific Strabismus' or Two Related Pandemics: COVID-19 & Vitamin D Deficiency.	Kara M. Ekiz T. Ricci V. Kara O. Chang K.-V. Ozcakar L.	(Kara, Ozcakar) Department of Physical Medicine and Rehabilitation, Hacettepe University Medical School, Ankara, Turkey (Ekiz) Department of Physical Medicine and Rehabilitation, Turkmenbasl Medical Center, Adana, Turkey (Ricci) Irccs Rizzoli Orthopaedic Institute, Department of Biomedical and Neuromotor Science Physical and Rehabilitation Medicine Unit, Bologna, Italy (Kara) Ylldlrlm Beyazlt Uni…	Turkey, Italy, China	http://dx.doi.org/10.1017/S0007114520001749	English	Article	2020	British Journal of Nutrition	No	3.334	Vitamin D
Screening of anti-SARS-CoV-2 small molecular compounds from traditional Chinese medicine based on molecular docking [基于分子对接技术筛选抗严重急性呼吸综合征冠状病毒2中药小分子化合物]	Shen L.-L., Li Y., Zhou M., Qiao Y.-G., Sun Z.-X.	School of Life Sciences, Beijing University of Chinese Medicine, Beijing, 102488, China	China		Chinese	Article	2020	Chinese Journal of New Drugs	No	N/A	TCM
Should we try the antiinflammatory natural product, celastrol, for COVID-19?.	Habtemariam S. Nabavi S.F. Berindan-Neagoe I. Cismaru C.A. Izadi M. Sureda A. Nabavi S.M.	(Habtemariam) Pharmacognosy Research Laboratories and Herbal Analysis Services, University of Greenwich, Kent, United Kingdom (Nabavi, Izadi, Nabavi) Baqiyatallah Hospital, Baqiyatallah University of Medical Sciences, Tehran, Iran, Islamic Republic of (Berindan-Neagoe, Cismaru) Research Center for Functional Genomics, Biomedicine and Translational Medicine, "Iuliu Hatieganu" University of Medicin…	England, Iran, Romania, Spain	http://dx.doi.org/10.1002/ptr.6711	English	Letter	2020	Phytotherapy Research	Yes	4.087	Celastrol
Stilbene-based natural compounds as promising drug candidates against COVID-19.	Wahedi H.M. Ahmad S. Abbasi S.W.	(Wahedi, Abbasi) NUMS Department of Biological Sciences, National University of Medical Sciences, Rawalpindi, Pakistan (Ahmad) National Center of Bioinformatics, Quaid-i-Azam University, Islamabad, Pakistan	Pakistan	http://dx.doi.org/10.1080/07391102.2020.1762743	English	Article	2020	Journal of Biomolecular Structure and Dynamics	No	N/A	Stilbenes
Structure-based drug designing for potential antiviral activity of selected natural products from Ayurveda against SARS-CoV-2 spike glycoprotein and its cellular receptor.	Maurya V.K. Kumar S. Prasad A.K. Bhatt M.L.B. Saxena S.K.	(Maurya, Kumar, Prasad, Bhatt, Saxena) Department of Centre for Advanced Research (CFAR), Faculty of Medicine, King George's Medical University (KGMU), Lucknow 226003, India	India	http://dx.doi.org/10.1007/s13337-020-00598-8	English	Article	2020	VirusDisease	No	N/A	Ayurveda
Study on medication regularity of traditional Chinese medicine in treatment of COVID-19 based on data mining. [Chinese]	Zhou Z. Zhu C.-S. Zhang B.	(Zhou, Zhu) First Affiliated Hospital of Zhengzhou University Zhengzhou 450000, China (Zhang) Beijing University of Chinese Medicine Beijing 100102, China	China	http://dx.doi.org/10.19540/j.cnki.cjcmm.20200220.502	Chinese	Article	2020	Zhongguo Zhong yao za zhi = Zhongguo zhongyao zazhi = China journal of Chinese materia medica	Yes	N/A	TCM
Study on screening potential traditional Chinese medicines against 2019-nCoV based on Mpro and PLP. [Chinese]	Ma J. Huo X.-Q. Chen X. Zhu W.-X. Yao M.-C. Qiao Y.-J. Zhang Y.-L.	(Ma, Huo, Chen, Qiao, Zhang) State Administration of Traditional Chinese Medicine, Research Center of Traditional Chinese Medicine-Information Engineering, Key Technology of Traditional Chinese Medicine Pharmacy and New Drug Development Engineering Research Center of Ministry of Education, School of Chinese Materia Medica, Beijing University of Chinese Medicine Beijing 102488, China (Zhu) Qingyua…	China	http://dx.doi.org/10.19540/j.cnki.cjcmm.20200216.401	Chinese	Article	2020	Zhongguo Zhong yao za zhi = Zhongguo zhongyao zazhi = China journal of Chinese materia medica	Yes	N/A	TCM
Study on traditional Chinese medicine common syndrome characteristic of coronavirus disease 2019 based on latent structure combined with system clustering analysis. [Chinese]	Feng Z. Xie Y. Chun L. Li J.	(Feng, Xie, Chun, Li) Co-construction Collaborative Innovation Center for Chinese Medicine and Respiratory Diseases by Henan and Education Ministry of China, Henan Key Laboratory of Chinese Medicine for Respiratory Disease, Henan University of Chinese Medicine, Zhengzhou, Henan 450046, China (Xie) Department of Respiratory Diseases, First Affiliated Hospital of Henan University of Chinese Medicin…	China	http://dx.doi.org/10.3760/cma.j.cn121430-20200506-00620	Chinese	Article	2020	Zhonghua wei zhong bing ji jiu yi xue	No	N/A	TCM
Suggestions on design of evidence-based traditional Chinese medicine clinical study for new public health emergencies. [Chinese]	Wang L.-X. Xie Y.-M.	(Wang, Xie) Institute of Basic Research in Clinical Medicine, China Academy of Chinese Medical Sciences, Beijing 100700, China	China	http://dx.doi.org/10.19540/j.cnki.cjcmm.20200318.501	Chinese	Article	2020	Zhongguo Zhongyao Zazhi	Yes	N/A	TCM
Synergistic effect of Vitamin D and Remdesivir can fight COVID-19.	Arya A. Dwivedi V.D.	(Arya, Dwivedi) Center for Bioinformatics, Computational and Systems Biology, Pathfinder Research and Training Foundation, Greater Noida, India	India	http://dx.doi.org/10.1080/07391102.2020.1773929	English	Letter	2020	Journal of biomolecular structure & dynamics	No	N/A	Vitamin D
Targeting the gut-lung microbiota axis by means of a high-fibre diet and probiotics may have anti-inflammatory effects in COVID-19 infection.	Conte L Toraldo DM	Conte, Luana. Laboratory of InterDisciplinary Research Applied to Medicine (DReAM), University of Salento and ASL LE (Local Health Authority) at the "V. Fazzi" Hospital, Lecce, 73100, Puglia, Italy. Toraldo, Domenico Maurizio. Department of Rehabilitation, Respiratory Care Unit, ASL/Lecce, Puglia 73100, Italy.	Italy	https://dx.doi.org/10.1177/1753466620937170	English	Letter	2020	Therapeutic Advances in Respiratory Disease	No	3.095	Probiotics
TCM in the fight against COVID-19?: The traditional medicine from the Far East is expected to become an export hit, the benefit is unclear. [German]	Anonymous				German	Article	2020	Deutsche Apotheker Zeitung	No	N/A	TCM
TCMATCOV-a bioinformatics platform to predict efficacy of TCM against COVID-19. [Chinese]	Guo F.-F. Zhang Y.-Q. Tang S.-H. Tang X. Xu H. Liu Z.-Y. Huo R.-L. Li D. Yang H.-J.	(Guo, Tang, Tang, Xu) Institute of Chinese Materia Medica, China Academy of Chinese Medical Sciences, Beijing 100700, China (Zhang) Hebei University, Baoding 071002, China (Zhang, Liu, Li) State Key Laboratory of Proteomics, Beijing Proteome Research Center, Beijing Institute of Radiation Medicine, National Center for Protein Sciences (The PHOENIX Center, Beijing), Beijing 102206, China (Huo, Yan…	China	http://dx.doi.org/10.19540/j.cnki.cjcmm.20200312.401	Chinese	Article	2020	Zhongguo Zhongyao Zazhi	Yes	N/A	TCM
Telemedicine for Ayurveda consultation: Devising collateral methods during the COVID-19 lockdown impasse.	Rastogi S. Singh N. Pandey P.	(Rastogi, Singh, Pandey) Gathiya Clinic, Department of Kaya Chikitsa, State Ayurvedic College and Hospital, Lucknow 226003, India	India	http://dx.doi.org/10.1016/j.jaim.2020.05.001	English	Article	2020	Journal of Ayurveda and Integrative Medicine	Yes	N/A	Ayurveda
Testing of natural products in clinical trials targeting the SARS-CoV-2 (Covid-19) Viral Spike Protein-Angiotensin Converting Enzyme-2 (ACE2) interaction. [Review]	Williamson G Kerimi A	Williamson, Gary. Department of Nutrition, Dietetics and Food, School of Clinical Sciences at Monash Health, Faculty of Medicine, Nursing and Health Sciences, Monash University, BASE Facility, 264 Ferntree Gully Road, Notting Hill, VIC 3168, Australia. Electronic address: gary.williamson1@monash.edu. Kerimi, Asimina. Department of Nutrition, Dietetics and Food, School of Clinical Sciences at Mona…	Australia	https://dx.doi.org/10.1016/j.bcp.2020.114123	English	Journal Article Review	2020	Biochemical Pharmacology	No	4.96	Natural Products
The antiviral and coronavirus-host protein pathways inhibiting properties of herbs and natural compounds - Additional weapons in the fight against the COVID-19 pandemic?	Fuzimoto A.D., Isidoro C.	Holistic Sync - Holistic Integrative Medicine, United States; Dipartimento di Scienze della Salute, Università “A. Avogadro”, Novara, Italy	Italy	10.1016/j.jtcme.2020.05.003	English	Review	2020	Journal of Traditional and Complementary Medicine	Yes	N/A	Herbal Medicine, Natural Products
The benefits of Meditation and Mindfulness practices during times of crisis such as Covid-19.	Behan C.			http://dx.doi.org/10.1017/ipm.2020.38	English	Article	2020	Irish Journal of Psychological Medicine	No	N/A	Meditation, Mindfulness
The clinical benefits of Chinese patent medicines against COVID-19 based on current evidence.	Zhang D. Zhang B. Lv J.-T. Sa R.-N. Zhang X.-M. Lin Z.-J.	(Zhang, Zhang, Lv, Sa, Zhang, Lin) Department of Clinical Chinese Pharmacy, School of Chinese Materia Medica, Beijing University of Chinese Medicine, Beijing, China (Zhang) Center for Pharmacovigilance and Rational Use of Chinese Medicine, Beijing University of Chinese Medicine, Beijing, China (Sa) Pharmacy Department, Gansu Provincial Hospital, Lanzhou, China	China	http://dx.doi.org/10.1016/j.phrs.2020.104882	English	Review	2020	Pharmacological Research	No	5.893	TCM
The combined therapy of a traditional Chinese medicine formula and Western medicine for a critically ill case infected with COVID-19.	Zhang K. Tian M. Zeng Y. Wang L. Luo S. Xia W. Zhang X. Zha Y.	(Zhang, Zeng, Wang, Luo, Xia) Department of Traditional Chinese Medicine, Guizhou Provincial People's Hospital, Guiyang, Guizhou, China (Tian, Zha) Department of Nephrology, Institute of Nephritic and Urinary Disease, Guizhou Provincial People's Hospital, Guiyang, Guizhou, China (Zhang) Department of Pulmonary Medicine, NHC Key Laboratory of Pulmonary Immunological Diseases, Guizhou Provincial Pe…	China	http://dx.doi.org/10.1016/j.ctim.2020.102473	English	Article	2020	Complementary Therapies in Medicine	Yes	2.063	TCM
The dark side of COVID-19: The need of integrated medicine for children with special care needs.	Leoni C. Giorgio V. Onesimo R. Tarani L. Celli M. Selicorni A. Zampino G.	(Leoni, Giorgio, Onesimo, Zampino) Department of Woman and Child Health and Public Health, Center for Rare Diseases and Birth Defects, Fondazione Policlinico Universitario "A. Gemelli" IRCCS, Rome, Italy (Tarani) Pediatric Department, Sapienza University, Rome, Italy (Celli) Pediatric Department, Rare Bone Metabolism Center, Rome, Italy (Selicorni) Pediatric Unit, ASST Lariana, Como, Italy	Italy	http://dx.doi.org/10.1002/ajmg.a.61722	English	Letter	2020	American journal of medical genetics. Part A	No	2.125	General CAM
The database-based strategy may overstate the potential effects of traditional Chinese medicine against COVID-19.	Huang YX Wang WX Zhang S Tang YP Yue SJ	Huang, Yu-Xi. Key Laboratory of Shaanxi Administration of Traditional Chinese Medicine for TCM Compatibility, and State Key Laboratory of Research & Development of Characteristic Qin Medicine Resources (Cultivation), and Shaanxi Collaborative Innovation Center of Chinese Medicinal Resources Industrialization, Shaanxi University of Chinese Medicine, Xi'an, 712046, China. Wang, Wen-Xiao. Key Labora…	China	https://dx.doi.org/10.1016/j.phrs.2020.105046	English	Letter	2020	Pharmacological Research	No	5.893	TCM
The effect of massage on the quality of life in patients recovering from COVID-19: A systematic review protocol.	Wu L. Dong Y. Li J. Huang J. Wen D. Peng T. Luo J.	(Wu, Luo) Department of Tuina, Hospital of Chengdu University of Traditional Chinese Medicine (Dong, Li, Huang, Wen, Peng) College of Acupuncture and Tuina, Chengdu University of Traditional Chinese Medicine, Sichuan, China	China	http://dx.doi.org/10.1097/MD.0000000000020529	English	Article	2020	Medicine	No	1.552	Massage
The experience of treating patients with pneumonia secondary to the coronavirus disease 2019 using the Guizhi method of traditional Chinese medicine	Ma Y.-T., Wu Q.-Y., Lu S.-B., Qiu W.-M., Pan P., Xu M., Tang N.	Department of Traditional Chinese Medicine, Fourth People's Hospital of Nanning, Guangxi AIDS Clinical Treatment Center, Nanning, China; School of Chinese Medicine, Hong Kong Baptist University, Kowloon Tong, Hong Kong; Guangxi University of Traditional Chinese Medicine, Nanning, China	China, Hong Kong	10.4103/wjtcm.wjtcm_14_20	English	Article	2020	World Journal of Traditional Chinese Medicine	Yes	N/A	TCM
The important role of polysaccharides from a traditional Chinese medicine-Lung Cleansing and Detoxifying Decoction against the COVID-19 pandemic.	Cao P. Wu S. Wu T. Deng Y. Zhang Q. Wang K. Zhang Y.	(Cao, Wu, Wu, Deng, Zhang, Zhang) Department of Pharmacy, Union Hospital, Tongji Medical College, Huazhong University of Science and Technology, Wuhan 430022, China; Hubei Province Clinical Research Center for Precision Medicine for Critical Illness, Wuhan, 430022 China (Wang) School of Pharmacy, Tongji Medical College, Huazhong University of Science and Technology, Wuhan 430030, China	China	http://dx.doi.org/10.1016/j.carbpol.2020.116346	English	Review	2020	Carbohydrate polymers	No	7.182	TCM
The insidious threat of jamu and unregulated traditional medicines in the COVID-19 era	Lim M.A., Pranata R.	Faculty of Medicine, Universitas Pelita Harapan, Tangerang, Indonesia	Indonesia	10.1016/j.dsx.2020.06.022	English	Letter	2020	Diabetes and Metabolic Syndrome: Clinical Research and Reviews	No	N/A	TCM
The potential application of the traditional Chinese herb Exocarpium Citri grandis in the prevention and treatment of COVID-19.	Su W.-W. Wang Y.-G. Li P.-B. Wu H. Zeng X. Shi R. Zheng Y.-Y. Li P.-L. Peng W.	(Su, Wang, Li, Wu, Zeng, Shi, Zheng, Li, Peng) Guangdong Engineering & Technology Research Center for Quality and Efficacy Reevaluation of Post-Market Traditional Chinese Medicine, Guangdong Provincial Key Laboratory of Plant Resources, School of Life Sciences, Sun Yat-Sen University, Guangzhou 510275, China	China	http://dx.doi.org/10.12032/TMR20200406172	English	Review	2020	Traditional Medicine Research	Yes	N/A	TCM
The potential insights of Traditional Chinese Medicine on treatment of COVID-19.	Tong T. Wu Y.-Q. Ni W.-J. Shen A.-Z. Liu S.	(Tong, Wu, Ni, Shen, Liu) Department of Pharmacy, Anhui Provincial Hospital, First Affiliated Hospital of USTC, Division of Life Sciences and Medicine, University of Science and Technology of China, Hefei, Anhui 230001, China	China	http://dx.doi.org/10.1186/s13020-020-00326-w	English	Review	2020	Chinese Medicine (United Kingdom)	Yes	2.96	TCM
The potential of cannabidiol in the COVID-19 pandemic: a hypothesis letter.	Esposito G. Pesce M. Seguella L. Sanseverino W. Lu J. Corpetti C. Sarnelli G.	(Esposito, Seguella, Corpetti) Department of Physiology and Pharmacology "V. Erspamer", Sapienza University of Rome, Italy (Pesce, Sarnelli) Department of Clinical Medicine and Surgery, University of Naples "Federico II", Naples, Italy (Sanseverino) Sequentia Biotech SL, Barcelona, Spain (Lu) Department of Human Anatomy, College of Basic Medical Sciences, China Medical University, Liaoning, China	Italy, Spain, China	http://dx.doi.org/10.1111/bph.15157	English	Article	2020	British journal of pharmacology	No	7.73	Cannabidiol
The potential use of Persian herbal medicines against COVID-19 through angiotensin-converting enzyme 2.	Heidary F. Varnaseri M. Gharebaghi R.	(Heidary) Head of Ophthalmology Division, Taleghani Hospital, Ahvaz Jundishapur University of Medical Sciences, Padad Shahr, Ahvaz, Iran, Islamic Republic of (Varnaseri) Infectious Diseases Department, Razi Hospital, Ahvaz Jundishapur University of Medical Sciences, Ahvaz, Iran, Islamic Republic of (Gharebaghi) Kish International Campus, University of Tehran, Tehran, Iran, Islamic Republic of	Iran	http://dx.doi.org/10.5812/archcid.102838	English	Letter	2020	Archives of Clinical Infectious Diseases	No	N/A	Traditional Persian Medicine
The pros and cons of traditional Chinese medicines in the treatment of COVID-19.	Wang Y. Zeng X. Zhao Y. Chen W. Chen Y.Z.	(Wang, Zhao) The Institute of Drug Discovery Technology, Ningbo University, Ningbo 315211, China (Wang, Chen) Bioinformatics and Drug Design Group, Department of Pharmacy, National University of Singapore 117543, Singapore (Zeng) Department of Biological Medicines & Shanghai Engineering Research Center of Immunotherapeutics, Fudan University School of Pharmacy, Shanghai 201203, China (Chen) Key L…	China, Singapore	http://dx.doi.org/10.1016/j.phrs.2020.104873	English	Letter	2020	Pharmacological Research	No	5.893	TCM
The role of vitamin D in the prevention of coronavirus disease 2019 infection and mortality.	Ilie P.C. Stefanescu S. Smith L.	(Ilie) Research and Innovation Department, The Queen Elizabeth Hospital Foundation Trust, King's Lynn, United Kingdom (Stefanescu) The University of East Anglia, Norfolk, United Kingdom (Smith) The Cambridge Centre for Sport and Exercise Sciences, Anglia Ruskin University, Cambridge, United Kingdom	England	http://dx.doi.org/10.1007/s40520-020-01570-8	English	Article	2020	Aging Clinical and Experimental Research	No	2.697	Vitamin D
The use of internet analytics by a Canadian provincial chiropractic regulator to monitor, evaluate and remediate misleading claims regarding specific health conditions, pregnancy, and COVID-19.	Kawchuk G. Hartvigsen J. Innes S. Simpson J.K. Gushaty B.	(Kawchuk) University of Alberta, Edmonton, Canada (Hartvigsen) University of Southern Denmark, Odense, Denmark (Hartvigsen) Nordic Institute of Chiropractic and Clinical Biomechanics, Odense, Denmark (Innes, Simpson) Murdoch University, Perth, Australia (Gushaty) No Affiliation, Edmonton, Canada	Canada, Denmark, Australia	http://dx.doi.org/10.1186/s12998-020-00314-9	English	Article	2020	Chiropractic and Manual Therapies	Yes	1.512	Chiropractic
The use of traditional Chinese medicine (TCM)/acupuncture in the treatment and prevention of SARS-CoV-2 infections: White paper from the Scientific Chapter of the German Medical Association for Acupuncture. [German]	Fleckenstein J. Fuzeki E. Banzer W.	(Fleckenstein) Institut fur Komplementare und Integrative Medizin IKIM, Dozentur fur TCM/Akupunktur, Universitat Bern, Freiburgstr. 46, Haus 4, Bern 3010, Switzerland (Fuzeki, Banzer) Institut fur Arbeits-, Sozial- und Umweltmedizin, Universitatsklinikum Frankfurt, Theodor-Stern-Kai 7, Haus 9B, Frankfurt am Main 60590, Germany	Switzerland, Germany	http://dx.doi.org/10.1007/s42212-020-00271-7	German	Review	2020	Deutsche Zeitschrift fur Akupunktur	Yes	N/A	TCM, Acupuncture
The use of Traditional Chinese Medicines to treat SARS-CoV-2 may cause more harm than good.	Gray P.E. Belessis Y.	(Gray) Dept. of Immunology and Infectious Diseases, Sydney Children's Hospital, Sydney, Australia (Gray, Belessis) School of Women's and Children's Health, University of New South Wales, Sydney, Australia (Belessis) Dept. of Respiratory Medicine, Sydney Children's Hospital, Sydney, Australia	Australia	http://dx.doi.org/10.1016/j.phrs.2020.104776	English	Letter	2020	Pharmacological Research	No	5.893	TCM
Therapeutic Algorithm for Use of Melatonin in Patients With COVID-19.	Reiter R.J. Abreu-Gonzalez P. Marik P.E. Dominguez-Rodriguez A.	(Reiter) Department of Cell Systems and Anatomy, UT Health San Antonio, San Antonio, TX, United States (Abreu-Gonzalez) Department of Physiology, Faculty of Medicine, University of La Laguna, San Cristobal de La Laguna, Spain (Marik) Division of Pulmonary and Critical Care Medicine, Eastern Virginia Medical School, Norfolk, VA, United States (Dominguez-Rodriguez) Department of Cardiology, Hospita…	United States, Spain	http://dx.doi.org/10.3389/fmed.2020.00226	English	Review	2020	Frontiers in Medicine	No	3.9	Melatonin
Therapeutic targets and signaling mechanisms of vitamin C activity against sepsis: a bioinformatics study.	Li R. Guo C. Li Y. Qin Z. Huang W.			http://dx.doi.org/10.1093/bib/bbaa079	English	Article	2020	Briefings in bioinformatics	No	8.99	Vitamin C
Thinking on clinical rational use of TCM injection in the treatment of novel coronavirus pneumonia (COVID-19). [Chinese]	Wang Z.F. Wang Y.P. Zhang H.M. Fan Y.P. Lu C. Wang Y.Y.	(Wang, Wang, Fan, Lu, Wang) Institute of Basic Research in Clinical Medicine, China Academy of Chinese Medical Sciences, Beijing 100700, China (Zhang) Institute of Chinese Materia Medica, China Academy of Chinese Medical Sciences, Beijing 100700, China	China	http://dx.doi.org/10.3760/cma.j.cn112137-20200221-00388	Chinese	Article	2020	Zhonghua yi xue za zhi	No	N/A	TCM
Thoughts on prevention and treatment of coronavirus disease 2019 (COVID-19) by traditional Chinese medicine. [Chinese]	Chen J. Wang W.-Q. Shi C.-Y. Fang J.-G.	(Chen, Wang, Shi, Fang) Department of Pharmacy, Tongji Hospital of Tongji Medical College of Huazhong University of Science and Technology, Wuhan 430030, China	China	http://dx.doi.org/10.7501/j.issn.0253-2670.2020.05.003	Chinese	Article	2020	Chinese Traditional and Herbal Drugs	Yes	N/A	TCM
Time to realise the true potential of Ayurveda against COVID-19.	Golechha M.	(Golechha) Health Systems and Health Policy, Indian Institute of Public Health-Gandhinagar, India	India	http://dx.doi.org/10.1016/j.bbi.2020.05.003	English	Letter	2020	Brain, Behavior, and Immunity	No	6.633	Ayurveda
Traditional Chinese and Western Medicines Jointly Beat COVID-19 Pandemic.	Qing G.-C. Zhang H. Bai Y. Luo Y.	(Qing, Zhang, Bai, Luo) Center of Smart Laboratory and Molecular Medicine, Medical School of Chongqing University, Chongqing 400044, China (Qing, Zhang, Luo) Key Laboratory of Biorheological Science and Technology of Ministry of Education, School of Bioengineering, Chongqing University, Chongqing 400044, China	China	http://dx.doi.org/10.1007/s11655-020-3095-6	English	Article	2020	Chinese Journal of Integrative Medicine	Yes	1.545	TCM
Traditional Chinese Herbal Medication for corona-virus 2019	Hassan A.	Department of Chemistry, Government Post Graduate College Mardan, Abdul Wali Khan University, Mardan, Khyber Pakhtunkhwa 23200, Pakistan	Pakistan	10.1016/j.tmaid.2020.101810	English	Letter	2020	Travel Medicine and Infectious Disease	No	4.589	TCM
Traditional Chinese herbal medicine for treating novel coronavirus (COVID-19) pneumonia: Protocol for a systematic review and meta-Analysis.	Li Y. Liu X. Guo L. Li J. Zhong D. Zhang Y. Clarke M. Jin R.	(Li) School of Acupuncture-Moxibustion and Tuina, Chengdu University of Traditional Chinese Medicine, Chengdu, China (Liu, Li, Zhong, Jin) School of Health Preservation and Rehabilitation, Chengdu University of Traditional Chinese Medicine, Chengdu, China (Guo) Hospital of Chengdu University of Traditional Chinese Medicine, Chengdu, China (Zhang) West China Hospital, Sichuan University, Chengdu, …	China, Ireland	http://dx.doi.org/10.1186/s13643-020-01343-4	English	Article	2020	Systematic Reviews	No	2.479	TCM
Traditional Chinese medicine contributes to the treatment of COVID-19 patients.	Liu L.	(Liu) Academician of Chinese Academy of Engineering President & Chair Professor of Macau University of Science and Technology	China	http://dx.doi.org/10.1016/j.chmed.2020.04.003	English	Editorial	2020	Chinese Herbal Medicines	Yes	N/A	TCM
Traditional Chinese medicine for COVID-19 treatment.	Ren J.-L. Zhang A.-H. Wang X.-J.	(Ren, Zhang, Wang) Engineering Research Center of Efficacy Evaluation and Industrial Development of TCM Classic Formulae of the Ministry of Education, National Chinmedomics Research Center, Sino-America Chinmedomics Technology Collaboration Center, Heilongjiang University of Chinese Medicine, Heping Road 24, Harbin, China	China	http://dx.doi.org/10.1016/j.phrs.2020.104743	English	Letter	2020	Pharmacological Research	No	5.893	TCM
Traditional Chinese medicine for treatment of coronavirus disease 2019: A review.	Cui H.-T. Li Y.-T. Guo L.-Y. Liu X.-G. Wang L.-S. Jia J.-W. Liao J.-B. Miao J. Zhang Z.-Y. Wang L. Wang H.-W. Wen W.-B.	(Cui, Liu) Shandong Provincial Key Laboratory of Animal Cell and Developmental Biology, School of Life Sciences, Shandong University, Qingdao 250100, China (Li, Wang) College of Traditional Chinese Medicine, Tianjin University of Traditional Chinese Medicine, No.10 Poyanghu Road, Jinghai District, Tianjin 301617, China (Guo, Jia, Miao) Department of Integrated Traditional and Western Medicine, Ti…	China	http://dx.doi.org/10.12032/TMR20200222165	English	Review	2020	Traditional Medicine Research	Yes	N/A	TCM
Traditional Chinese medicine for treatment of COVID-19 based on literature mining of targeting cytokine storm. [Chinese]	Liu R.-P. Ge J.-D. Zhong Y. Zheng Q. Sun R.	(Liu, Zheng) School of Chinese Materia Medica, Beijing University of Chinese Medicine, Beijing 100029, China (Ge, Sun) Advanced Medical Research Institute, Shandong University, Jinan 250012, China (Ge) College of Pharmacy, Shandong University of Traditional Chinese Medicine, Jinan 250355, China (Zhong, Sun) The Second Hospital of Shandong University, Shandong University, Jinan 250033, China	China	http://dx.doi.org/10.7501/j.issn.0253-2670.2020.05.002	Chinese	Article	2020	Chinese Traditional and Herbal Drugs	Yes	N/A	TCM
Traditional Chinese Medicine in the Treatment of Patients Infected with 2019-New Coronavirus (SARS-CoV-2): A Review and Perspective.	Yang Y. Islam M.S. Wang J. Li Y. Chen X.	(Yang, Islam, Wang, Li, Chen) State Key Laboratory of Quality Research in Chinese Medicine, Institute of Chinese Medical Sciences, University of Macau, China	China	http://dx.doi.org/10.7150/ijbs.45538	English	Review	2020	International journal of biological sciences	No	4.858	TCM
Traditional Chinese medicine is a resource for drug discovery against 2019 novel coronavirus (SARS-CoV-2).	Ling C.-Q.	(Ling) School of Traditional Chinese Medicine, Naval Medical University, Shanghai 200433, China	China	http://dx.doi.org/10.1016/j.joim.2020.02.004	English	Editorial	2020	Journal of Integrative Medicine	Yes	2.446	TCM
Traditional Chinese medicine practices used in COVID-19 (Sars-cov 2/Coronavirus-19) treatment in clinic and their effects on the cardiovascular system. [Review]	Akalin E Ekici M Alan Z Ozbir Elevli E Yaman Bucak A Aobuliaikemu N Uresin AY	Akalin, Emine. Department of Pharmaceutical Botany, Istanbul University Faculty of Pharmacy, Istanbul, Turkey. Ekici, Mirac. Department of Pharmaceutical Botany, Istanbul University Faculty of Pharmacy, Istanbul, Turkey. Alan, Zinar. Department of Pharmaceutical Botany, Istanbul University Faculty of Pharmacy, Istanbul, Turkey. Ozbir Elevli, Elif. Department of Pharmaceutical Botany, Istanbul Uni…	Turkey	https://dx.doi.org/10.5543/tkda.2020.03374	English	Journal Article Review	2020	Turk Kardiyoloji Dernegi Arsivi	No	N/A	TCM
Traditional Chinese Medicine treatment of COVID-19.	Xu J. Zhang Y.	(Xu) Sichuan Integrative Medicine Hospital, Sichuan Province, Chengdu, China (Zhang) Sichuan Integrative Medicine Hospital, Sichuan Province, Chengdu, China	China	http://dx.doi.org/10.1016/j.ctcp.2020.101165	English	Letter	2020	Complementary therapies in clinical practice	Yes	1.77	TCM
Traditional Chinese Medicine: an effective treatment for 2019 novel coronavirus pneumonia (NCP).	DU H.-Z. HOU X.-Y. MIAO Y.-H. HUANG B.-S. LIU D.-H.	(DU, MIAO, HUANG, LIU) School of Pharmacy, Hubei University of Chinese Medicine, Wuhan 430065, China (HOU) Key Laboratory of Drug Quality Control and Pharmacovigilance (Ministry of Education), State Key Laboratory of Natural Medicine, China Pharmaceutical University, Nanjing 210009, China	China	http://dx.doi.org/10.1016/S1875-5364%2820%2930022-4	English	Review	2020	Chinese Journal of Natural Medicines	Yes	2.014	TCM
Treatment efficacy analysis of traditional Chinese medicine for novel coronavirus pneumonia (COVID-19): An empirical study from Wuhan, Hubei Province, China.	Luo E. Zhang D. Luo H. Liu B. Zhao K. Zhao Y. Bian Y. Wang Y.	(Luo, Zhang, Luo, Liu, Zhao, Bian, Wang) State Key Laboratory of Quality Research in Chinese Medicine, Institute of Chinese Medical Sciences, University of Macau, Macao (Zhao) First Affiliated Hospital, Liaoning University of Traditional Chinese Medicine, Shenyang, China (Zhao) Medical Treatment Expert Group to Support for Covid-19 Control in Jihe Hospital, Caidian District,Hubei province, Wuhan,…	China	http://dx.doi.org/10.1186/s13020-020-00317-x	English	Article	2020	Chinese Medicine (United Kingdom)	Yes	2.96	TCM
Treatment of COVID-19 guided by holistic view of traditional Chinese medicine-therapy aimed at both viral and host. [Chinese]	Yuan R. Xin Q.-Q. Tang S.-H. Cong W.-H.	(Yuan, Xin, Cong) Xiyuan Hospital, China Academy of Chinese Medical Sciences, Beijing 100091, China (Tang) Institute of Chinese Materia Medica, China Academy of Chinese Medical Sciences, Beijing 100700, China	China	http://dx.doi.org/10.19540/j.cnki.cjcmm.20200304.501	Chinese	Article	2020	Zhongguo Zhongyao Zazhi	Yes	N/A	TCM
Tripartite Combination of Candidate Pandemic Mitigation Agents: Vitamin D, Quercetin, and Estradiol Manifest Properties of Medicinal Agents for Targeted Mitigation of the COVID-19 Pandemic Defined by Genomics-Guided Tracing of SARS-CoV-2 Targets in Human Cells.	Glinsky GV	Glinsky, Gennadi V. Institute of Engineering in Medicine, University of California, San Diego, 9500 Gilman Dr. MC 0435, La Jolla, CA 92093-0435, USA.	United States	https://dx.doi.org/10.3390/biomedicines8050129	English	Journal Article	2020	Biomedicines	No	4.717	Vitamin D, Quercetin, Estradiol
Understanding and prevention of D-dimer elevation in coronavirus disease 2019 in traditional Chinese medicine. [Chinese]	Wang Q. Wang C. Mei J. He L. Li J. Liu S. Chen F.	(Wang) Graduate School, Hebei College of Traditional Chinese Medicine, Shijiazhuang, Hebei 050091, China (Wang) Basic Medical School, Hebei College of Traditional Chinese Medicine, Shijiazhuang, Hebei 050020, China (Mei, Li, Liu) Department of Emergency, Hebei Provincial Hospital of Traditional Chinese Medicine, China. Corresponding author: Chen Fenqiao, Shijiazhuang, Hebei 050011, China (He, Che…	China	http://dx.doi.org/10.3760/cma.j.cn121430-20200303-00124	Chinese	Article	2020	Zhonghua wei zhong bing ji jiu yi xue	No	N/A	TCM
Understanding of COVID-19 in children from different perspectives of traditional Chinese medicine and western medicine. [Chinese]	Zhu Y.-L. Yang B.-B. Wu F.	(Zhu, Yang, Wu) The Children's Hospital, Zhejiang University School of Medicine, National Clinical Research Center for Child Health, Hangzhou 310003, China	China	http://dx.doi.org/10.7501/j.issn.0253-2670.2020.04.009	Chinese	Article	2020	Chinese Traditional and Herbal Drugs	Yes	N/A	TCM
Understanding of guidance for acupuncture and moxibustion interventions on COVID-19 (Second edition) issued by CAAM.	Liu WH Guo SN Wang F Hao Y	Liu, Wei-Hong. Institute of Acupuncture and Moxibustion, China Academy of Chinese Medical Sciences, Beijing 100700, China (, 100700, ). Liu, Wei-Hong. China Association of Acupuncture-Moxibustion, China (, 100700, ). Guo, Sheng-Nan. Institute of Acupuncture and Moxibustion, China Academy of Chinese Medical Sciences, Beijing 100700, China (, 100700, ). Wang, Fang. Institute of Acupuncture and Moxi…	China	https://dx.doi.org/10.1016/j.wjam.2020.03.005	English	Journal Article	2020	World Journal of Acupuncturemoxibustion	Yes	0.67	Acupuncture, Moxibustion
Understanding of guidance for acupuncture and moxibustion interventions on COVID-19 (Second edition) issued by CAAM.	Escolano C.V.	(Escolano) Departamento de Anatomia y Embriologia Humanas, Facultad de Medicina, Universidad de Cadiz, Cadiz, Spain	Spain	http://dx.doi.org/10.1016/j.acu.2020.05.001	English, Spanish	Article	2020	Revista Internacional de Acupuntura	Yes	0.17	Acupuncture, Moxibustion
Unravelling lead antiviral phytochemicals for the inhibition of SARS-CoV-2 Mpro enzyme through in silico approach.	Gurung A.B. Ali M.A. Lee J. Farah M.A. Al-Anazi K.M.	(Gurung) Department of Basic Sciences and Social Sciences, North-Eastern Hill University, Shillong, Meghalaya 793022, India (Ali) Department of Botany and Microbiology, College of Science, King Saud University, Riyadh 11451, Saudi Arabia (Lee) Department of Environment and Forest Resources, Chungnam National University, 99 Daehak-ro, Yuseong-gu, Daejeon 34134, South Korea (Farah, Al-Anazi) Geneti…	India, Saudi Arabia, South Korea	http://dx.doi.org/10.1016/j.lfs.2020.117831	English	Article	2020	Life Sciences	No	3.647	Phytochemicals
Use of herbal drugs to treat COVID-19 should be with caution.	Yang Y.	(Yang) Department of Traditional Chinese Medicine, The Second Affiliated Hospital of Zhejiang University School of Medicine, Hangzhou 310009, China	China	http://dx.doi.org/10.1016/S0140-6736%2820%2931143-0	English	Letter	2020	The Lancet	No	60.392	Herbal Medicine
Using Probiotics to Flatten the Curve of Coronavirus Disease COVID-2019 Pandemic.	Baud D Dimopoulou Agri V Gibson GR Reid G Giannoni E	Baud, David. Materno-Fetal and Obstetrics Research Unit, Department Woman-Mother-Child, Lausanne University Hospital, University of Lausanne, Lausanne, Switzerland. Dimopoulou Agri, Varvara. Clinic of Neonatology, Department Woman-Mother-Child, Lausanne University Hospital, University of Lausanne, Lausanne, Switzerland. Gibson, Glenn R. Food and Nutritional Sciences, St Joseph's Hospital, The Uni…	Switzerland, England, Canada	https://dx.doi.org/10.3389/fpubh.2020.00186	English	Journal Article	2020	Frontiers in Public Health	No	2.483	Probiotics
Vaporization, bioactive formulations and a marine natural product: different perspectives on antivirals.	Manning T.J. Thomas-Richardson J. Cowan M. Beard T.	(Manning, Thomas-Richardson, Cowan, Beard) Chemistry, Valdosta State University, Valdosta, GA 31698, United States	United States	http://dx.doi.org/10.1016/j.drudis.2020.04.010	English	Short Survey	2020	Drug Discovery Today	No	7.321	Marine Natural Products
Virtual Screening of Natural Products against Type II Transmembrane Serine Protease (TMPRSS2), the Priming Agent of Coronavirus 2 (SARS-CoV-2).	Rahman N. Basharat Z. Yousuf M. Castaldo G. Rastrelli L. Khan H.	(Rahman, Yousuf) H.E.J. Research Institute of Chemistry, International Center for Chemical and Biological Sciences, University of Karachi, Karachi 75270, Pakistan (Basharat) Jamil-ur-Rahman Center for Genome Research, ICCBS, University of Karachi, Karachi 75270, Pakistan (Castaldo, Rastrelli) NUTRIKETO_LAB Unisa-"San Giuseppe Moscati" National Hospital (AORN), Contrada Amoretta, 83100 Avellino (A…	Pakistan, Italy	http://dx.doi.org/10.3390/molecules25102271	English	Article	2020	Molecules (Basel, Switzerland)	No	3.267	Natural Products
Vitamin c (Ovi) D; an unexplored option!	Ish P., Agrawal S., Gupta N.	Department of Pulmonary, Critical Care and Sleep Medicine, VMMC and Safdarjung Hospital, New Delhi, India; Department of Pulmonary Medicine, Medipulse Hospital, Jodhpur, Rajasthan, India; Department of Pulmonary, Critical Care and Sleep, VMMC and Safdarjung Hospital, New Delhi, India	India		English	Letter	2020	Infezioni in Medicina	No	N/A	Vitamin C
Vitamin C and coronavirus.	Simonson W.	(Simonson) Oregon State University, OR, Corvallis, United States	United States	http://dx.doi.org/10.1016/j.gerinurse.2020.05.002	English	Article	2020	Geriatric Nursing (New York, N.Y.)	No	1.678	Vitamin C
Vitamin C as a Possible Therapy for COVID-19.	Hemila H Chalker E	Hemila, Harri. Department of Public Health, University of Helsinki, Helsinki, Finland. harri.hemila@helsinki.fi. Chalker, Elizabeth. School of Public Health, University of Sydney, Sydney, Australia.	Finland, Australia		English	Letter Comment	2020	Infection & Chemotherapy	No	1.722	Vitamin C
Vitamin D and Coronavirus.	Simonson W	Simonson, William. Oregon State University, Corvallis, OR, United States. Electronic address: wsimonsonpharmd@gmail.com.	United States	https://dx.doi.org/10.1016/j.gerinurse.2020.06.011	English	Journal Article	2020	Geriatric Nursing	No	1.678	Vitamin D
Vitamin D and coronavirus: A new field of use?. [Italian]	Maestri E. Formoso G. da Cas R. Mammarella F. Guerrizio M.A. Trotta F.	(Maestri, Formoso) Azienda USL, IRCCS di Reggio Emilia, Ambulatorio di Endocrinologia, Guastalla (Reggio Emilia), Italy (da Cas) Istituto Superiore di Sanita (ISS), Roma, Italy (Mammarella, Guerrizio, Trotta) Agenzia Italiana del Farmaco (AIFA), Roma, Italy	Italy	http://dx.doi.org/10.1701/3347.33188	Italian	Article	2020	Recenti Progressi in Medicina	No	N/A	Vitamin D
Vitamin D and Covid-19: A Note of Caution.	Rabbitt L Slattery E	Rabbitt, L. Department of Clinical Pharmacology and Therapeutics, University Hospital Galway, Ireland. Slattery, E. Department of Gastroenterology, University Hospital Galway, Ireland.	Ireland		English	Letter	2020	Irish Medical Journal	No	N/A	Vitamin D
Vitamin D and Inflammation: Potential Implications for Severity of Covid-19.	Laird E Rhodes J Kenny RA	Laird, E. The Irish Longitudinal Study on Ageing, School of Medicine, Trinity College Dublin, Ireland. Rhodes, J. Institute of Translational Medicine, University of Liverpool. Kenny, R A. The Irish Longitudinal Study on Ageing, School of Medicine, Trinity College Dublin, Ireland.	Ireland, England		English	Journal Article	2020	Irish Medical Journal	No	N/A	Vitamin D
Vitamin D can prevent COVID-19 infection-induced multiple organ damage.	Aygun H.	(Aygun) Department of Physiology, Faculty of Medicine, Tokat Gaziosmanpasa University, Tokat 60030, Turkey	Turkey	http://dx.doi.org/10.1007/s00210-020-01911-4	English	Article	2020	Naunyn-Schmiedeberg's Archives of Pharmacology	No	2.05	Vitamin D
Vitamin D concentrations and COVID-19 infection in UK Biobank.	Hastie C.E. Mackay D.F. Ho F. Celis-Morales C.A. Katikireddi S.V. Niedzwiedz C.L. Jani B.D. Welsh P. Mair F.S. Gray S.R. O'Donnell C.A. Gill J.M. Sattar N. Pell J.P.	(Hastie, Mackay, Ho, Celis-Morales, Katikireddi, Niedzwiedz, Jani, Mair, O'Donnell, Pell) Institute of Health and Wellbeing, University of Glasgow, 1 Lilybank Gardens, Glasgow G12 8RZ, United Kingdom (Celis-Morales, Welsh, Gray, Gill, Sattar) Institute of Cardiovascular and Medical Sciences, University of Glasgow, BHF Glasgow Cardiovascular Research Centre, 126 University Place, Glasgow G12 8TA, …	Scotland	http://dx.doi.org/10.1016/j.dsx.2020.04.050	English	Article	2020	Diabetes and Metabolic Syndrome: Clinical Research and Reviews	No	N/A	Vitamin D
Vitamin D Deficiency and Air Pollution Exacerbate COVID-19 Through Suppression of Antiviral Peptide LL37	Crane-Godreau M.A., Clem K.J., Payne P., Fiering S.	Department of Immunology and Microbiology, Geisel School of Medicine at Dartmouth, Lebanon, NH, United States; Bodymind Science, LLC, Arlington, VT, United States; Department of Medicine, Geisel School of Medicine at Dartmouth, Lebanon, NH, United States	United States	10.3389/fpubh.2020.00232	English	Article	2020	Frontiers in Public Health	No	2.483	Vitamin D
Vitamin D Deficiency and ARDS after SARS-CoV-2 Infection.	Faul JL Kerley CP Love B O'Neill E Cody C Tormey W Hutchinson K Cormican LJ Burke CM	Faul, J L. Asthma Research Centre, James Connolly Memorial Asthma Research Centre, Connolly Hospital Blanchardstown, Ireland. Kerley, C P. Asthma Research Centre, James Connolly Memorial Asthma Research Centre, Connolly Hospital Blanchardstown, Ireland. Love, B. Department of Pharmacy, Connolly Hospital Blanchardstown, Ireland. O'Neill, E. Department of Microbiology, Connolly Hospital Blanchardst…	Ireland		English	Letter	2020	Irish Medical Journal	No	N/A	Vitamin D
Vitamin D deficiency and co-morbidities in COVID-19 patients – A fatal relationship?	Biesalski H.K.	Institute of Nutritional Sciences, University Hohenheim, Stuttgart, D 70599, Germany	Germany	10.1016/j.nfs.2020.06.001	English	Article	2020	NFS Journal	No	N/A	Vitamin D
Vitamin D deficiency and the COVID-19 pandemic.	Zemb P. Bergman P. Camargo C.A. Cavalier E. Cormier C. Courbebaisse M. Hollis B. Joulia F. Minisola S. Pilz S. Pludowski P. Schmitt F. Zdrenghea M. Souberbielle J.-C.	(Zemb) Gynecology Department, Centre hospitalier de Lorient, Lorient, France (Bergman) Department of Laboratory Medicine, Karolinska Institutet, Stockholm, Sweden (Camargo) Department of Emergency Medicine, Massachusetts General Hospital, Harvard Medical School, Boston, MA, United States (Cavalier) Department of Clinical Chemistry, University of Liege, CHU de Liege, Liege, Belgium (Cormier) Depar…	France, Sweden, United States, Belgium, Italy, Austria, Poland, Romania	http://dx.doi.org/10.1016/j.jgar.2020.05.006	English	Article	2020	Journal of Global Antimicrobial Resistance	No	2.706	Vitamin D
Vitamin D Levels and COVID-19 Susceptibility: Is there any Correlation?.	Razdan K. Singh K. Singh D.	(Razdan) University Institute of Pharmaceutical Sciences, Panjab University, Chandigarh, India (Singh) Department of Pharmaceutical Sciences and Drug Research, Punjabi University Patiala, India (Singh) Department of Pharmaceutical Sciences, Guru Nanak Dev University, Amritsar, India	India	http://dx.doi.org/10.1016/j.medidd.2020.100051	English	Article	2020	Medicine in Drug Discovery	No	N/A	Vitamin D
Vitamin D Receptor stimulation to reduce Acute Respiratory Distress Syndrome (ARDS) in patients with Coronavirus SARS-CoV-2 infections: Revised Ms SBMB 2020_166.	Quesada-Gomez J.M. Castillo M.E. Bouillon R.	(Quesada-Gomez) Instituto Maimonides de Investigacion Biomedica de Cordoba (IMIBIC). Hospital Universitario Reina Sofia, Universidad de Cordoba, Fundacion Progreso y Salud, Avda. Menendez Pidal s/n, 14004, Cordoba, Spain; CIBER de Fragilidad y Envejecimiento Saludable (CIBERFES), Spain (Castillo) UGC de Neumologia. Instituto Maimonides de Investigacion Biomedica de Cordoba (IMIBIC). Hospital Univ…	Spain, Belgium	http://dx.doi.org/10.1016/j.jsbmb.2020.105719	English	Article	2020	Journal of steroid biochemistry and molecular biology	No	3.813	Vitamin D
Vitamin D Supplementation in Influenza and COVID-19 Infections Comment on: "Evidence that Vitamin D Supplementation Could Reduce Risk of Influenza and COVID-19 Infections and Deaths" Nutrients 2020, 12(4), 988.	Kow CS Hadi MA Hasan SS	Kow, Chia Siang. School of Postgraduate Studies, International Medical University, Kuala Lumpur 57000, Malaysia. Hadi, Muhammad Abdul. School of Pharmacy, Institute of Clinical Sciences, University of Birmingham, Birmingham B15 2TT, UK. Hasan, Syed Shahzad. School of Applied Sciences, University of Huddersfield, Huddersfield HD1 3DH, UK.	Malaysia, England	https://dx.doi.org/10.3390/nu12061626	English	Journal Article	2020	Nutrients	No	4.546	Vitamin D
Vitamin D, Covid-19 and Children.	Molloy EJ Murphy N	Molloy, E J. Paediatrics, Trinity College, the University of Dublin. Molloy, E J. Trinity Translational Medicine Institute (TTMI) & Trinity Research in Childhood Centre (TRICC), Trinity College Dublin. Molloy, E J. Paediatrics & Neonatology, Children's Hospital Ireland (CHI) at Tallaght & Crumlin, Dublin. Molloy, E J. Coombe Women and Infants University Hospital, Dublin. Murphy, N. Endocrinology,…	Ireland		English	Journal Article	2020	Irish Medical Journal	No	N/A	Vitamin D
Vitamin D: A simpler alternative to tocilizumab for trial in COVID-19?.	Silberstein M.	(Silberstein) School of Molecular and Life Sciences, Curtin University, Perth, WA, Australia	Australia	http://dx.doi.org/10.1016/j.mehy.2020.109767	English	Letter	2020	Medical Hypotheses	No	1.375	Vitamin D
Vitamin D3 administration to patients with confirmed COVID-19	Rashedi J., Mahdavi Poor B., Asgharzadeh M.	Department of Laboratory Sciences, School of Paramedicine, Tabriz University of Medical Sciences, Tabriz, Iran; Biotechnology Research Center, Tabriz University of Medical Sciences, Tabriz, Iran	Iran		English	Letter	2020	Iranian Journal of Public Health	No	1.291	Vitamin D
Vitamin-D and COVID-19: do deficient risk a poorer outcome?.	Mitchell F.			http://dx.doi.org/10.1016/S2213-8587%2820%2930183-2	English	Article	2020	The Lancet Diabetes and Endocrinology	No	25.34	Vitamin D
Vitamin-d: An immune shield against ncovid-19	Jeyaraman M., Gulati A., Anudeep T.C., Shetty D.U., Latha S., Ajay S.S., Jain R., Santosh M.	Department of Orthopedics, School of Medical Sciences and Research, Sharda University, Greater Noida, Uttar Pradesh, India; Department of Orthopedics, Kalpana Chawla Government Medical College & Hospital, Karnal, Haryana, India; Department of Plastic Surgery, Topiwala National Medical College and BYL Nair Ch. Hospital, Mumbai, Maharashtra, India; Department of Pulmonary Medicine, St. John's Medic…	India	10.31782/IJCRR.2020.12095	English	Article	2020	International Journal of Current Research and Review	No	N/A	Vitamin D
What is the role of supplementation with ascorbic acid, zinc, vitamin D, or N-acetylcysteine for prevention or treatment of COVID-19?.	Bauer S.R. Kapoor A. Rath M. Thomas S.A.	(Bauer) Department of Pharmacy, Cleveland Clinic (Kapoor) Department of Critical Care Medicine, Respiratory Institute, Cleveland Clinic (Rath) Center for Human Nutrition, Digestive Disease & Surgery Institute, Cleveland Clinic (Thomas) Department of Cardiovascular Medicine, Heart, Vascular, Thoracic Institute, Cleveland Clinic	United States	http://dx.doi.org/10.3949/ccjm.87a.ccc046	English	Article	2020	Cleveland Clinic journal of medicine	No	1.552	Ascorbic acid, Zinc, Vitamin D, N-acetylcysteine
Yoga for infirmity in geriatric population amidst COVID-19 pandemic: Comment on "Age and Ageism in COVID-19: Elderly mental health-care vulnerabilities and needs".	Mohanty S. Sharma P. Sharma G.	(Mohanty, Sharma) Center for Integrative Medicine and Research, AIIMS, 7th Floor, Convergence Block, New Delhi, India (Sharma) Center for Integrative Medicine and Research, Department of Cardiology, All India Institute of Medical Sciences, Convergence Block, Ansari Nagar, New Delhi 110029, India	India	http://dx.doi.org/10.1016/j.ajp.2020.102199	English	Letter	2020	Asian Journal of Psychiatry	No	2.529	Yoga
Zinc Iodide in combination with Dimethyl Sulfoxide for treatment of SARS-CoV-2 and other viral infections.	Hoang B.X. Hoang H.Q. Han B.	(Hoang, Han) Nimni-Cordoba Tissue Engineering and Drug Discovery Laboratory, Division of Plastic and Reconstructive Surgery, Department of Surgery, Keck School of Medicine, University of Southern California, 1333 San Pablo Street, BMT-302, Los Angeles, CA 90033, United States (Hoang) Natural Health Medical Center, 4469 Redondo Beach Boulevard, Lawndale, CA 90260, United States	United States	http://dx.doi.org/10.1016/j.mehy.2020.109866	English	Article	2020	Medical Hypotheses	No	1.375	Zinc Iodide, Dimethyl Sulfoxide
